# Supplementary material for: Sustainable synthesis of thiosulfonates and disulfides by molybdenum-catalyzed selective oxidation of thiols
Source: Royal Society of Chemistry journal article supplement (doi:10.1039/d4gc00074a), 2024-01-01

*Supporting information for*

**Sustainable synthesis of thiosulfonates and disulfides by  
molybdenum-catalyzed selective oxidation of thiols**

Zhibin Zhou,<sup>a</sup> Hao Xu,<sup>a</sup> Jiamin Ma,<sup>a</sup> Xianghua Zeng,<sup>a,b\*</sup> and Yongge Wei<sup>b\*</sup>

<sup>a</sup>*College of Biological, Chemical Science and Engineering, Jiaying University,  
Jiaying 314001, P.R. China; E-mail: [xianghuazeng@zjxu.edu.cn](mailto:xianghuazeng@zjxu.edu.cn)*

<sup>b</sup>*Key Lab of Organic Optoelectronics & Molecular Engineering of Ministry of  
Education, Department of Chemistry, Tsinghua University, Beijing 100084, P.R.  
China; E-mail: [yonggewei@mail.tsinghua.edu.cn](mailto:yonggewei@mail.tsinghua.edu.cn)*

**Experimental procedures and analytical data**

| Contents:                                                   | page |
|-------------------------------------------------------------|------|
| 1. General information                                      | S2   |
| 2. General procedure for preparation of molybdenum catalyst | S2   |
| 3. Optimization of reaction conditions                      | S3   |
| 4. General procedure for synthesis of thiosulfonates        | S4   |
| 5. General procedure for synthesis of disulfides            | S4   |
| 6. General procedure for synthesis of compound <b>4</b>     | S5   |
| 7. General procedure for synthesis of compound <b>5</b>     | S5   |
| 8. General procedure for synthesis of compound <b>6</b>     | S6   |
| 9. General procedure for synthesis of compound <b>7</b>     | S7   |
| 10. Recycling and reuse of catalyst                         | S7   |
| 11. Mechanistic investigations                              | S8   |
| 12. Preparation and characterization of Mo(V)-OH species    | S11  |
| 13. Analytical data                                         | S13  |
| 14. References                                              | S33  |
| 15. Copies of NMR spectra for compounds                     | S35  |

## 1. General information

The thiols, H<sub>2</sub>O<sub>2</sub>, (NH<sub>4</sub>)<sub>6</sub>Mo<sub>7</sub>O<sub>24</sub>·4H<sub>2</sub>O, (*n*-Bu)<sub>4</sub>NBr, all commercial reagents and metal catalyst were obtained from Energy Chemical, Sinopharm Chemical Reagent Co., Ltd and TCI, and used without further purification. <sup>1</sup>H, <sup>13</sup>C and <sup>19</sup>F NMR spectra were recorded on Varian 400 MHz NMR spectrometer using CDCl<sub>3</sub> as solvent and TMS as an internal standard. Chemical shifts are reported in parts per million (ppm, δ). Reactions were monitored using thin-layer chromatography (TLC) on commercial silica gel plates (GF 254), and were performed under UV light (254 nm). Liquid chromatography was performed using forced flow (flash chromatography) on silica gel (SiO<sub>2</sub>, 200 × 300 Mesh) purchased from Huanghai Chemical Co., Ltd. All the new products were further characterized by high resolution mass spectra (ESI-QTOF). IR spectra were recorded on a Nicolet iS10 FT-IR spectrophotometer (KBr pellets) over the region of 400-4000 cm<sup>-1</sup>. The Raman spectra were obtained on ThermoFisher DXR2xi with an excitation wavelength of 633 nm. The UV/vis was tested on SHIMADZU UV2550 over the region of 800-200 nm. The cyclic voltammetry (CV) were tested on Metnohm AUT128N.V. Gas Chromatography (GC) was tested on Agilent 7890B.

## 2. General procedure for preparation of molybdenum catalyst <sup>[1]</sup>

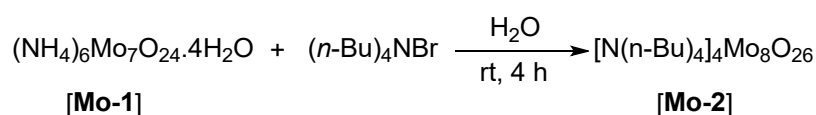

To a round-bottomed flask (500 mL) was added (NH<sub>4</sub>)<sub>6</sub>Mo<sub>7</sub>O<sub>24</sub>·4H<sub>2</sub>O (18.5g, 15mmol) and H<sub>2</sub>O (200 mL), and then a solution of (*n*-Bu)<sub>4</sub>NBr (17g, 53 mmol) in 100 mL H<sub>2</sub>O was added dropwise within 1 hour. The reaction mixture was stirred at 25 °C for 3 h and the formed precipitate was filter and dried under vacuum to afford the crude product. The crude compound was recrystallized from acetonitrile to obtain analytically pure [Mo-2] product (20 g, 72%, white solid). [N(*n*-Bu)<sub>4</sub>]<sub>4</sub>Mo<sub>8</sub>O<sub>26</sub> (2168): calcd. C 35.95, H 6.74, N 2.62; found C 35.76, H 6.81, N 2.49. IR (KBr disks): 2979 (v CH, s), 2948 (v CH, s), 1633 (CN, m), 1491 (δ CH, m), 1380 (δ CH, m), 1353 (w), 1157 (w), 1069 (w), 1037 (w), 951 (v MoO, s), 925 (v MoO, s), 906 (v MoO, s), 812

(w), 800 (w), 733 (w), 664 (v MoOMo, vs), 560 (m), 522 (w)  $\text{cm}^{-1}$ . Spectral data were in accordance with the literature.<sup>[1]</sup>

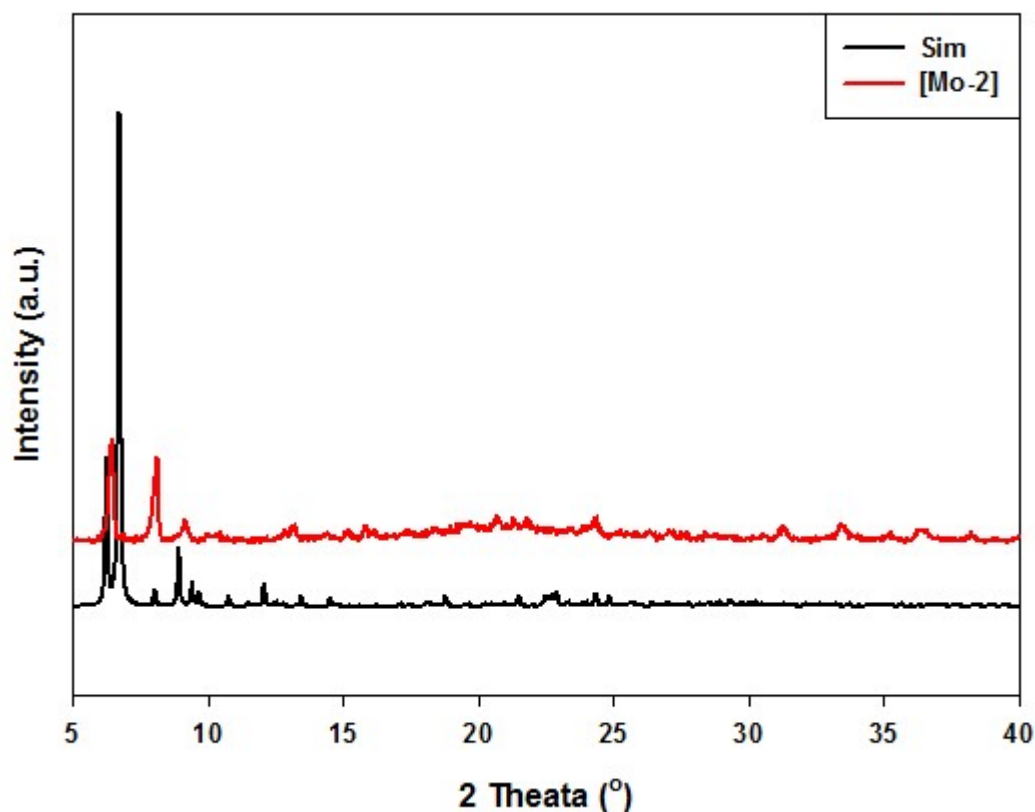

**Figure S1.** The experimental (red) and simulated (black) PXRD patterns for [Mo-2]. The main diffraction peaks of experimental patterns basically match with the simulated ones, confirming the crystal phase purity of compound [Mo-2].

### 3. Optimization of reaction conditions

**Table S1.** Optimization of reaction conditions for **2a**<sup>a</sup>

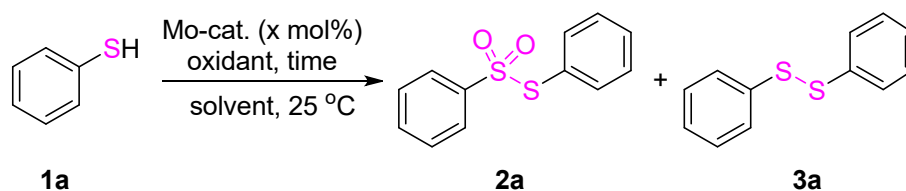

| entry | Mo-cat.<br>(x mol%) | oxidant<br>(y equiv.)             | solvent | time (h) | <b>2a</b> (%) <sup>b</sup> | <b>3a</b> (%) <sup>b</sup> |
|-------|---------------------|-----------------------------------|---------|----------|----------------------------|----------------------------|
| 1     | [Mo-1](0.5%)        | H <sub>2</sub> O <sub>2</sub> (4) | EtOH    | 6        | 8                          | 20                         |
| 2     | [Mo-2](0.5%)        | H <sub>2</sub> O <sub>2</sub> (4) | EtOH    | 6        | 95                         | 3                          |

|    |                                         |                                   |                                   |    |    |    |
|----|-----------------------------------------|-----------------------------------|-----------------------------------|----|----|----|
| 3  | Na <sub>2</sub> MoO <sub>4</sub> (0.5%) | H <sub>2</sub> O <sub>2</sub> (4) | EtOH                              | 6  | 17 | 32 |
| 4  | MoO <sub>3</sub> (0.5%)                 | H <sub>2</sub> O <sub>2</sub> (4) | EtOH                              | 6  | 78 | 14 |
| 5  | [Mo-2] (0.5%)                           | H <sub>2</sub> O <sub>2</sub> (3) | EtOH                              | 6  | 90 | 6  |
| 6  | [Mo-2] (0.5%)                           | H <sub>2</sub> O <sub>2</sub> (4) | MeCN                              | 6  | 96 | 2  |
| 7  | [Mo-2] (0.5%)                           | H <sub>2</sub> O <sub>2</sub> (4) | THF                               | 6  | 80 | 9  |
| 8  | [Mo-2] (0.5%)                           | H <sub>2</sub> O <sub>2</sub> (4) | MeOH                              | 6  | 87 | 12 |
| 9  | [Mo-2] (0.5%)                           | H <sub>2</sub> O <sub>2</sub> (4) | H <sub>2</sub> O                  | 6  | 45 | 23 |
| 10 | [Mo-2] (0.5%)                           | H <sub>2</sub> O <sub>2</sub> (4) | CH <sub>3</sub> COCH <sub>3</sub> | 6  | 71 | 15 |
| 11 | [Mo-2] (0.5%)                           | H <sub>2</sub> O <sub>2</sub> (4) | EtOH                              | 5  | 86 | 12 |
| 12 | [Mo-2] (0.5%)                           | H <sub>2</sub> O <sub>2</sub> (3) | EtOH                              | 8  | 95 | 2  |
| 13 | MoO <sub>3</sub> (0.5%)                 | H <sub>2</sub> O <sub>2</sub> (4) | EtOH                              | 24 | 91 | 5  |

<sup>a</sup>Reaction conditions: **1a** ( 0.4 mmol), catalyst (x mol%), oxidant ( y equiv.), Solvent (2 mL), 25 °C. <sup>b</sup>Isolated yield.

**Table S2.** Optimization of reaction conditions for **3a**<sup>a</sup>

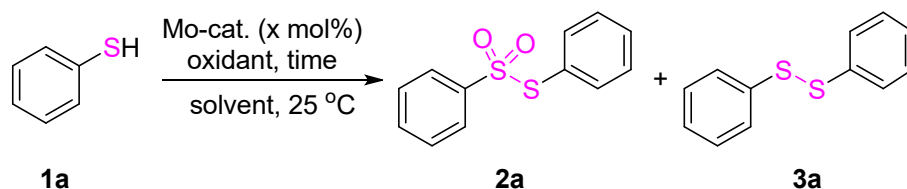

| entry | Mo-cat.<br>(x mol%)                     | oxidant        | solvent          | time (h) | <b>2a</b> (%) <sup>b</sup> | <b>3a</b> (%) <sup>b</sup> |
|-------|-----------------------------------------|----------------|------------------|----------|----------------------------|----------------------------|
| 1     | [Mo-1](0.5%)                            | Air            | EtOH             | 24       | -                          | 38                         |
| 2     | [Mo-2](0.5%)                            | Air            | EtOH             | 24       | -                          | 65                         |
| 3     | Na <sub>2</sub> MoO <sub>4</sub> (0.5%) | Air            | EtOH             | 24       | -                          | 47                         |
| 4     | MoO <sub>3</sub> (0.5%)                 | Air            | EtOH             | 24       | -                          | 54                         |
| 5     | [Mo-2] (1%)                             | Air            | EtOH             | 24       | 2                          | 88                         |
| 6     | [Mo-2] (1%)                             | O <sub>2</sub> | EtOH             | 12       | 7                          | 85                         |
| 7     | [Mo-2] (1%)                             | Air            | THF              | 24       | -                          | 52                         |
| 8     | [Mo-2] (1%)                             | Air            | MeOH             | 24       | -                          | 80                         |
| 9     | [Mo-2] (1%)                             | Air            | H <sub>2</sub> O | 24       | -                          | 36                         |

|    |             |     |                                   |    |   |    |
|----|-------------|-----|-----------------------------------|----|---|----|
| 10 | [Mo-2] (1%) | Air | CH <sub>3</sub> COCH <sub>3</sub> | 24 | - | 72 |
| 11 | [Mo-2] (1%) | Air | EtOH                              | 18 | - | 81 |
| 12 | [Mo-2] (1%) | Air | EtOH                              | 36 | 4 | 86 |

<sup>a</sup>Reaction conditions: **1a** (0.4 mmol), catalyst (x mol%), oxidant, solvent (2 mL), 25 °C. <sup>b</sup>Isolated yield.

#### 4. General procedure for synthesis of thiosulfonates

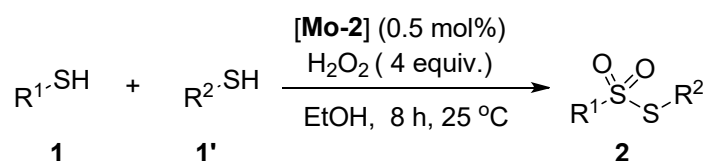

**0.2 mmol scale:** In a 10 mL tube was added **1** (0.2 mmol), **1'** (0.2 mmol), [**Mo-2**] (2.2 mg), H<sub>2</sub>O<sub>2</sub> (91 mg), EtOH (2 mL). The reaction mixture was stirred at 25 °C for 8 h. Then the resulting mixture was evaporated under reduced pressure and purified by flash chromatography to afford the desired product.

**5 mmol scale:** In a 10 mL tube was added **1a** (0.2 mmol), [**Mo-2**] (28 mg), H<sub>2</sub>O<sub>2</sub> (1.14g), EtOH (5 mL). The reaction mixture was stirred at 25 °C for 8 h. Then the resulting mixture was evaporated under reduced pressure and purified by flash chromatography to afford the desired product.

#### 5. General procedure for synthesis of disulfides

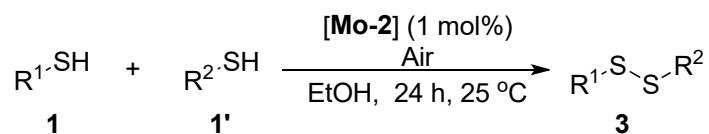

**0.2 mmol scale:** In a 10 mL tube was added **1** (0.2 mmol), **1'** (0.2 mmol), [**Mo-2**] (4.4 mg) and EtOH (2 mL). The reaction mixture was stirred at 25 °C for 24 h under air atmosphere. Then the resulting mixture was evaporated under reduced pressure and purified by flash chromatography to afford the desired product.

**5 mmol scale:** In a 10 mL tube was added **1a** (5 mmol), [**Mo-2**] (56 mg) and EtOH (5 mL). The reaction mixture was stirred at 25 °C for 24 h under air atmosphere. Then the resulting mixture was evaporated under reduced pressure and purified by

flash chromatography to afford the desired product.

## 6. General procedure for synthesis of compound 4<sup>[2]</sup>

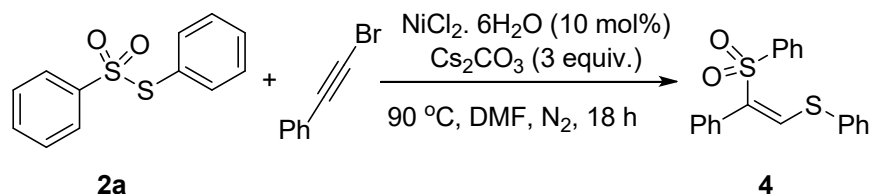

A 10 mL tube was charged with (bromoethynyl)benzene **1a** (0.2 mmol), thiosulfonate **2a** (0.3 mmol),  $\text{NiCl}_2 \cdot 6\text{H}_2\text{O}$  (0.02 mmol) and  $\text{Cs}_2\text{CO}_3$  (0.6 mmol) in DMF (1.0 mL). The reaction mixture was stirred at 90 °C for 18 h under  $\text{N}_2$  atmosphere. Then the mixture was quenched by the addition of  $\text{H}_2\text{O}$  (1 mL) followed by extraction with EtOAc (3×3 mL). The combined organic layers were washed with brine (2×3 mL), dried over anhydrous  $\text{MgSO}_4$ , and the solvent was removed under reduced pressure. The resulting residue was purified by flash chromatography to give the corresponding product.

## 7. General procedure for synthesis of compound 5<sup>[3]</sup>

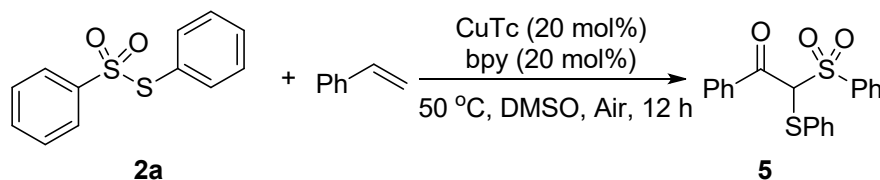

To a mixture of copper thiophene-2-carboxylate (20 mol %), 2,2'-bipyridine (20 mol %) in solvent (1 mL DMSO + 36 mg water), styrene (0.2 mmol), and thiosulfonate **2a** (0.6 mmol) were added. The reaction system was stirred at 50 °C under air atmosphere for 12 h. Then, the resulting mixture was evaporated under reduced pressure and purified by flash chromatography to afford the desired product.

## 8. General procedure for synthesis of compound 6<sup>[4]</sup>

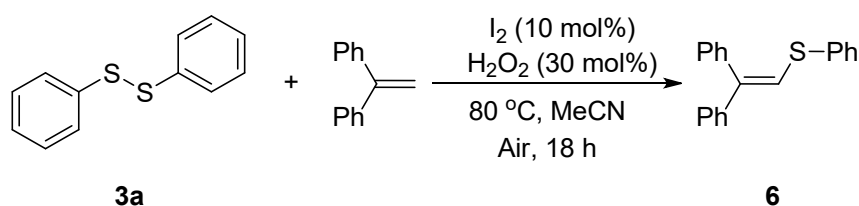

A 10 mL tube was charged with ethene-1,1-diyldibenzene (0.2 mmol), disulfide

**3a** (0.2 mmol), I<sub>2</sub> (0.02 mmol) and H<sub>2</sub>O<sub>2</sub> (0.06 mmol) in MeCN (2 mL). The reaction mixture was stirred at 80 °C for 18 h under air atmosphere. Then the mixture was quenched by the addition of H<sub>2</sub>O (1 mL) followed by extraction with EtOAc (3×3 mL). The combined organic layers were washed with brine (2×3 mL), dried over anhydrous MgSO<sub>4</sub>, and the solvent was removed under reduced pressure. The resulting residue was purified by flash chromatography to give the corresponding product.

### 9. General procedure for synthesis of compound **7**<sup>[5]</sup>

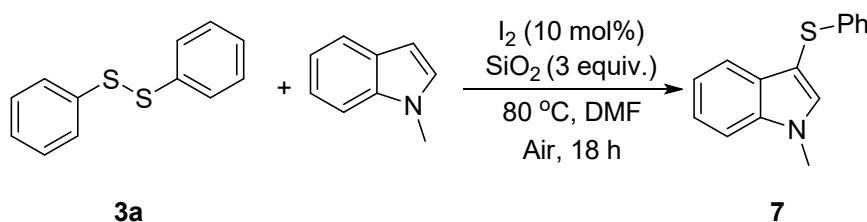

A 10 mL tube was charged with 1-methyl-1*H*-indole (0.22 mmol), disulfide **3a** (0.2 mmol), I<sub>2</sub> (0.02 mmol) and SiO<sub>2</sub> (0.6 mmol) in DMF (2 mL). The reaction mixture was stirred at 80 °C for 18 h under air atmosphere. Then the mixture was quenched by the addition of H<sub>2</sub>O (1 mL) followed by extraction with EtOAc (3×3 mL). The combined organic layers were washed with brine (2×3 mL), dried over anhydrous MgSO<sub>4</sub>, and the solvent was removed under reduced pressure. The resulting residue was purified by flash chromatography to give the corresponding product.

### 10. Recycling and reuse of catalyst

A 10 mL tube was charged with **1a** (5 mmol), [**Mo-2**] (28 mg), H<sub>2</sub>O<sub>2</sub> (1.14 g), EtOH (5 mL). The reaction mixture was stirred at 25 °C for 8 h. In each run, the resulting mixture was evaporated under reduced pressure, and then washed thoroughly with ethyl acetate, and dried under vacuum. Subsequently, the dried catalyst was used further, without any purification or reactivation. The washing liquid was evaporated under vacuum, and the residue was purified by column chromatography.

**Table S3.** Recycling of [Mo-2] catalyst

|                                                                                    |           |     |     |           |     |
|------------------------------------------------------------------------------------|-----------|-----|-----|-----------|-----|
| 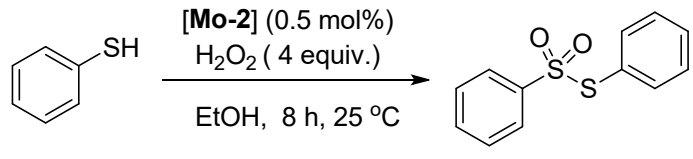 |           |     |     |           |     |
|                                                                                    | <b>1a</b> |     |     | <b>2a</b> |     |
| Run                                                                                | 1st       | 2nd | 3rd | 4th       | 5th |
| Yield (%)                                                                          | 86        | 85  | 82  | 83        | 80  |

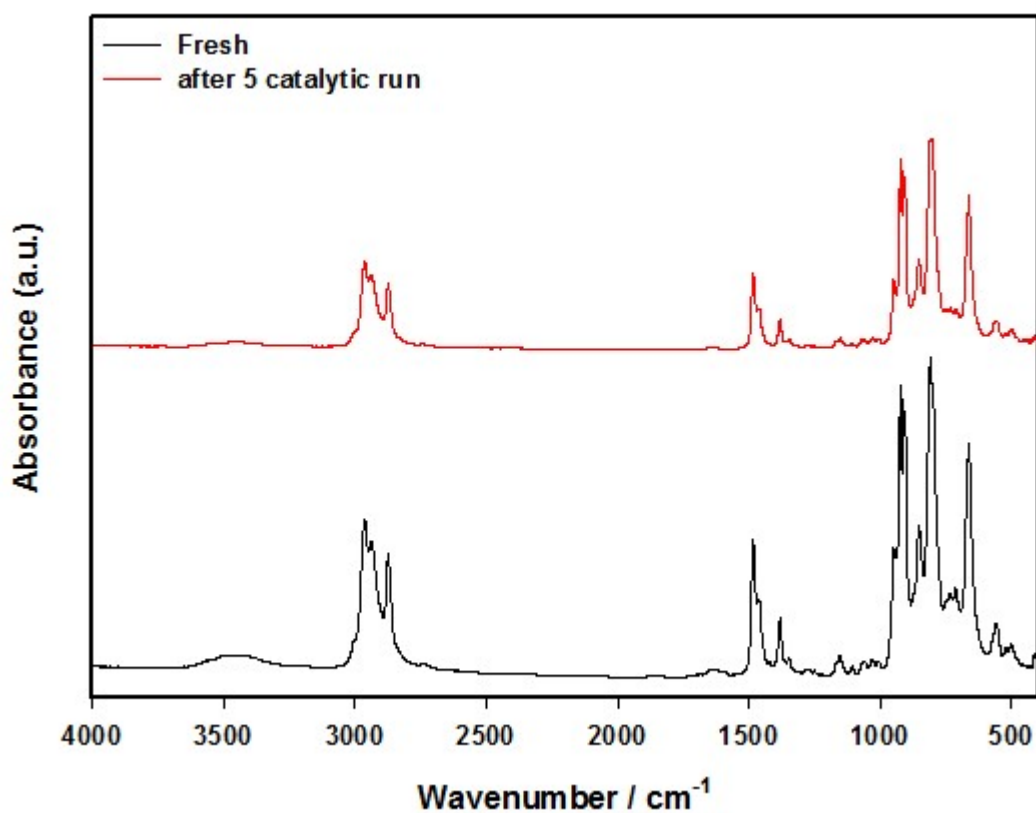

**Figure S2.** IR spectrums of the [Mo-2] catalyst

## 11. Mechanistic investigations

### 11.1 Radical intermediate trap reaction

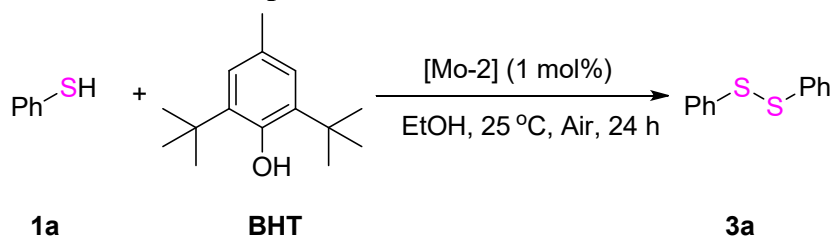

**1a** (0.4 mmol), [Mo-2] (1 mol%), BHT (0.2 or 2 equiv.), and EtOH (2.0 mL) were



added to a tube (10 mL) under air atmosphere. The resulting mixture was stirred at 25 °C for 24 h. After completion, the solvent was removed under reduced pressure and the resulting crude compound was tested by <sup>1</sup>H NMR.

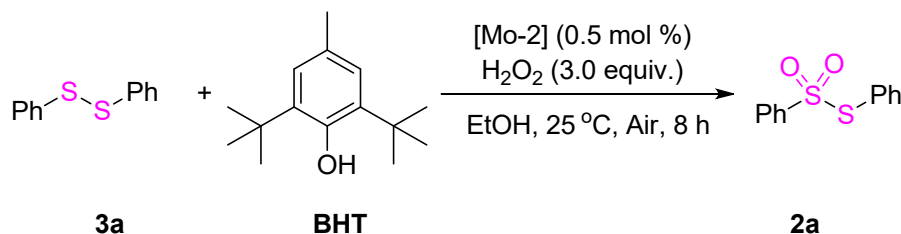

**1a** (0.2 mmol), [Mo-2] (0.5 mol%), H<sub>2</sub>O<sub>2</sub> (3.0 equiv.), BHT (0.2 or 2 equiv. ), and EtOH (2.0 mL) were added to a tube (10 mL) under air atmosphere. The resulting mixture was stirred at 25 °C for 8 h. After completion, the solvent was removed under reduced pressure and the resulting crude compound was tested by <sup>1</sup>H NMR.

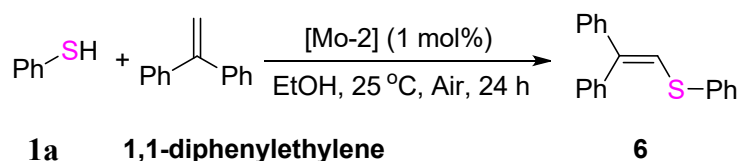

**1a** (0.2 mmol), [Mo-2] (1 mol%), 1,1-Diphenylethylene (0.3 mmol), and EtOH (2.0 mL) were added to a tube (10 mL) under air atmosphere. The resulting mixture was stirred at 25 °C for 24 h. After completion, the solvent was removed under reduced pressure and the residue was purified by silica gel column chromatography with petroleum ether (30~60 °C b.p.) and ethyl acetate as the eluent (PE/EA=10:1, V/V) to afford the compound **6** in 17% yield (Colorless oil, 9.8 mg).

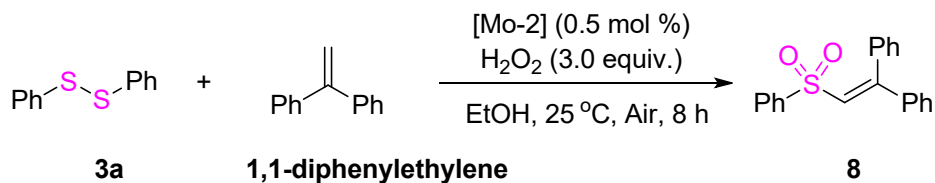

**3a** (0.2 mmol), [Mo-2] (0.5 mol%), H<sub>2</sub>O<sub>2</sub> (3.0 equiv.), 1,1-Diphenylethylene (0.3 mmol), and EtOH (2.0 mL) were added to a tube (10 mL) under air atmosphere. The resulting mixture was stirred at 25 °C for 24 h. After completion, the solvent was removed under reduced pressure and the residue was purified by silica gel column

chromatography with petroleum ether (30~60 °C b.p.) and ethyl acetate as the eluent (PE/EA=5:1, V/V) to afford the compound **8** in 23% yield (Colorless oil, 14.7 mg).

### 11.2 Kinetic profile of **1a** with H<sub>2</sub>O<sub>2</sub> as an oxidant for oxidation

In a 10 mL tube was added **1** (0.4 mmol), [**Mo-2**] (2.2 mg), H<sub>2</sub>O<sub>2</sub> (91 mg), EtOH (2 mL). The reaction mixture was stirred at 25 °C. Then the resulting mixture was monitored by GC spectrum.

### 11.3 Kinetic profile of **1a** with Air as an oxidant for oxidation

In a 10 mL tube was added **1** (0.4 mmol), [**Mo-2**] (4.4 mg), H<sub>2</sub>O<sub>2</sub> (91 mg), EtOH (2 mL). The reaction mixture was stirred at 25 °C. Then the resulting mixture was monitored by GC spectrum.

### 11.4 General procedure for UV-vis studies

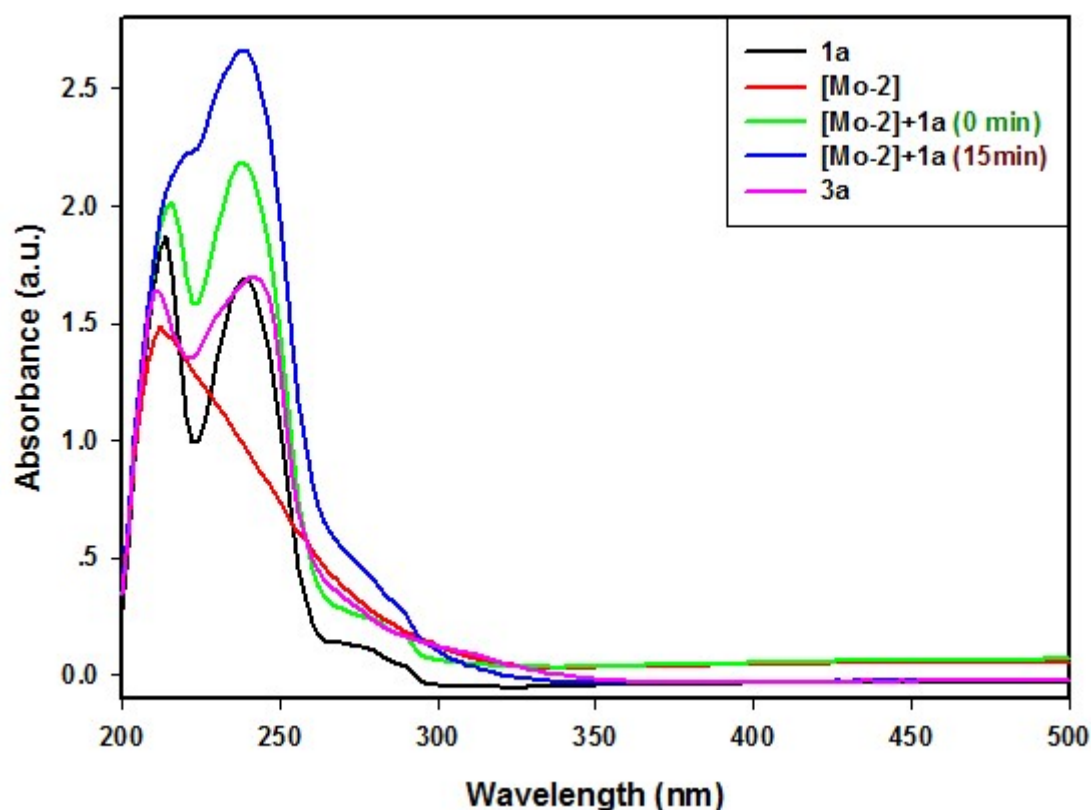

**Figure S3.** UV-visible spectra of compounds in CH<sub>3</sub>CH<sub>2</sub>OH solution: **1a**=0.00013 mmol/mL (black line); [**Mo-2**]=0.00012 mmol/mL (red line); **3a**=0.00013 mmol/mL (pink line); the volume ratio of [**Mo-2**]/**1a**=1:1 (green line and blue line). All the test conditions are in air atmosphere.

### 11.5 General procedure for cyclic voltammetry studies

The compound (0.2 mmol) was added in MeCN solution (with 0.1 M *n*-Bu<sub>4</sub>NBF<sub>4</sub> as electrolyte) at room temperature. The voltammogram was obtained with a Pt wire as counter electrode and Ag/AgCl as a reference electrode. The scan rate was 0.1 V/s on a glassy carbon electrode (d = 1 mm).

### 11.6 General procedure for Raman spectra studies

The Raman spectra were obtained on ThermoFisher DXR2xi with an excitation wavelength of 633 nm. Firstly, 10 mg of [Mo-2] powder were placed on a glass slide and then tested in an instrument to obtain data. Secondly, these samples were treated with 30% H<sub>2</sub>O<sub>2</sub> (1.2 mg) for 10 min. Thirdly, the resulting solid was washing with ethanol and drying under flow N<sub>2</sub> atmosphere for 10 min, then it was used to test again.

## 12. Preparation and characterization of Mo(V)-OH species

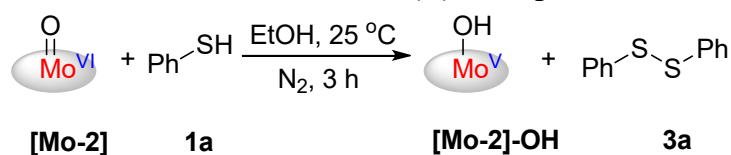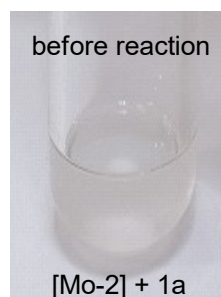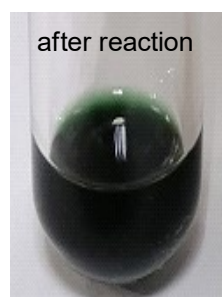

**1a** (0.08 mmol), [Mo-2] (0.01 mmol), and EtOH (2.0 mL) were added to a tube (10 mL) under N<sub>2</sub> atmosphere. The resulting mixture was stirred at 25 °C for 3 h. After completion, the resulting mixture was evaporated under reduced pressure, and then the solid was washed thoroughly with *n*-hexane, and dried under vacuum. Subsequently, the dried solid was tested by IR. The washing liquid was evaporated under vacuum, and the residue was purified by column chromatography to give **3a** in 86% yield.

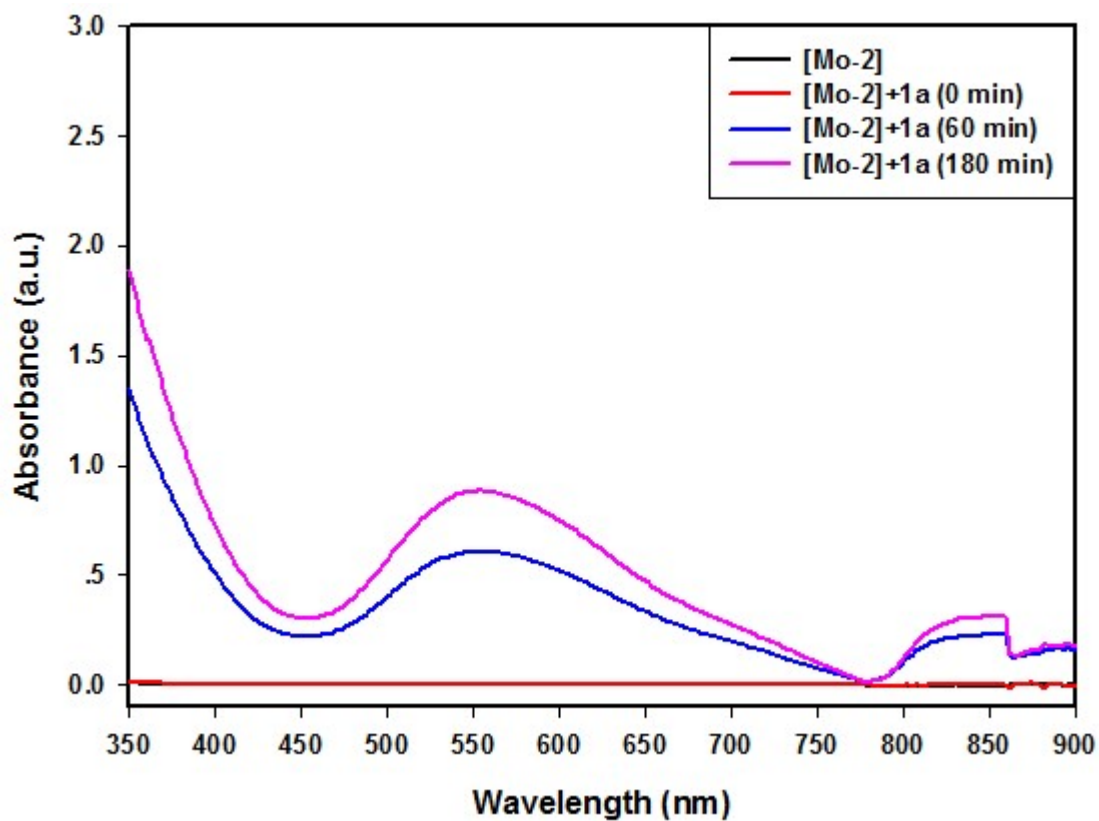

**Figure S4.** UV-visible spectra of the complexes in CH<sub>3</sub>CH<sub>2</sub>OH solution, and the concentration is about 0.001 mmol/mL (based on [Mo-2]). All the test conditions are in N<sub>2</sub> atmosphere.

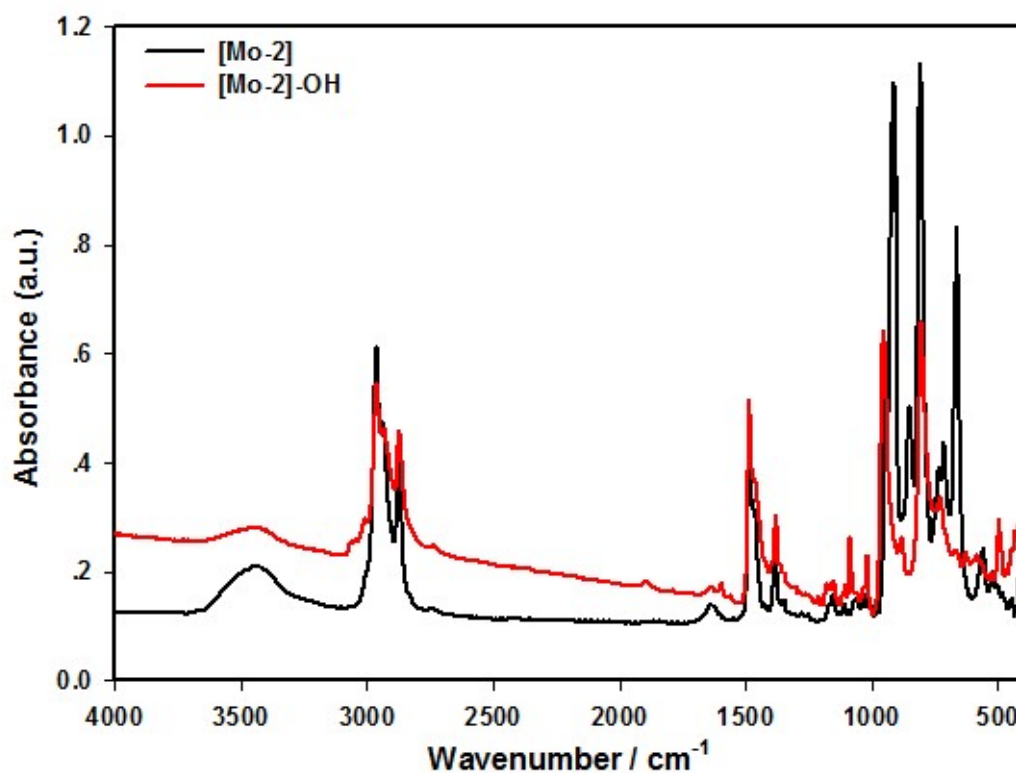

**Figure S5.** IR spectra of the [Mo-2] and resulting solid [Mo-2]-OH (KBr pellet)

### 13. Analytical data

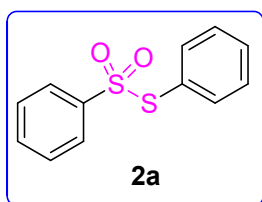

*S*-phenyl benzenesulfonylthioate (**2a**). White solid, yield 47.5 mg (95%); TLC (petroleum ether: AcOEt=5:1),  $R_f = 0.52$ .  $^1\text{H}$  NMR (400 MHz,  $\text{CDCl}_3$ ):  $\delta$  (ppm) = 7.55-7.59 (m, 3H), 7.47 (t,  $J=6.4$  Hz, 1H), 7.39-7.43 (m, 2H), 7.31-7.36 (m, 4H);  $^{13}\text{C}$  NMR (101 MHz,  $\text{CDCl}_3$ ):  $\delta$  (ppm) = 142.9, 136.6, 133.7, 131.4, 129.4, 128.8, 127.8, 127.5. Spectral data were in accordance with the literature.<sup>[6]</sup>

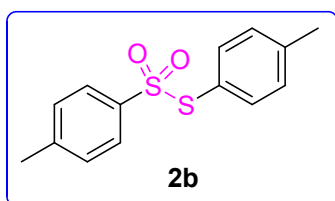

*S*-*p*-tolyl 4-methylbenzenesulfonylthioate (**2b**). White solid, yield 52.3 mg (94%); TLC (petroleum ether: AcOEt=5:1),  $R_f = 0.56$ .  $^1\text{H}$  NMR (400 MHz,  $\text{CDCl}_3$ ):  $\delta$  (ppm) = 7.46 (d,  $J=8.4$  Hz, 2H), 7.21-7.27 (m, 4H), 7.14 (d,  $J=7.6$  Hz, 2H), 2.43 (s, 3H), 2.38 (s, 3H);  $^{13}\text{C}$  NMR (101 MHz,  $\text{CDCl}_3$ ):  $\delta$  (ppm) = 144.6, 142.0, 140.5, 136.5, 130.2, 129.3, 127.6, 124.6, 21.7, 21.5. Spectral data were in accordance with the literature.<sup>[6]</sup>

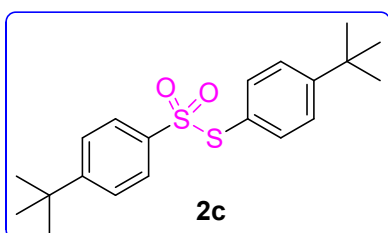

*S*-(4-(*tert*-butyl)phenyl) 4-(*tert*-butyl)benzenesulfonylthioate (**2c**). White solid, yield 66.6 mg (92%); TLC (petroleum ether: AcOEt=10:1),  $R_f = 0.62$ .  $^1\text{H}$  NMR (400 MHz,  $\text{CDCl}_3$ ):  $\delta$  (ppm) = 7.34 (d,  $J=8.0$  Hz, 2H), 7.26 (d,  $J=7.6$  Hz, 2H), 7.19 (d,  $J=8.0$  Hz, 2H), 7.13 (d,  $J=6.8$  Hz, 2H), 1.88 (s, 9H), 1.79 (s, 9H);  $^{13}\text{C}$  NMR (101 MHz,  $\text{CDCl}_3$ ):  $\delta$  (ppm) = 157.4, 154.9, 140.0, 136.2, 127.3, 126.3, 125.5, 124.5, 35.1, 34.8, 31.0, 30.9. Spectral data were in accordance with the literature.<sup>[6]</sup>

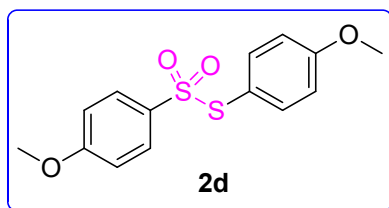

*S*-(4-methoxyphenyl) 4-methoxybenzenesulfonylthioate

(**2d**). White solid, yield 58.9 mg (95%); TLC (petroleum ether: AcOEt=5:1),  $R_f = 0.32$ .  $^1\text{H}$  NMR (400 MHz,  $\text{CDCl}_3$ ):  $\delta$  (ppm) = 7.48 (d,  $J=8.8$  Hz, 2H), 7.24 (d,  $J=7.2$  Hz, 2H), 6.82-6.87 (m, 4H), 3.85 (s, 3H), 3.81 (s, 3H);  $^{13}\text{C}$  NMR (101 MHz,  $\text{CDCl}_3$ ):  $\delta$  (ppm) = 163.5, 162.2, 138.2, 134.8, 129.9, 118.9, 114.9, 113.8, 55.7, 55.5. Spectral data were in accordance with the literature.<sup>[6]</sup>

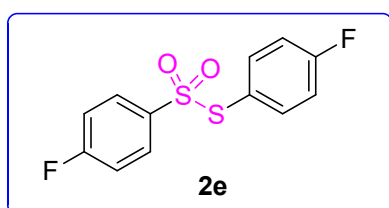

*S*-(4-fluorophenyl) 4-fluorobenzenesulfonylthioate (**2e**).

White solid, yield 50.4 mg (88%); TLC (petroleum ether: AcOEt=10:1),  $R_f = 0.60$ .  $^1\text{H}$  NMR (400 MHz,  $\text{CDCl}_3$ ):  $\delta$  (ppm) = 7.57 (dd,  $J=4.8$  Hz, 2H), 7.33-7.36 (m, 2H), 7.11 (t,  $J=8.0$  Hz, 2H), 7.05 (t,  $J=8.0$  Hz, 2H);  $^{13}\text{C}$  NMR (101 MHz,  $\text{CDCl}_3$ ):  $\delta$  (ppm) = 165.0 (d,  $J=256$  Hz), 164.7 (d,  $J=253$  Hz), 138.8, 138.7, 130.3 (d,  $J=10$  Hz), 123.1 (d,  $J=4$  Hz), 116.8 (d,  $J=23$  Hz), 116.1 (d,  $J=23$  Hz);  $^{19}\text{F}$  NMR (376 MHz,  $\text{CDCl}_3$ ):  $\delta$  (ppm) = -102.6, -106.9. Spectral data were in accordance with the literature.<sup>[6]</sup>

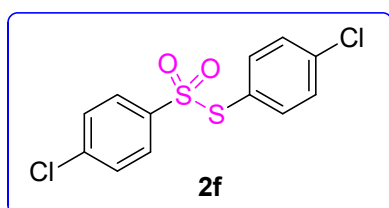

*S*-(4-chlorophenyl) 4-chlorobenzenesulfonylthioate

(**2f**). White solid, yield 58.5 mg (92%); TLC (petroleum ether: AcOEt=10:1),  $R_f = 0.56$ .  $^1\text{H}$  NMR (400 MHz,  $\text{CDCl}_3$ ):  $\delta$  (ppm) = 7.52 (d,  $J=8.4$  Hz, 2H), 7.43 (d,  $J=8.0$  Hz, 2H), 7.30-7.36 (m, 4H);  $^{13}\text{C}$  NMR (101 MHz,  $\text{CDCl}_3$ ):  $\delta$  (ppm) = 141.3, 140.6, 138.6, 137.7, 129.9, 129.3, 128.9, 126.0. Spectral data were in accordance with the literature.<sup>[6]</sup>

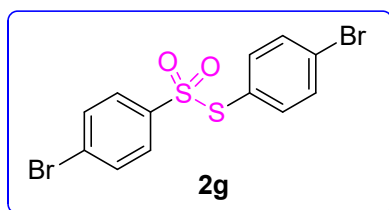

*S*-(4-bromophenyl) 4-bromobenzenesulfonylthioate

**(2g)**. White solid, yield 60.9 mg (75%); TLC (petroleum ether: AcOEt=20:1),  $R_f$  = 0.50.  $^1\text{H}$  NMR (400 MHz,  $\text{CDCl}_3$ ):  $\delta$  (ppm) = 7.57-7.62 (m, 2H), 7.41-7.50 (m, 4H), 7.31 (d,  $J=7.6$  Hz, 1H), 7.22 (d,  $J=7.6$  Hz, 1H);  $^{13}\text{C}$  NMR (101 MHz,  $\text{CDCl}_3$ ):  $\delta$  (ppm) = 137.8, 136.9, 132.9, 132.5, 132.3, 132.2, 128.9, 125.9. Spectral data were in accordance with the literature.<sup>[6]</sup>

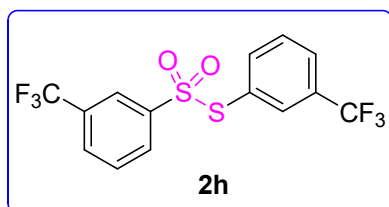

*S*-(3-(trifluoromethyl)phenyl) 3-(trifluoromethyl)benzenesulfonylthioate (**2h**)

**(2h)**. Yellow oil, yield 61.8 mg (80%); TLC (petroleum ether: AcOEt=10:1),  $R_f$  = 0.52.  $^1\text{H}$  NMR (400 MHz,  $\text{CDCl}_3$ ):  $\delta$  (ppm) = 7.87 (d,  $J=7.6$  Hz, 1H), 7.77-7.83 (m, 2H), 7.63-7.71 (m, 3H), 7.44-7.59 (m, 1H), 7.26 (s, 1H);  $^{13}\text{C}$  NMR (101 MHz,  $\text{CDCl}_3$ ):  $\delta$  (ppm) = 143.3, 139.9, 133.0, 132.98, 130.57, 130.54, 130.49, 130.48, 130.34, 130.04, 128.67, 128.45 (q,  $J=3$  Hz), 124.7;  $^{19}\text{F}$  NMR (376 MHz,  $\text{CDCl}_3$ ):  $\delta$  (ppm) = -63.10, -63.12. Spectral data were in accordance with the literature.<sup>[7]</sup>

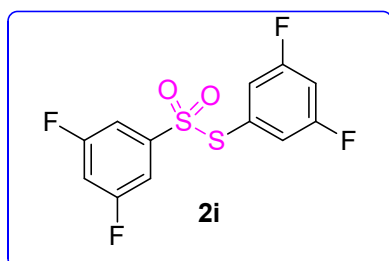

*S*-(3,5-difluorophenyl) 3,5-difluorobenzenesulfonylthioate (**2i**)

**(2i)**. Yellow solid, yield 41.9 mg (65%); TLC (petroleum ether: AcOEt=10:1),  $R_f$  = 0.50.  $^1\text{H}$  NMR (400 MHz,  $\text{CDCl}_3$ ):  $\delta$  (ppm) = 7.19 (s, 2H), 7.10 (t,  $J=6.8$  Hz, 1H), 7.01 (s, 3H);  $^{13}\text{C}$  NMR (101 MHz,  $\text{CDCl}_3$ ):  $\delta$

(ppm) = 163.8 (d,  $J=13$  Hz), 161.3 (d,  $J=13$  Hz), 119.4, 119.3, 119.2, 119.1, 111.3, 111.0, 109.9, 107.9;  $^{19}\text{F}$  NMR (376 MHz,  $\text{CDCl}_3$ ):  $\delta$  (ppm) = -104.5, -106.5. Spectral data were in accordance with the literature.<sup>[8]</sup>

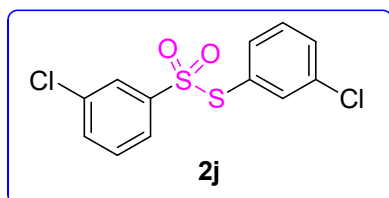

*S*-(3-chlorophenyl) 3-chlorobenzenesulfonylthioate

**(2j)**. Colorless oil, yield 57.2 mg (90%); TLC (petroleum ether: AcOEt=20:1),  $R_f$  = 0.45.  $^1\text{H}$  NMR (400 MHz,  $\text{CDCl}_3$ ):  $\delta$  (ppm) = 7.56 (d,  $J=6.4$  Hz, 1H), 7.52 (s, 1H), 7.38-7.48 (m, 3H), 7.28-7.38 (m, 3H);  $^{13}\text{C}$  NMR (101 MHz,  $\text{CDCl}_3$ ):  $\delta$  (ppm) = 143.9, 136.1, 135.2, 135.1, 134.6, 134.1, 131.9, 130.6, 130.2, 128.9, 127.6, 125.6. Spectral data were in accordance with the literature.<sup>[9]</sup>

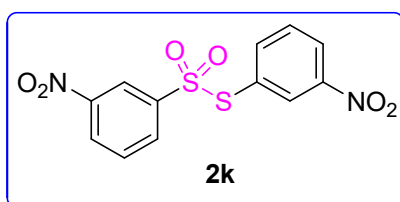

*S*-(3-nitrophenyl) 3-nitrobenzenesulfonylthioate (**2k**).

Yellow solid, yield 38.8 mg (57%); TLC (petroleum ether: AcOEt=2:1),  $R_f$  = 0.47.  $^1\text{H}$  NMR (400 MHz,  $\text{CDCl}_3$ ):  $\delta$  (ppm) = 8.49 (d,  $J=8.8$  Hz, 1H), 8.39 (d,  $J=8.0$  Hz, 1H), 8.35 (s, 1H), 8.14 (s, 1H), 7.93 (d,  $J=7.6$  Hz, 1H), 7.83 (d,  $J=7.6$  Hz, 1H), 7.76 (d,  $J=8.0$  Hz, 1H), 7.68 (d,  $J=8.0$  Hz, 1H);  $^{13}\text{C}$  NMR (101 MHz,  $\text{CDCl}_3$ ):  $\delta$  (ppm) = 148.3, 148.0, 144.1, 142.1, 132.5, 130.8, 130.7, 129.1, 128.5, 126.6, 122.5. Spectral data were in accordance with the literature.<sup>[10]</sup>

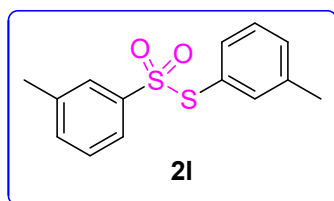

*S*-*m*-tolyl 3-methylbenzenesulfonylthioate (**2l**). Colorless

oil, yield 51.2 mg (92%); TLC (petroleum ether: AcOEt=20:1),  $R_f$  = 0.54.  $^1\text{H}$  NMR (400 MHz,  $\text{CDCl}_3$ ):  $\delta$  (ppm) = 7.24-7.37 (m, 5H), 7.17-7.21 (m, 1H), 7.11 (s, 2H);  $^{13}\text{C}$



NMR (101 MHz, CDCl<sub>3</sub>):  $\delta$  (ppm) = 142.7, 139.4, 139.0, 137.1, 134.4, 133.6, 132.2, 129.2, 128.6, 128.0, 127.5, 124.7. Spectral data were in accordance with the literature.<sup>[11]</sup>

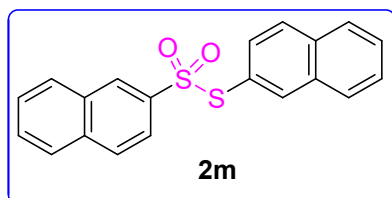

*S*-naphthalen-2-yl naphthalene-2-sulfonylthioate (**2m**).

White solid, yield 62.3 mg (89%); TLC (petroleum ether: AcOEt=10:1),  $R_f$  = 0.54. <sup>1</sup>H NMR (400 MHz, CDCl<sub>3</sub>):  $\delta$  (ppm) = 7.94 (s, 2H), 7.88 (d,  $J$ =8.4 Hz, 2H), 7.83 (s, 2H), 7.73 (d,  $J$ =8.4 Hz, 1H), 7.46-7.68 (m, 7H), 7.35 (d,  $J$ =8.4 Hz, 1H); <sup>13</sup>C NMR (101 MHz, CDCl<sub>3</sub>):  $\delta$  (ppm) = 139.7, 137.7, 135.1, 134.1, 133.2, 131.8, 131.6, 129.4, 129.3, 129.1, 128.4, 128.3, 127.9, 127.7, 127.6, 126.9, 125.1, 122.4. Spectral data were in accordance with the literature.<sup>[6]</sup>

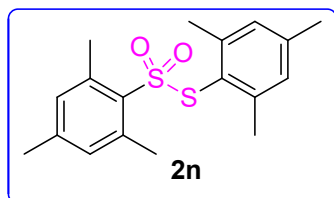

*S*-mesityl 2,4,6-trimethylbenzenesulfonylthioate (**2n**).

White solid, yield 56.8 mg (85%); TLC (petroleum ether: AcOEt=10:1),  $R_f$  = 0.60. <sup>1</sup>H NMR (400 MHz, CDCl<sub>3</sub>):  $\delta$  (ppm) = 6.88-6.89 (m, 4H), 2.35 (s, 6H), 2.29 (s, 3H), 2.27 (s, 3H), 2.15 (s, 6H); <sup>13</sup>C NMR (101 MHz, CDCl<sub>3</sub>):  $\delta$  (ppm) = 145.4, 143.5, 141.8, 139.7, 139.4, 131.9, 129.5, 123.3, 22.7, 21.5, 21.2, 21.1. Spectral data were in accordance with the literature.<sup>[6]</sup>

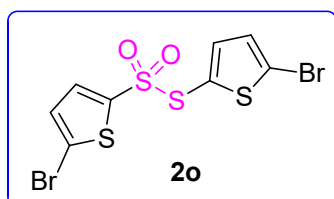

*S*-(5-bromothiophen-2-yl) 5-bromothiophene-2-

sulfonylthioate (**2o**). White solid, yield 58.5 mg (70%); TLC (petroleum ether:

AcOEt=20:1),  $R_f = 0.48$ .  $^1\text{H NMR}$  (400 MHz,  $\text{CDCl}_3$ ):  $\delta$  (ppm) = 7.20-7.21 (m, 1H), 7.05-7.11 (m, 3H);  $^{13}\text{C NMR}$  (101 MHz,  $\text{CDCl}_3$ ):  $\delta$  (ppm) = 142.8, 140.1, 134.6, 131.5, 130.3, 125.8, 123.3, 122.1, 22.7, 21.5, 21.2, 21.1. HRMS (ESI-QTOF) Calcd for  $\text{C}_8\text{H}_4\text{Br}_2\text{O}_2\text{S}_4\text{Na}$ ,  $[\text{M}+\text{Na}]^+$  440.7353; Found 440.7348.

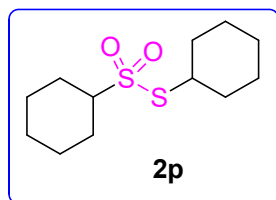

*S*-cyclohexyl cyclohexanesulfonylthioate (**2p**). Colorless oil,

yield 47.7 mg (91%); TLC (petroleum ether: AcOEt=20:1),  $R_f = 0.38$ .  $^1\text{H NMR}$  (400 MHz,  $\text{CDCl}_3$ ):  $\delta$  (ppm) = 3.47 (s, 1H), 3.02-3.08 (m, 1H), 2.30 (d,  $J=12.4$  Hz, 2H), 2.10 (d,  $J=12.0$  Hz, 2H), 1.94 (d,  $J=12.8$  Hz, 2H), 1.73 (s, 3H), 1.52-1.58 (m, 5H), 1.39-1.47 (m, 2H), 1.19-1.35 (m, 5H);  $^{13}\text{C NMR}$  (101 MHz,  $\text{CDCl}_3$ ):  $\delta$  (ppm) = 71.5, 50.4, 34.3, 26.2, 25.9, 25.2, 25.1, 25.0. Spectral data were in accordance with the literature.<sup>[11]</sup>

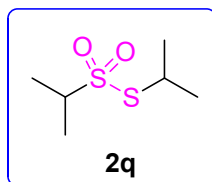

*S*-isopropyl propane-2-sulfonylthioate (**2q**). Colorless oil, yield 32.8

mg (90%); TLC (petroleum ether: AcOEt=20:1),  $R_f = 0.48$ .  $^1\text{H NMR}$  (400 MHz,  $\text{CDCl}_3$ ):  $\delta$  (ppm) = 3.63 (q,  $J=6.8$  Hz, 1H), 3.32 (q,  $J=6.8$  Hz, 1H), 1.42-1.43 (m, 12H);  $^{13}\text{C NMR}$  (101 MHz,  $\text{CDCl}_3$ ):  $\delta$  (ppm) = 63.5, 42.9, 24.2, 16.3. Spectral data were in accordance with the literature.<sup>[9]</sup>

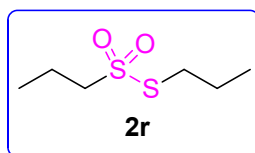

*S*-propyl propane-1-sulfonylthioate (**2r**). Colorless oil, yield 30.9

mg (85%); TLC (petroleum ether: AcOEt=10:1),  $R_f = 0.65$ .  $^1\text{H NMR}$  (400 MHz,  $\text{CDCl}_3$ ):  $\delta$  (ppm) = 3.27 (t,  $J=7.6$  Hz, 2H), 3.10 (q,  $J=6.8$  Hz, 2H), 1.93 (q,  $J=6.8$  Hz, 2H), 1.76 (q,  $J=6.8$  Hz, 2H), 1.05-1.09 (m, 3H), 1.00-1.04 (m, 3H);  $^{13}\text{C NMR}$  (101

MHz, CDCl<sub>3</sub>):  $\delta$  (ppm) = 64.3, 38.1, 23.2, 17.3, 13.1, 12.7. Spectral data were in accordance with the literature.<sup>[12]</sup>

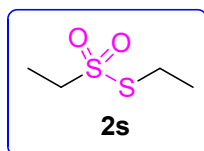

*S*-ethyl ethanesulfonylthioate (**2s**). Colorless oil, yield 25.3 mg (82%);

TLC (petroleum ether: AcOEt=6:1),  $R_f$  = 0.42. <sup>1</sup>H NMR (400 MHz, CDCl<sub>3</sub>):  $\delta$  (ppm) = 3.31 (q,  $J$ =7.6 Hz, 2H), 3.15 (q,  $J$ =7.2 Hz, 2H), 1.40-1.48 (m, 6H), 1.00-1.04 (m, 3H); <sup>13</sup>C NMR (101 MHz, CDCl<sub>3</sub>):  $\delta$  (ppm) = 57.1, 30.7, 15.2, 8.4. Spectral data were in accordance with the literature.<sup>[6]</sup>

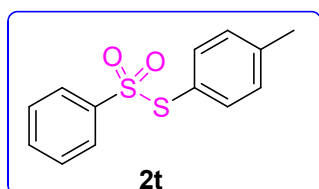

*S*-p-tolyl benzenesulfonylthioate (**2t**). Colorless oil, yield

15.9 mg (30%); TLC (petroleum ether: AcOEt=20:1),  $R_f$  = 0.52. <sup>1</sup>H NMR (400 MHz, CDCl<sub>3</sub>):  $\delta$  (ppm) = 7.53-7.55 (m, 3H), 7.39 (t,  $J$ =6.4 Hz, 1H), 7.18 (d,  $J$ =5.6 Hz, 2H), 7.10 (d,  $J$ =7.2 Hz, 2H), 2.34 (s, 3H); <sup>13</sup>C NMR (101 MHz, CDCl<sub>3</sub>):  $\delta$  (ppm) = 142.90, 142.2, 136.4, 133.6, 130.3, 128.8, 127.5, 124.3, 21.5. Spectral data were in accordance with the literature.<sup>[13]</sup>

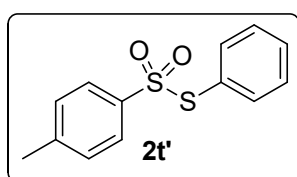

*S*-phenyl 4-methylbenzenesulfonylthioate (**2t'**)<sup>[14]</sup>. <sup>1</sup>H NMR

(400 MHz, CDCl<sub>3</sub>)  $\delta$  (ppm) = 7.49-7.45 (m, 3H), 7.40-7.34 (m, 4H), 7.22 (d,  $J$  = 8.1 Hz, 2H), 2.44 (s, 3H). <sup>13</sup>C NMR (100 MHz, CDCl<sub>3</sub>)  $\delta$  (ppm) = 144.7, 140.3, 136.6, 131.3, 129.4, 129.4, 128.0, 127.6, 21.7.

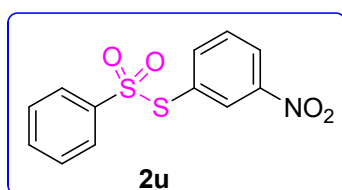

*S*-(3-nitrophenyl) benzenesulfonylthioate (**2u**). White solid,

yield 23.5 mg (40%); TLC (petroleum ether: AcOEt=6:1),  $R_f = 0.45$ .  $^1\text{H}$  NMR (400 MHz,  $\text{CDCl}_3$ ):  $\delta$  (ppm) = 8.32 (d,  $J=8.0$  Hz, 1H), 8.09 (s, 1H), 7.76 (s, 1H), 7.57-7.63 (m, 4H), 7.45-7.48 (m, 2H);  $^{13}\text{C}$  NMR (101 MHz,  $\text{CDCl}_3$ ):  $\delta$  (ppm) = 148.2, 142.3, 136.4, 134.4, 130.8, 130.4, 129.2, 127.5, 126.0. Spectral data were in accordance with the literature.<sup>[15]</sup>

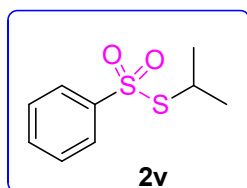

*S*-isopropyl benzenesulfonylthioate (**2v**). Colorless oil, yield 19.4 mg (45%); TLC (petroleum ether: AcOEt=10:1),  $R_f = 0.50$ .  $^1\text{H}$  NMR (400 MHz,  $\text{CDCl}_3$ ):  $\delta$  (ppm) = 7.87 (d,  $J=7.6$  Hz, 2H), 7.47-7.56 (m, 3H), 3.42 (q,  $J=6.8$  Hz, 2H), 1.23 (d,  $J=6.8$  Hz, 6H);  $^{13}\text{C}$  NMR (101 MHz,  $\text{CDCl}_3$ ):  $\delta$  (ppm) = 136.5, 133.7, 129.3, 126.8, 42.7, 23.5. HRMS (ESI-QTOF) Calcd for  $\text{C}_9\text{H}_{12}\text{O}_2\text{S}_2\text{Na}$ ,  $[\text{M}+\text{Na}]^+$  239.0171; Found 239.0165.

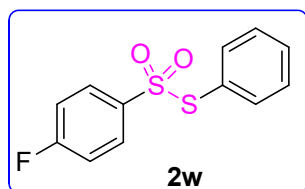

*S*-phenyl 4-fluorobenzenesulfonylthioate (**2w**). White solid, yield 22.0 mg (41%); TLC (petroleum ether: AcOEt=20:1),  $R_f = 0.38$ .  $^1\text{H}$  NMR (400 MHz,  $\text{CDCl}_3$ ):  $\delta$  (ppm) = 7.54-7.57 (m, 2H), 7.47-7.48 (m, 1H), 7.34-7.35 (m, 4H), 7.05-7.10 (m, 2H);  $^{13}\text{C}$  NMR (101 MHz,  $\text{CDCl}_3$ ):  $\delta$  (ppm) = 165.0 (d,  $J=255$  Hz), 138.9, 136.6, 131.6, 130.4 (d,  $J=10$  Hz), 129.6, 127.6, 116.0 (d,  $J=22$  Hz);  $^{19}\text{F}$  NMR (376 MHz,  $\text{CDCl}_3$ ):  $\delta$  (ppm) = -102.8. HRMS (ESI-QTOF) Calcd for  $\text{C}_{12}\text{H}_9\text{FO}_2\text{S}_2\text{Na}$ ,  $[\text{M}+\text{Na}]^+$  290.9920; Found 290.9918. Spectral data were in accordance with the literature.<sup>[16]</sup>

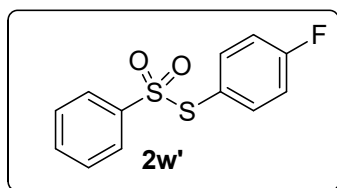

*S*-(4-fluorophenyl) benzenesulfonylthioate (**2w'**)<sup>[17]</sup>.  $^1\text{H}$  NMR (400 MHz,  $\text{CDCl}_3$ )  $\delta$  = 7.62-7.55 (m, 3H), 7.47-7.41(m, 2H), 7.37-7.29 (m, 2H),

7.07-6.98 (m, 2H).  $^{13}\text{C}$  NMR (100 MHz,  $\text{CDCl}_3$ )  $\delta$  = 164.8 (d,  $J$  = 253.9 Hz), 142.8, 138.9 (d,  $J$  = 9.0 Hz), 133.8, 128.9, 127.6, 123.5 (d,  $J$  = 3.3 Hz), 116.8 (d,  $J$  = 22.2 Hz).

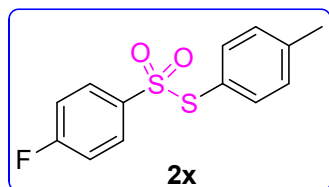

*S*-*p*-tolyl 4-fluorobenzenesulfonothioate (**2x**). White solid, yield 21.4 mg (38%); TLC (petroleum ether: AcOEt=20:1),  $R_f$  = 0.40.  $^1\text{H}$  NMR (400 MHz,  $\text{CDCl}_3$ ):  $\delta$  (ppm) = 7.55 (d,  $J$ =6.8 Hz, 2H), 7.21 (d,  $J$ =6.8 Hz, 2H), 7.13 (d,  $J$ =7.6 Hz, 2H), 7.05-7.09 (m, 2H), 2.36 (s, 3H);  $^{13}\text{C}$  NMR (101 MHz,  $\text{CDCl}_3$ ):  $\delta$  (ppm) = 165.1 (d,  $J$ =255 Hz), 142.4, 139.0, 136.4, 130.3 (d,  $J$ =10 Hz), 124.2, 116.1, 115.9, 21.5;  $^{19}\text{F}$  NMR (376 MHz,  $\text{CDCl}_3$ ):  $\delta$  (ppm) = -103.1. Spectral data were in accordance with the literature.<sup>[13]</sup>

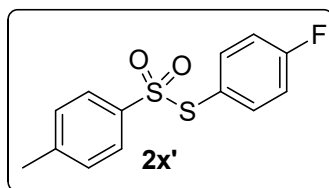

*S*-(4-fluorophenyl) 4-methylbenzenesulfonothioate (**2x'**)<sup>[14]</sup>.  $^1\text{H}$  NMR (400 MHz,  $\text{CDCl}_3$ )  $\delta$  = (ppm) 7.47 (d,  $J$  = 8.3 Hz, 2H), 7.36 (dd,  $J$  = 8.7, 5.2 Hz, 2H), 7.25 (d,  $J$  = 8.2 Hz, 2H), 7.05 (t,  $J$  = 8.6 Hz, 2H), 2.44 (s, 3H).  $^{13}\text{C}$  NMR (100 MHz,  $\text{CDCl}_3$ )  $\delta$  = (ppm) 164.8 (d,  $J$  = 253.7 Hz), 145.0, 140.0, 138.8 (d,  $J$  = 9.1 Hz), 129.5, 127.6, 123.6 (d,  $J$  = 3.3 Hz), 116.8 (d,  $J$  = 22.3 Hz), 21.7.

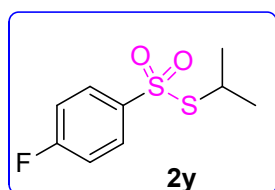

*S*-isopropyl 4-fluorobenzenesulfonothioate (**2y**). Colorless oil, yield 19.7 mg (42%); TLC (petroleum ether: AcOEt=20:1),  $R_f$  = 0.38.  $^1\text{H}$  NMR (400 MHz,  $\text{CDCl}_3$ ):  $\delta$  (ppm) = 7.87-7.88 (m, 2H), 7.15 (d,  $J$ =8.0 Hz, 2H), 3.42 (q,  $J$ =7.2 Hz, 1H), 1.24-1.25 (m, 6H);  $^{13}\text{C}$  NMR (101 MHz,  $\text{CDCl}_3$ ):  $\delta$  (ppm) = 165.3 (d,  $J$ =255 Hz), 138.9, 129.7, 116.4 (d,  $J$ =23 Hz), 42.9, 23.5;  $^{19}\text{F}$  NMR (376 MHz,  $\text{CDCl}_3$ ):  $\delta$  (ppm) = -103.4. HRMS (ESI-QTOF) Calcd for  $\text{C}_9\text{H}_{11}\text{FO}_2\text{S}_2\text{Na}$ ,  $[\text{M}+\text{Na}]^+$  257.0077;

Found 257.0072.

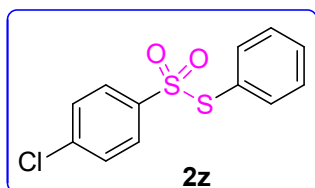

*S*-phenyl 4-chlorobenzenesulfonylthioate (**2z**). White solid, yield 21.3 mg (43%); TLC (petroleum ether: AcOEt=20:1),  $R_f = 0.45$ .  $^1\text{H}$  NMR (400 MHz,  $\text{CDCl}_3$ ):  $\delta$  (ppm) = 7.46-7.48 (m, 3H), 7.36-7.38 (m, 6H);  $^{13}\text{C}$  NMR (101 MHz,  $\text{CDCl}_3$ ):  $\delta$  (ppm) = 141.3, 140.3, 136.5, 131.7, 129.6, 129.1, 128.9, 127.5. Spectral data were in accordance with the literature.<sup>[11]</sup>

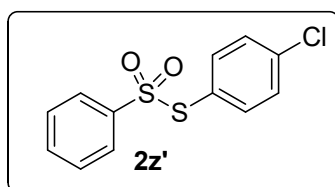

*S*-(4-chlorophenyl) benzenesulfonylthioate (**2z'**)<sup>[17]</sup>.  $^1\text{H}$  NMR (400 MHz,  $\text{CDCl}_3$ )  $\delta = 7.64$ -7.56 (m, 3H), 7.48-7.43 (m, 2H), 7.34-7.26 (m, 4H).  $^{13}\text{C}$  NMR (100 MHz,  $\text{CDCl}_3$ )  $\delta = 142.8$ , 138.3, 137.7, 133.8, 129.7, 128.9, 127.6, 126.3.

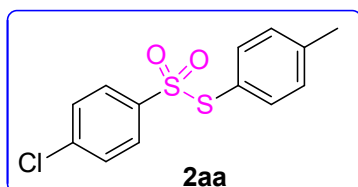

*S*-*p*-tolyl 4-chlorobenzenesulfonylthioate (**2aa**). White solid, yield 22.1 mg (37%); TLC (petroleum ether: AcOEt=20:1),  $R_f = 0.45$ .  $^1\text{H}$  NMR (400 MHz,  $\text{CDCl}_3$ ):  $\delta$  (ppm) = 7.49 (d,  $J=8.8$  Hz, 2H), 7.38 (d,  $J=8.8$  Hz, 2H), 7.24 (d,  $J=7.6$  Hz, 2H), 7.15 (d,  $J=7.6$  Hz, 2H), 2.38 (s, 3H);  $^{13}\text{C}$  NMR (101 MHz,  $\text{CDCl}_3$ ):  $\delta$  (ppm) = 142.5, 141.5, 140.2, 136.4, 130.4, 129.1, 128.9, 124.1, 21.5. Spectral data were in accordance with the literature.<sup>[13]</sup>

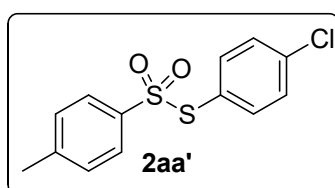

*S*-(4-chlorophenyl) 4-methylbenzenesulfonylthioate (**2aa'**)<sup>[14]</sup>.  $^1\text{H}$  NMR (400 MHz,  $\text{CDCl}_3$ )  $\delta =$  (ppm) 7.48 (d,  $J = 8.3$  Hz, 2H), 7.35-7.30 (m, 4H), 7.25 (d,  $J = 8.2$  Hz, 2H), 2.45 (s, 3H).  $^{13}\text{C}$  NMR (100 MHz,  $\text{CDCl}_3$ )  $\delta =$

(ppm) 145.1, 140.1, 138.2, 137.7, 129.7, 129.6, 127.6, 126.5, 21.7.

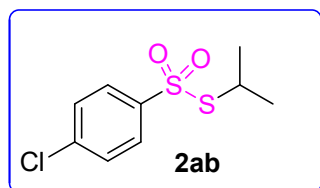

*S*-isopropyl 4-chlorobenzenesulfonothioate (**2ab**). White solid, yield 21.0 mg (42%); TLC (petroleum ether: AcOEt=20:1),  $R_f = 0.54$ .  $^1\text{H}$  NMR (400 MHz,  $\text{CDCl}_3$ ):  $\delta$  (ppm) = 7.84 (d,  $J=8.0$  Hz, 2H), 7.48 (d,  $J=8.4$  Hz, 2H), 3.46 (q,  $J=6.8$  Hz, 1H), 1.28 (d,  $J=6.8$  Hz, 6H);  $^{13}\text{C}$  NMR (101 MHz,  $\text{CDCl}_3$ ):  $\delta$  (ppm) = 143.9, 140.0, 129.5, 128.3, 42.9, 23.5. HRMS (ESI-QTOF) Calcd for  $\text{C}_9\text{H}_{11}\text{ClO}_2\text{S}_2\text{Na}$ ,  $[\text{M}+\text{Na}]^+$  272.9781; Found 272.9774.

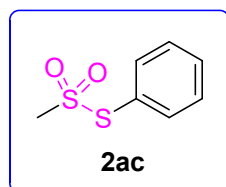

*S*-phenyl methanesulfonothioate (**2ac**). White solid, yield 14.7 mg (39%); TLC (petroleum ether: AcOEt=15:1),  $R_f = 0.41$ .  $^1\text{H}$  NMR (400 MHz,  $\text{CDCl}_3$ ):  $\delta$  (ppm) = 7.69-7.71 (m, 2H), 7.53-7.56 (m, 1H), 7.46-7.49 (m, 2H), 3.17 (s, 3H);  $^{13}\text{C}$  NMR (101 MHz,  $\text{CDCl}_3$ ):  $\delta$  (ppm) = 136.2, 131.7, 129.9, 127.9, 47.5. Spectral data were in accordance with the literature.<sup>[6]</sup>

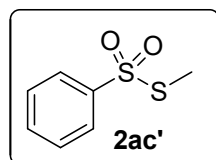

*S*-methyl benzenesulfonothioate (**2ac'**)<sup>[18]</sup>.  $^1\text{H}$  NMR (400 MHz,  $\text{CDCl}_3$ )  $\delta$  = 7.93 (dd,  $J = 8.4, 1.3$  Hz, 2H), 7.70 – 7.61 (m, 1H), 7.57 (dd,  $J = 8.3, 6.9$  Hz, 2H), 2.51 (s, 3H).

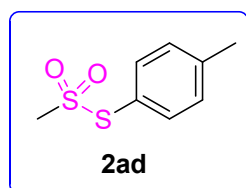

*S*-phenyl methanesulfonothioate (**2ad**). Colorless oil, yield 18.6 mg (46%); TLC (petroleum ether: AcOEt=15:1),  $R_f = 0.45$ .  $^1\text{H}$  NMR (400 MHz,  $\text{CDCl}_3$ ):  $\delta$  (ppm) = 7.57 (d,  $J=8.0$  Hz, 2H), 7.27 (d,  $J=8.0$  Hz, 1H), 3.15 (s, 3H), 2.40

(s, 3H);  $^{13}\text{C}$  NMR (101 MHz,  $\text{CDCl}_3$ ):  $\delta$  (ppm) = 142.5, 136.2, 130.7, 124.5, 47.2, 21.5. Spectral data were in accordance with the literature.<sup>[6]</sup>

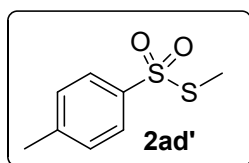

*S*-methyl 4-methylbenzenesulfonothioate (**2ad'**)<sup>[19]</sup>.  $^1\text{H}$  NMR (500 MHz,  $\text{CDCl}_3$ )  $\delta$  = 7.80 (d, 2H,  $J$  = 8.3 Hz), 7.36 (d, 2H,  $J$  = 8.3 Hz), 2.50 (s, 3H), 2.46 (s, 3H);  $^{13}\text{C}$  NMR (126 MHz,  $\text{CDCl}_3$ )  $\delta$  = 144.9, 140.9, 129.9, 127.2, 21.7, 18.1.

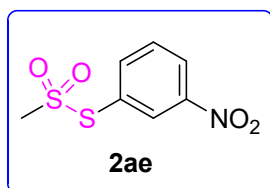

*S*-(3-nitrophenyl) methanesulfonothioate (**2ae**). Colorless oil, yield 14.0 mg (30%); TLC (petroleum ether: AcOEt=2:1),  $R_f$  = 0.32.  $^1\text{H}$  NMR (400 MHz,  $\text{CDCl}_3$ ):  $\delta$  (ppm) = 8.53 (s, 1H), 8.37 (d,  $J$ =6.8 Hz, 1H), 8.05 (d,  $J$ =6.0 Hz, 1H), 7.69-7.75 (m, 1H), 3.26 (s, 3H);  $^{13}\text{C}$  NMR (101 MHz,  $\text{CDCl}_3$ ):  $\delta$  (ppm) = 148.6, 142.0, 130.9, 130.5, 130.0, 126.3, 48.4. Spectral data were in accordance with the literature.<sup>[20]</sup>

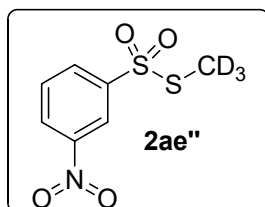

(**2ae''**)<sup>[21]</sup>:  $^1\text{H}$  NMR (400 MHz,  $\text{CDCl}_3$ )  $\delta$  = 8.67 (1H, s), 8.48 (1H, d,  $J$  = 8.2 Hz), 8.23 (1H, d,  $J$  = 7.8 Hz), 7.87-7.82 (1H, m);  $^{13}\text{C}$  NMR (101 MHz,  $\text{CDCl}_3$ )  $\delta$  = 148.2, 145.3, 132.4, 131.0, 128.2, 122.1, 18.2-17.3 (m, C-D<sub>3</sub>).

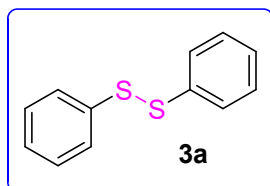

1,2-diphenyldisulfane (**3a**). White solid, yield 38.4 mg (88%); TLC (petroleum ether),  $R_f$  = 0.81.  $^1\text{H}$  NMR (400 MHz,  $\text{CDCl}_3$ ):  $\delta$  (ppm) = 7.53 (d,  $J$ =6.8 Hz, 4H), 7.32 (t,  $J$ =7.6 Hz, 4H), 7.22-7.26 (m, 2H);  $^{13}\text{C}$  NMR (101 MHz,  $\text{CDCl}_3$ ):  $\delta$  (ppm) = 137.1, 129.1, 127.5, 127.2. Spectral data were in accordance with



the literature.<sup>[6]</sup>

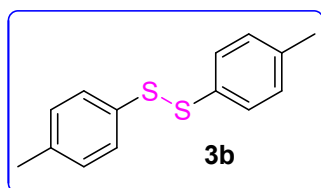

*1,2-di-p-tolyl disulfane (3b)*. White solid, yield 46.3 mg (94%); TLC (petroleum ether),  $R_f = 0.84$ .  $^1\text{H NMR}$  (400 MHz,  $\text{CDCl}_3$ ):  $\delta$  (ppm) = 7.40 (d,  $J=7.6$  Hz, 4H), 7.20 (d,  $J=7.6$  Hz, 4H), 2.34 (s, 6H);  $^{13}\text{C NMR}$  (101 MHz,  $\text{CDCl}_3$ ):  $\delta$  (ppm) = 137.4, 133.9, 129.8, 128.5, 21.1. Spectral data were in accordance with the literature.<sup>[6]</sup>

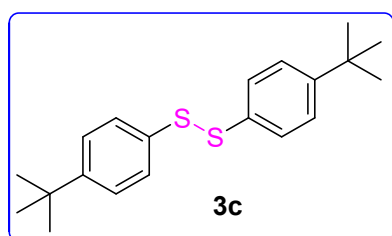

*1,2-bis(4-(tert-butyl)phenyl) disulfane (3c)*. White solid, yield 60.1 mg (91%); TLC (petroleum ether),  $R_f = 0.92$ .  $^1\text{H NMR}$  (400 MHz,  $\text{CDCl}_3$ ):  $\delta$  (ppm) = 7.44 (s, 4H), 7.33 (s, 4H), 1.29 (s, 18H);  $^{13}\text{C NMR}$  (101 MHz,  $\text{CDCl}_3$ ):  $\delta$  (ppm) = 150.5, 133.9, 127.7, 126.1, 34.5, 31.3. Spectral data were in accordance with the literature.<sup>[6]</sup>

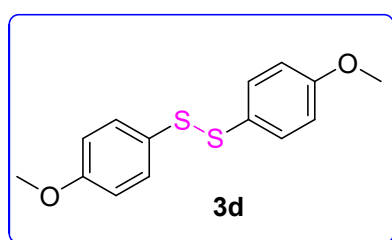

*1,2-bis(4-methoxyphenyl) disulfane (3d)*. White solid, yield 50.0 mg (90%); TLC (petroleum ether:AcOEt=20:1),  $R_f = 0.25$ .  $^1\text{H NMR}$  (400 MHz,  $\text{CDCl}_3$ ):  $\delta$  (ppm) = 7.41 (d,  $J=7.6$  Hz, 4H), 6.84 (d,  $J=7.6$  Hz, 4H), 3.80 (s, 6H);  $^{13}\text{C NMR}$  (101 MHz,  $\text{CDCl}_3$ ):  $\delta$  (ppm) = 159.9, 132.7, 128.4, 114.6, 55.4. Spectral data were in accordance with the literature.<sup>[6]</sup>

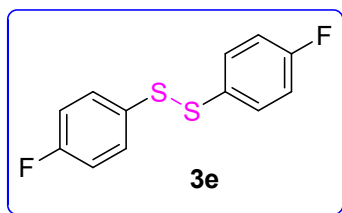

*1,2-bis(4-fluorophenyl)disulfane (3e)*. Colorless oil, yield 46.7 mg (92%); TLC (petroleum ether),  $R_f = 0.85$ .  $^1\text{H NMR}$  (400 MHz,  $\text{CDCl}_3$ ):  $\delta$  (ppm) = 7.43-7.44 (m, 4H), 6.99-7.02 (m, 4H);  $^{13}\text{C NMR}$  (101 MHz,  $\text{CDCl}_3$ ):  $\delta$  (ppm) = 156.4, 131.3, 131.2, 116.2 (d,  $J=22$  Hz);  $^{19}\text{F NMR}$  (376 MHz,  $\text{CDCl}_3$ ):  $\delta$  (ppm) = -113.5. Spectral data were in accordance with the literature.<sup>[6]</sup>

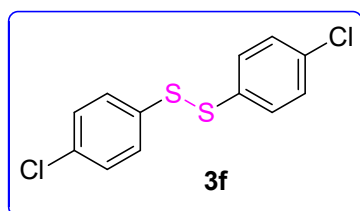

*1,2-bis(4-chlorophenyl)disulfane (3f)*. White solid, yield 50.9 mg (89%); TLC (petroleum ether),  $R_f = 0.90$ .  $^1\text{H NMR}$  (400 MHz,  $\text{CDCl}_3$ ):  $\delta$  (ppm) = 7.39 (s, 4H), 7.26 (s, 4H);  $^{13}\text{C NMR}$  (101 MHz,  $\text{CDCl}_3$ ):  $\delta$  (ppm) = 135.1, 133.6, 129.3, 129.2. Spectral data were in accordance with the literature.<sup>[6]</sup>

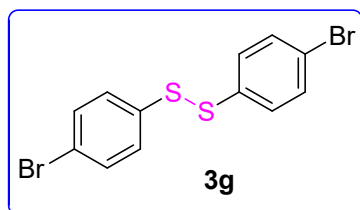

*1,2-bis(4-bromophenyl)disulfane (3g)*. White solid, yield 44.9 mg (60%); TLC (petroleum ether),  $R_f = 0.91$ .  $^1\text{H NMR}$  (400 MHz,  $\text{CDCl}_3$ ):  $\delta$  (ppm) = 7.42 (d,  $J=8.0$  Hz, 4H), 7.34 (d,  $J=7.6$  Hz, 4H);  $^{13}\text{C NMR}$  (101 MHz,  $\text{CDCl}_3$ ):  $\delta$  (ppm) = 135.7, 132.2, 129.4, 121.6. Spectral data were in accordance with the literature.<sup>[6]</sup>

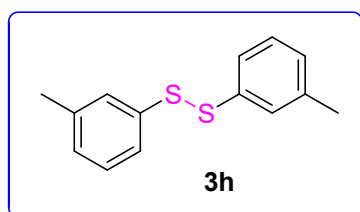

*1,2-di-m-tolyldisulfane (3h)*. Colorless oil, yield 44.7 mg

(91%); TLC (petroleum ether),  $R_f = 0.90$ .  $^1\text{H}$  NMR (400 MHz,  $\text{CDCl}_3$ ):  $\delta$  (ppm) = 7.34-7.36 (m, 4H), 7.22 (t,  $J=7.2$  Hz, 2H), 7.06 (d,  $J=7.6$  Hz, 2H);  $^{13}\text{C}$  NMR (101 MHz,  $\text{CDCl}_3$ ):  $\delta$  (ppm) = 138.9, 136.9, 128.9, 128.04, 128.03, 124.6, 21.4. Spectral data were in accordance with the literature.<sup>[22]</sup>

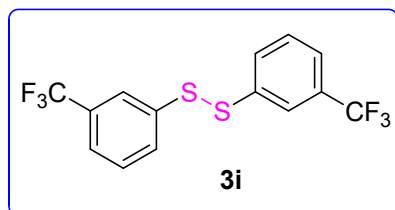

*1,2-bis(3-(trifluoromethyl)phenyl)disulfane* (**3i**).

Colorless oil, yield 63.7 mg (90%); TLC (petroleum ether),  $R_f = 0.81$ .  $^1\text{H}$  NMR (400 MHz,  $\text{CDCl}_3$ ):  $\delta$  (ppm) = 7.76 (s, 2H), 7.67 (d,  $J=7.6$  Hz, 2H), 7.51 (d,  $J=7.6$  Hz, 2H), 7.45 (t,  $J=7.6$  Hz, 2H);  $^{13}\text{C}$  NMR (101 MHz,  $\text{CDCl}_3$ ):  $\delta$  (ppm) = 137.7, 131.6 (d,  $J=32$  Hz), 130.6, 129.7, 124.9, 124.2 (q,  $J=2$  Hz), 122.2;  $^{19}\text{F}$  NMR (376 MHz,  $\text{CDCl}_3$ ):  $\delta$  (ppm) = -62.9. Spectral data were in accordance with the literature.<sup>[23]</sup>

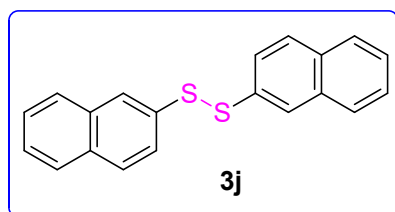

*1,2-di(naphthalen-2-yl)disulfane* (**3j**). White solid,

yield 55.3 mg (87%); TLC (petroleum ether),  $R_f = 0.75$ .  $^1\text{H}$  NMR (400 MHz,  $\text{CDCl}_3$ ):  $\delta$  (ppm) = 7.99 (s, 2H), 7.75-7.80 (m, 6H), 7.64 (s, 2H), 7.47 (s, 4H);  $^{13}\text{C}$  NMR (101 MHz,  $\text{CDCl}_3$ ):  $\delta$  (ppm) = 134.2, 133.4, 132.5, 128.9, 127.7, 127.4, 126.7, 126.5, 126.2, 125.6. Spectral data were in accordance with the literature.<sup>[6]</sup>

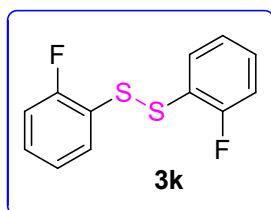

*1,2-bis(2-fluorophenyl)disulfane* (**3k**). Colorless oil, yield 45.7

mg (90%); TLC (petroleum ether),  $R_f = 0.80$ .  $^1\text{H}$  NMR (400 MHz,  $\text{CDCl}_3$ ):  $\delta$  (ppm) = 7.57 (t,  $J=7.6$  Hz, 2H), 7.23-7.28 (m, 2H), 7.03-7.12 (m, 4H);  $^{13}\text{C}$  NMR (101 MHz,  $\text{CDCl}_3$ ):  $\delta$  (ppm) = 160.0 (d,  $J=246$  Hz), 131.2, 129.7 (d,  $J=8$  Hz), 124.7 (d,  $J=4$  Hz),

123.5 (d,  $J=17$  Hz), 115.7 (d,  $J=24$  Hz);  $^{19}\text{F}$  NMR (376 MHz,  $\text{CDCl}_3$ ):  $\delta$  (ppm) = -109.9. Spectral data were in accordance with the literature.<sup>[24]</sup>

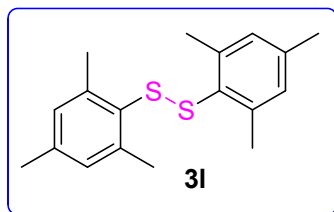

*1,2-dimesityldisulfane (31)*. White solid, yield 49.5 mg (82%); TLC (petroleum ether),  $R_f = 0.95$ .  $^1\text{H}$  NMR (400 MHz,  $\text{CDCl}_3$ ):  $\delta$  (ppm) = 6.84 (s, 4H), 2.21 (s, 18H);  $^{13}\text{C}$  NMR (101 MHz,  $\text{CDCl}_3$ ):  $\delta$  (ppm) = 143.2, 139.2, 131.5, 128.8, 21.4, 21.1. Spectral data were in accordance with the literature.<sup>[6]</sup>

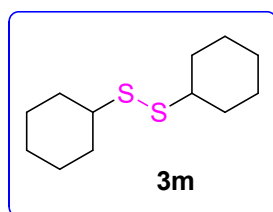

*1,2-dicyclohexyldisulfane (3m)*. Colorless oil, yield 42.3 mg (92%); TLC (petroleum ether),  $R_f = 0.86$ .  $^1\text{H}$  NMR (400 MHz,  $\text{CDCl}_3$ ):  $\delta$  (ppm) = 2.68 (s, 2H), 2.03 (s, 4H), 1.79 (s, 4H), 1.56-1.63 (m, 4H), 1.25-1.31 (m, 8H). Spectral data were in accordance with the literature.<sup>[25]</sup>

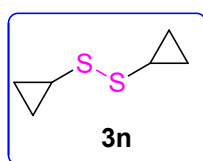

*1,2-dicyclopropyldisulfane (3n)*. Colorless oil, yield 24.8 mg (85%); TLC (petroleum ether),  $R_f = 0.90$ .  $^1\text{H}$  NMR (400 MHz,  $\text{CDCl}_3$ ):  $\delta$  (ppm) = 3.25-3.29 (m, 2H), 1.59 (s, 4H), 1.35 (d,  $J=7.6$  Hz, 4H);  $^{13}\text{C}$  NMR (101 MHz,  $\text{CDCl}_3$ ):  $\delta$  (ppm) = 43.2, 9.2. HRMS (ESI-QTOF) Calcd for  $\text{C}_6\text{H}_{10}\text{S}_2\text{Na}$ ,  $[\text{M}+\text{Na}]^+$  169.0116; Found 169.0113.

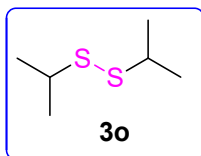

*1,2-diisopropyldisulfane (3o)*. Colorless oil, yield 27.6 mg (92%);

TLC (petroleum ether),  $R_f = 0.90$ .  $^1\text{H}$  NMR (400 MHz,  $\text{CDCl}_3$ ):  $\delta$  (ppm) = 2.93-2.96 (m, 2H), 1.27 (d,  $J=5.2$  Hz, 12H);  $^{13}\text{C}$  NMR (101 MHz,  $\text{CDCl}_3$ ):  $\delta$  (ppm) = 41.4, 22.6.

Spectral data were in accordance with the literature.<sup>[26]</sup>

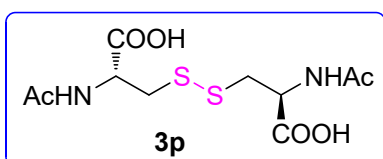

*(S)-2-acetamido-3-(((R)-2-acetamido-2-*

*carboxyethyl)disulfanyl)propanoic acid (3p)*. White solid, yield 39.5 mg (61%); TLC

(AcOEt:DCM=1:1),  $R_f = 0.21$ .  $^1\text{H}$  NMR (400 MHz,  $\text{D}_6\text{-DMSO}$ ):  $\delta$  (ppm) = 8.27 (s, 2H), 2.71-2.77 (m, 4H), 2.19 (s, 2H), 1.84 (s, 6H);  $^{13}\text{C}$  NMR (101 MHz,  $\text{D}_6\text{-DMSO}$ ):

$\delta$  (ppm) = 172.3, 171.6, 54.8, 25.7, 22.5. HRMS (ESI-QTOF) Calcd for  $\text{C}_{10}\text{H}_{16}\text{N}_2\text{O}_6\text{S}_2\text{Na}$ ,  $[\text{M}+\text{Na}]^+$  347.0342; Found 347.0338.

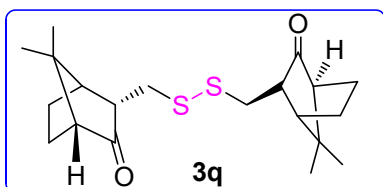

*(1S,3S)-3-((((1R,2R,4R)-7,7-dimethyl-3-*

*oxobicyclo[2.2.1]heptan-2-yl)methyl)disulfanyl)methyl)-7,7-*

*dimethylbicyclo[2.2.1]heptan-2-one (3q)*. White solid, yield 36.6 mg (50%); TLC

(petroleum ether:AcOEt=10:1),  $R_f = 0.48$ .  $^1\text{H}$  NMR (400 MHz,  $\text{CDCl}_3$ ):  $\delta$  (ppm) = 4.23 (d,  $J=14.8$  Hz, 2H), 3.69 (d,  $J=14.8$  Hz, 2H), 2.35-2.40 (m, 4H), 2.12 (s, 2H),

2.04 (s, 2H), 1.91-1.96 (m, 2H), 1.71-1.73 (m, 2H), 1.41-1.46 (m, 2H), 1.07 (s, 6H), 0.86 (s, 6H);  $^{13}\text{C}$  NMR (101 MHz,  $\text{CDCl}_3$ ):  $\delta$  (ppm) = 212.8, 64.3, 59.6, 48.2, 42.7,

42.3, 26.8, 25.2, 19.6, 19.5. HRMS (ESI-QTOF) Calcd for  $\text{C}_{20}\text{H}_{30}\text{O}_2\text{S}_2\text{Na}$ ,  $[\text{M}+\text{Na}]^+$  389.1579; Found 389.1572.

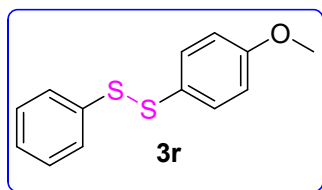

*1-(4-methoxyphenyl)-2-phenyldisulfane (3r)*. Colorless oil, yield 23.8 mg (48%); TLC (petroleum ether:AcOEt=15:1),  $R_f = 0.35$ .  $^1\text{H}$  NMR (400 MHz,  $\text{CDCl}_3$ ):  $\delta$  (ppm) = 7.51 (d,  $J=7.2$  Hz, 2H), 7.42 (d,  $J=7.2$  Hz, 2H), 7.29-7.33 (m, 2H), 7.23-7.25 (m, 1H), 6.82-6.84 (m 2H), 3.78 (s, 3H);  $^{13}\text{C}$  NMR (101 MHz,  $\text{CDCl}_3$ ):  $\delta$  (ppm) = 159.8, 137.5, 132.7, 131.8, 129.0, 128.2, 127.2, 114.7, 55.4. Spectral data were in accordance with the literature.<sup>[27]</sup>

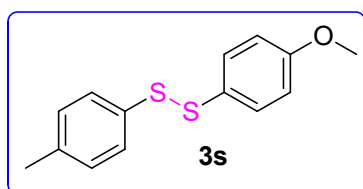

*1-(4-methoxyphenyl)-2-phenyldisulfane (3s)*. Colorless oil, yield 26.2 mg (50%); TLC (petroleum ether:AcOEt=15:1),  $R_f = 0.37$ .  $^1\text{H}$  NMR (400 MHz,  $\text{CDCl}_3$ ):  $\delta$  (ppm) = 7.39-7.44 (m, 4H), 7.12 (d,  $J=8.0$  Hz, 2H), 6.84 (d,  $J=8.8$  Hz, 2H), 3.79 (s, 3H), 2.34 (s, 3H);  $^{13}\text{C}$  NMR (101 MHz,  $\text{CDCl}_3$ ):  $\delta$  (ppm) = 159.8, 137.6, 134.1, 132.0, 129.8, 129.2, 114.6, 55.4, 21.1. Spectral data were in accordance with the literature.<sup>[27]</sup>

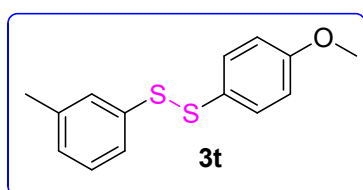

*1-(4-methoxyphenyl)-2-(m-tolyl)disulfane (3t)*. Colorless oil, yield 23.6 mg (45%); TLC (petroleum ether:AcOEt=40:1),  $R_f = 0.31$ .  $^1\text{H}$  NMR (400 MHz,  $\text{CDCl}_3$ ):  $\delta$  (ppm) = 7.43 (d,  $J=9.2$  Hz, 2H), 7.33 (s, 2H), 7.21 (t,  $J=8.0$  Hz, 1H), 7.08 (d,  $J=7.2$  Hz, 1H), 6.84 (d,  $J=8.8$  Hz, 2H), 3.79 (s, 3H), 2.34 (s, 3H);  $^{13}\text{C}$  NMR (101 MHz,  $\text{CDCl}_3$ ):  $\delta$  (ppm) = 159.7, 138.9, 137.2, 131.7, 128.9, 128.7, 128.2, 128.1, 125.2, 114.7, 55.4, 21.4. Spectral data were in accordance with the literature.<sup>[28]</sup>

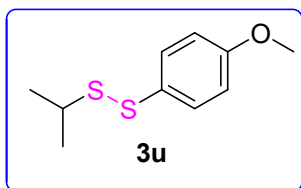

*1-isopropyl-2-(4-methoxyphenyl)disulfane (3u)*. Colorless oil, yield 16.7 mg (39%); TLC (petroleum ether:AcOEt=20:1),  $R_f = 0.56$ .  $^1\text{H}$  NMR (400 MHz,  $\text{CDCl}_3$ ):  $\delta$  (ppm) = 7.48 (d,  $J=7.2$  Hz, 2H), 6.85 (d,  $J=8.8$  Hz, 2H), 3.80 (s, 3H), 3.05 (q,  $J=6.8$  Hz, 1H), 1.29 (d,  $J=6.8$  Hz, 6H);  $^{13}\text{C}$  NMR (101 MHz,  $\text{CDCl}_3$ ):  $\delta$  (ppm) = 159.2, 130.9, 129.1, 114.5, 55.4, 41.3, 22.4. Spectral data were in accordance with the literature.<sup>[29]</sup>

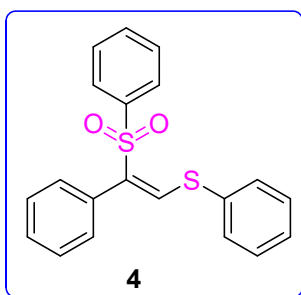

*(Z)-phenyl(2-phenyl-2-(phenylsulfonyl)vinyl)sulfane (4)*.

Yellow solid, yield 63.4 mg (90%); TLC (petroleum ether:AcOEt=5:1),  $R_f = 0.56$ .  $^1\text{H}$  NMR (400 MHz,  $\text{CDCl}_3$ ):  $\delta$  (ppm) = 8.15 (s, 1H), 7.62 (d,  $J=7.6$  Hz, 2H), 7.47-7.54 (m, 3H), 7.33-7.41 (m, 8H), 7.21 (d,  $J=6.0$  Hz, 2H);  $^{13}\text{C}$  NMR (101 MHz,  $\text{CDCl}_3$ ):  $\delta$  (ppm) = 144.0, 139.2, 135.9, 133.1, 132.7, 131.2, 130.5, 130.2, 129.6, 129.4, 128.8, 128.7, 128.2. Spectral data were in accordance with the literature.<sup>[2]</sup>

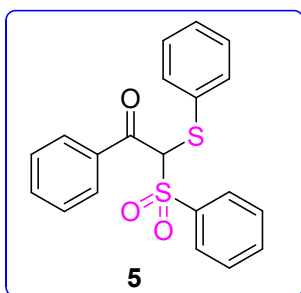

*1-phenyl-2-(phenylsulfonyl)-2-(phenylthio)ethanone (5)*.

White solid, yield 63.3 mg (86%); TLC (petroleum ether:AcOEt=4:1),  $R_f = 0.34$ .  $^1\text{H}$  NMR (400 MHz,  $\text{CDCl}_3$ ):  $\delta$  (ppm) = 8.00 (d,  $J=8.0$  Hz, 2H), 7.86 (d,  $J=8.0$  Hz, 2H), 7.42-7.65 (m, 8H), 7.24-7.29 (m, 3H), 5.83 (s, 2H);  $^{13}\text{C}$  NMR (101 MHz,  $\text{CDCl}_3$ ):  $\delta$  (ppm) = 189.2, 136.3, 135.0, 134.5, 134.4, 133.6, 131.9, 130.7, 129.5, 129.4, 129.2,

128.9, 128.7, 75.4. Spectral data were in accordance with the literature.<sup>[3]</sup>

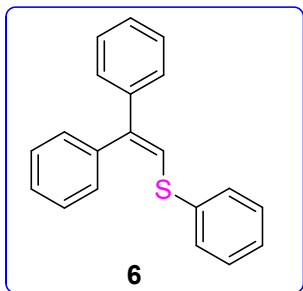

(2,2-diphenylvinyl)(phenyl)sulfane (**6**). Colorless oil, yield 54.7 mg (95%); TLC (petroleum ether),  $R_f = 0.68$ .  $^1\text{H}$  NMR (400 MHz,  $\text{CDCl}_3$ ):  $\delta$  (ppm) = 7.49-7.53 (m, 4H), 7.40-7.46 (m, 3H), 7.32-7.38 (m, 8H), 6.96 (s, 1H);  $^{13}\text{C}$  NMR (101 MHz,  $\text{CDCl}_3$ ):  $\delta$  (ppm) = 141.5, 141.1, 139.2, 136.6, 129.8, 129.6, 129.2, 128.5, 128.4, 127.9, 127.4, 127.3, 126.8, 124.2. Spectral data were in accordance with the literature.<sup>[4]</sup>

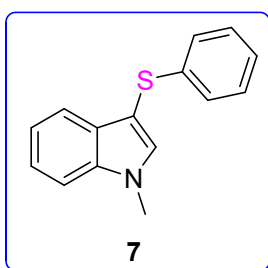

1-methyl-3-(phenylthio)-1H-indole (**7**). White solid, yield 40.2 mg 84%); TLC (petroleum ether:AcOEt=20:1),  $R_f = 0.45$ .  $^1\text{H}$  NMR (400 MHz,  $\text{CDCl}_3$ ):  $\delta$  (ppm) = 7.66 (d,  $J=8.0$  Hz, 1H), 7.41 (d,  $J=8.0$  Hz, 1H), 7.32-7.35 (m, 2H), 7.14-7.23 (m, 5H), 7.08 (t,  $J=6.8$  Hz, 1H);  $^{13}\text{C}$  NMR (101 MHz,  $\text{CDCl}_3$ ):  $\delta$  (ppm) = 139.7, 137.6, 135.1, 129.8, 128.7, 125.7, 124.7, 122.6, 120.5, 119.7, 100.5, 33.1. Spectral data were in accordance with the literature.<sup>[5]</sup>

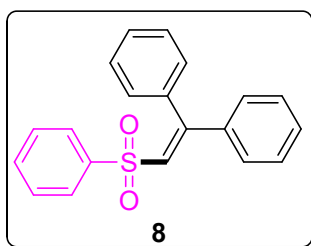

(2-(phenylsulfonyl)ethene-1,1-diyl)dibenzene (**8**). Colorless oil, yield 14.7 mg (23%); TLC (petroleum ether: AcOEt=5:1),  $R_f = 0.32$ .  $^1\text{H}$  NMR (400 MHz,  $\text{CDCl}_3$ ):  $\delta$  (ppm) = 7.58 (d,  $J= 8.0$  Hz, 2H), 7.46-7.50 (m, 1H), 7.27-7.38



(m, 8H), 7.21 (d,  $J = 7.2$  Hz, 2H), 7.07-7.09 (m, 2H), 6.87 (s, 1H), 7.04 (s, 1H);  $^{13}\text{C}$  NMR (101 MHz,  $\text{CDCl}_3$ ):  $\delta$  (ppm) = 155.2, 141.4, 139.1, 135.5, 132.9, 130.4, 129.8, 128.9, 128.73, 128.70, 128.6, 128.2, 127.9, 127.6. Spectral data were in accordance with the literature.<sup>[30]</sup>

#### 14. References

- (1) Marcoux, P. R.; Hasenknopf, B.; Vaissermann, J.; Gouzerh, P. *Eur. J. Inorg. Chem.* **2003**, 2406–2412.
- (2) Kumari, A. H.; Kumar, J. J.; Krishna, G. R.; Reddy, R. J. *Synthesis* **2021**, 53, 2850–2864.
- (3) Huang, S.; Thirupathi, N.; Tung, C.-H.; Xu, Z. *J. Org. Chem.* **2018**, 83, 9449–9455.
- (4) Mukherjee, N.; Chatterjee, T. *Green Chem.* **2023**, 25, 8798–8807.
- (5) Qin, J.; Zuo, H.; Ni, Y.; Yu, Q.; Zhong, F. *ACS Sustainable Chem. Eng.* **2020**, 8, 12342–12347.
- (6) Zheng, Y.; Qing, F.-L.; Huang, Y.; Xu, X.-H. *Adv. Synth. Catal.* **2016**, 358, 3477–3481.
- (7) Pandey, A. K.; Kumar, A.; Srivastava, S. K. *Russ. J. Org. Chem.* **2022**, 58, 844–849.
- (8) Lü, S.; Wang, Z.; Gao, X.; Chen, K.; Zhu, S. *Angew. Chem. Int. Ed.* **2023**, 62, e202300268.
- (9) Lv, M.; Liu, Y.; Li, K.; Yang, G. *Tetrahedron Lett.* **2021**, 65, 152757.
- (10) Liu, Y.; Zhang, Y. *Tetrahedron Lett.* **2003**, 44, 4291–4294.
- (11) Natarajan, P. *Tetrahedron Lett.* **2015**, 56, 4131–4134.
- (12) Iranpoor, N.; Firouzadadi, H.; Pourali, A. *Synlett* **2004**, 347–349.
- (13) Chen, Q.; Huang, Y.; Wang, X.; Wu, J.; Yu, G. *Org. Biomol. Chem.* **2018**, 16, 1713–1719.
- (14) Zhang, X.; Cu, T.; Zhang, Y.; Gu, W.; Liu, P.; Sun, P. *Adv. Synth. Catal.* **2019**, 361, 2014–2019.
- (15) Liang, G.; Liu, M.; Chen, J.; Ding, J.; Gao, W.; Wu, H. *Chin. J. Chem.* **2012**, 30,

1611–1616.

- (16) Zhang, G.-Y.; Lv, S.-S.; Shoberu, A.; Zou, J.-P. *J. Org. Chem.* **2017**, *82*, 9801–9807.
- (17) Mo, Z.; Swaroop, T. R.; Tong, W.; Zhang, Y.; Tang, H.-T.; Pan, Y.-M.; Sun, H.; Chen, Z. *Green Chem.* **2018**, *20*, 4428–4432.
- (18) Fang, Y.; Rogge, T.; Ackermann, L.; Wang, S.-Y.; Ji, S.-J. *Nat. Commun.* **2018**, *9*, 2240.
- (19) Page, P. C. B.; Goodyear, R. L.; Horton, A. E.; Chan, Y.; Karim, R.; O’Connell, M. A.; Hamilton, C.; Slawin, A. M. Z.; Buckley, B. R.; Allin, S. M. *J. Org. Chem.* **2017**, *82*, 12209–12223.
- (20) Mampuy, P.; Zhu, Y.; Sergeev, S.; Ruijter, E.; Orru, R. V. A.; Van Doorslaer, S.; Maes, B. U. W. *Org. Lett.* **2023**, *25*, 2808–2811.
- (21) Cao, L.; Luo, S.; Jiang, K.; Hao, Z.; Wang, B.; Pang, C.; Wang, Z. *Org. Lett.* **2022**, *24*, 6794–6799.
- (22) Song, L.; Li, W.; Duan, W.; An, J.; Tang, S.; Li, L.; Yang, G. *Green Chem.* **2019**, *21*, 1432–1438.
- (23) Howard, J. L.; Schotten, C.; Alston, S. T.; Browne, D. L. *Chem. Commun.* **2016**, *52*, 8448–8451.
- (24) Talla, A.; Driessen, B.; Straathof, N. J. W.; Milroy, L. Brunsveld, L.; Hessel, V.; Noel, T. *Adv. Synth. Catal.* **2015**, *357*, 2180–2186.
- (25) Spiliopoulou, N.; Kokotos, C. G. *Green Chem.* **2021**, *23*, 546–551.
- (26) Abbasi, M.; Mohammadizadeh, M. R.; Saeedi, N. *New J. Chem.* **2016**, *40*, 89–92.
- (27) Demkowicz, S.; Rachon, J.; Witt, D. *Synthesis* **2008**, 2033–2038.
- (28) Wang, D.; Liang, X.; Xiong, M.; Zhu, H.; Zhou, Y.; Pan, Y. *Org. Biomol. Chem.* **2020**, *18*, 4447–4451.
- (29) Song, M.; Hu, Q.; Li, Z.; Sun, X.; Yang, K. *Chin. Chem. Lett.* **2022**, *33*, 4269–4272.
- (30) Zhang, G.; Fu, J.-G.; Zhao, Q.; Li, Meng.-Y.; Zhang, G. -S.; Feng, C.-G.; Lin, G.-Q. *Chem. Commun.*, **2020**, *56*, 4688–4691.

## 15. Copies of NMR Spectra for Compounds

<sup>1</sup>H NMR spectrum for compound **2a** (CDCl<sub>3</sub>, 400 MHz)

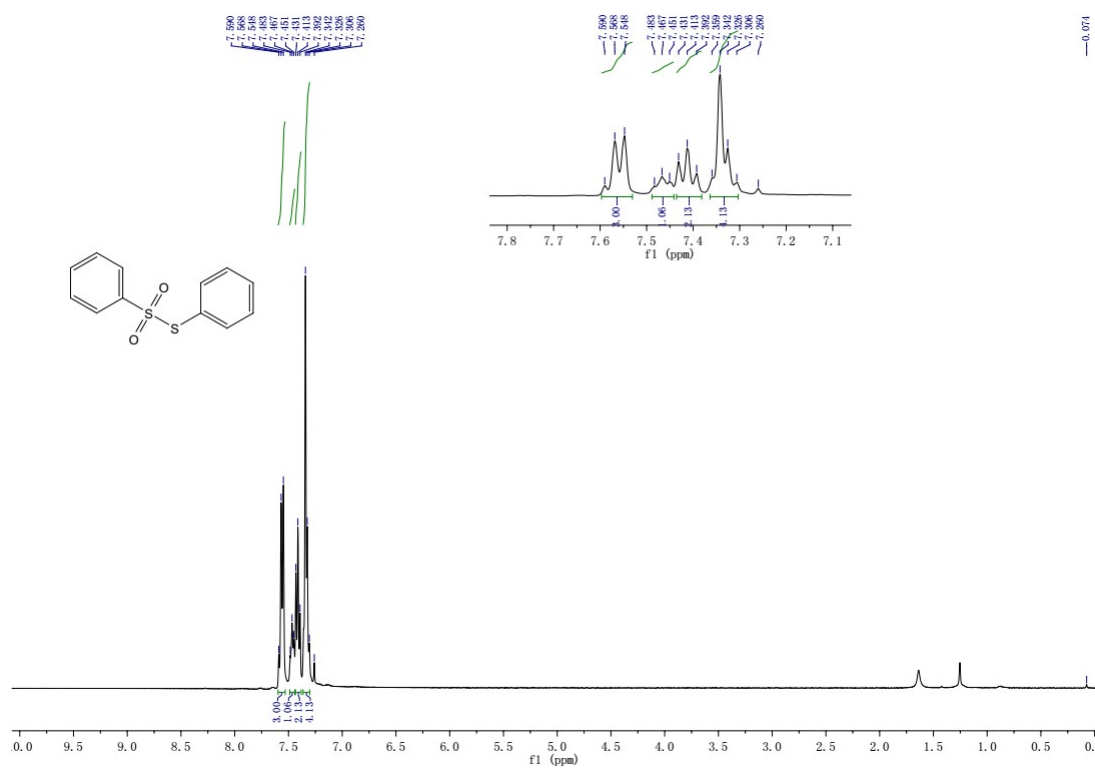

<sup>13</sup>C NMR spectrum for compound **2a** (CDCl<sub>3</sub>, 101 MHz)

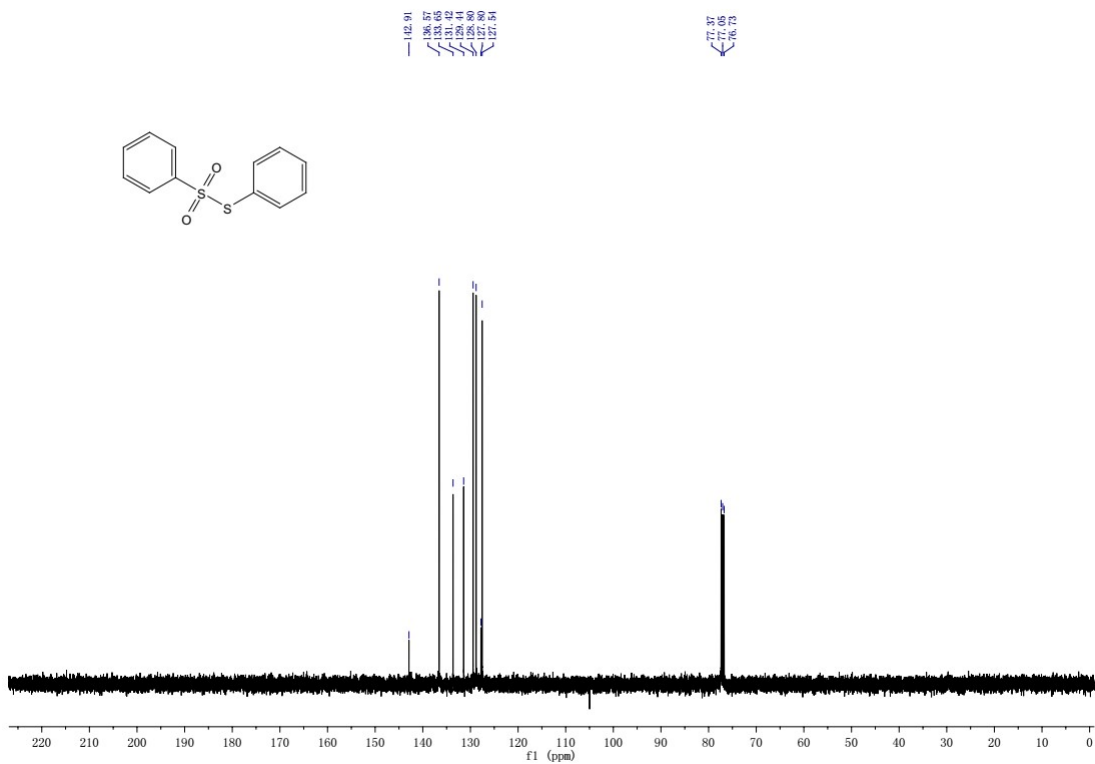

<sup>1</sup>H NMR spectrum for compound **2b** (CDCl<sub>3</sub>, 400 MHz)

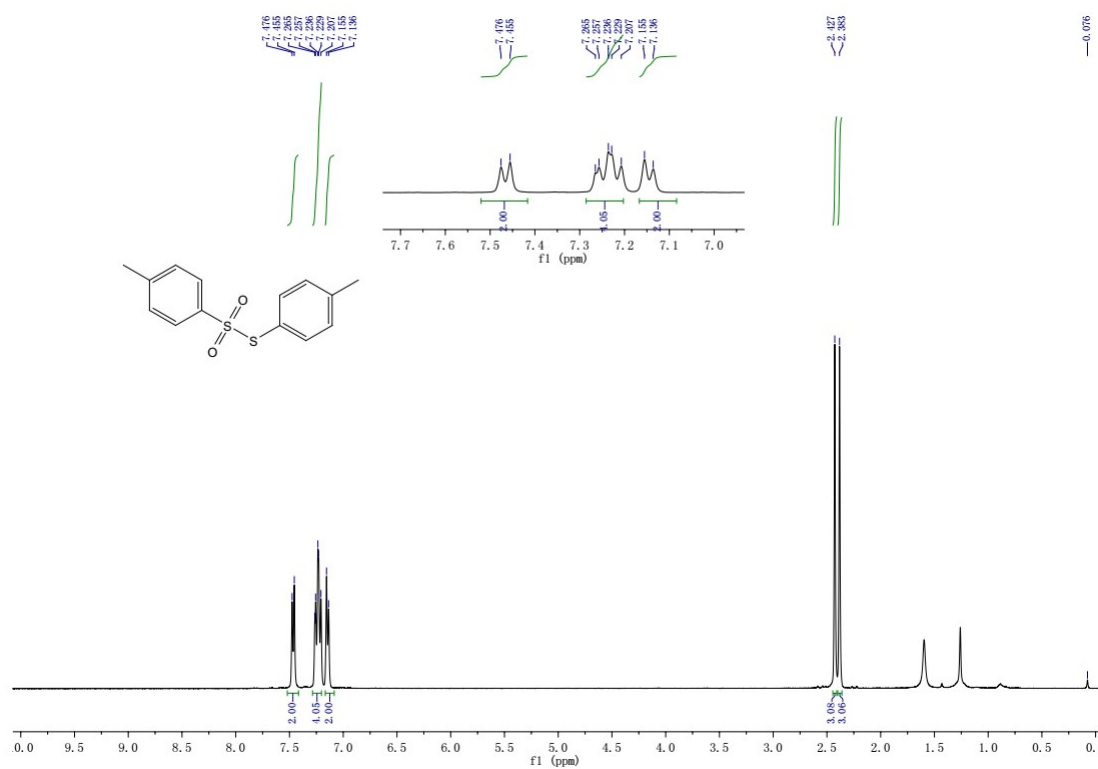

**<sup>13</sup>C NMR spectrum for compound 2b (CDCl<sub>3</sub>, 101 MHz)**

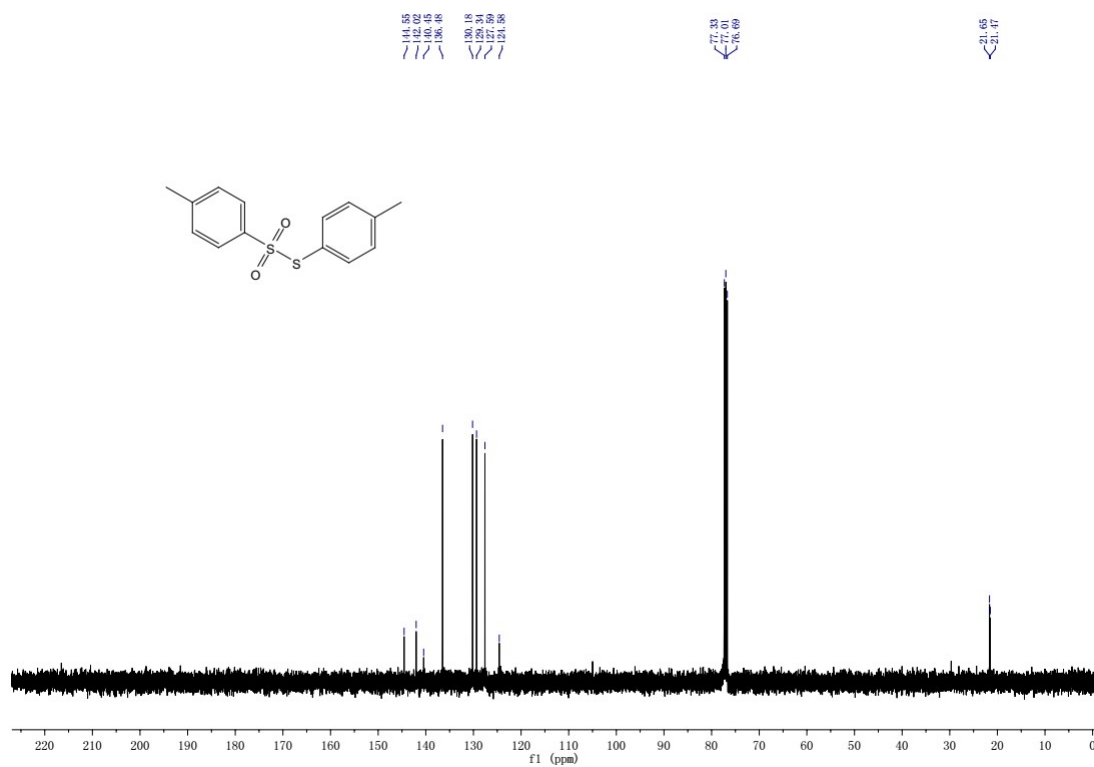

**<sup>1</sup>H NMR spectrum for compound 2c (CDCl<sub>3</sub>, 400 MHz)**

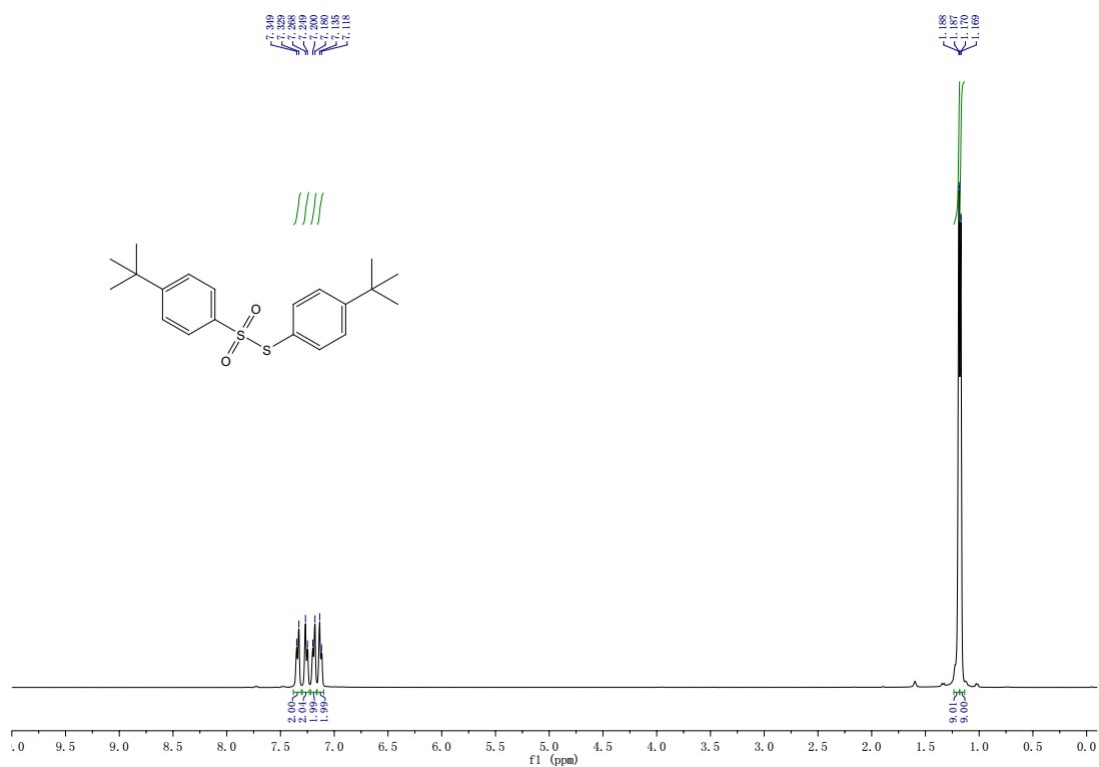

<sup>13</sup>C NMR spectrum for compound **2c** (CDCl<sub>3</sub>, 101 MHz)

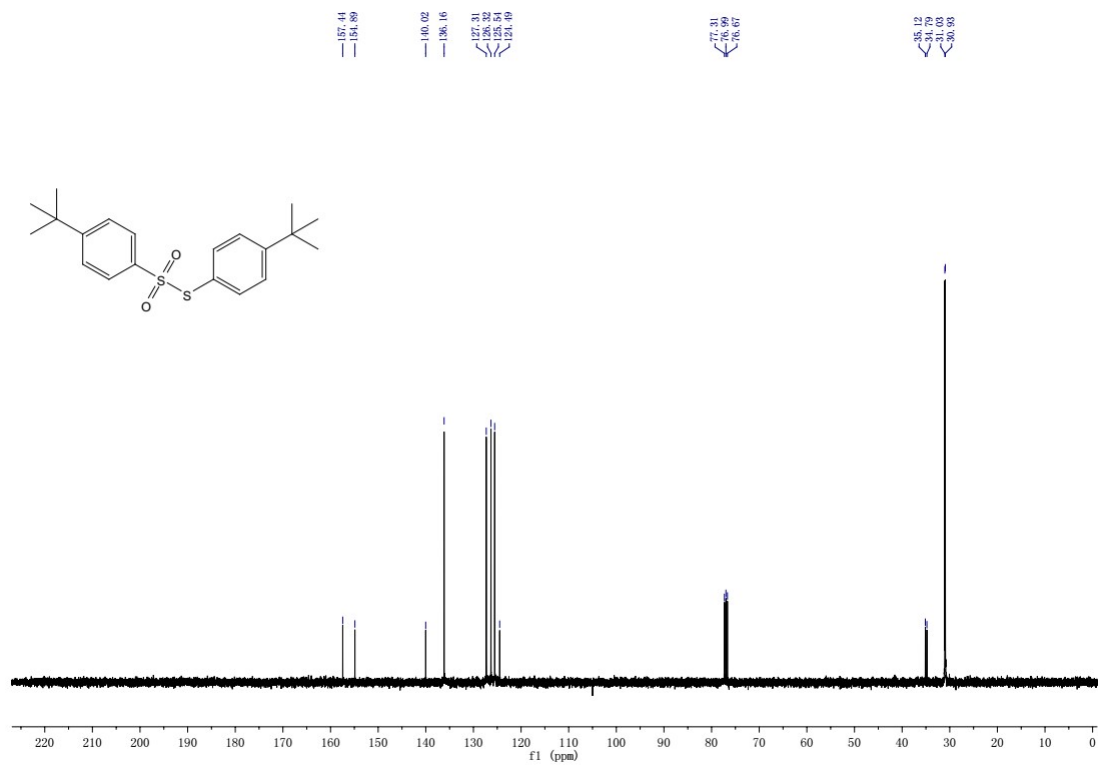

<sup>1</sup>H NMR spectrum for compound **2d** (CDCl<sub>3</sub>, 400 MHz)

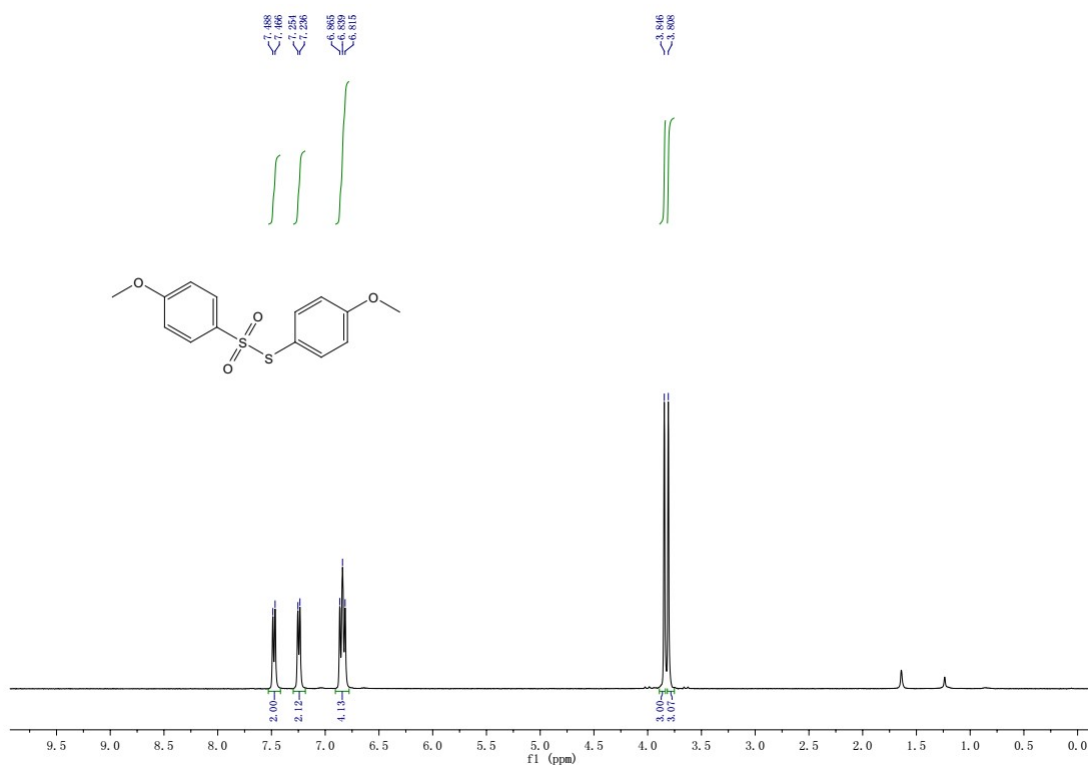

$^{13}\text{C}$  NMR spectrum for compound **2d** ( $\text{CDCl}_3$ , 101 MHz)

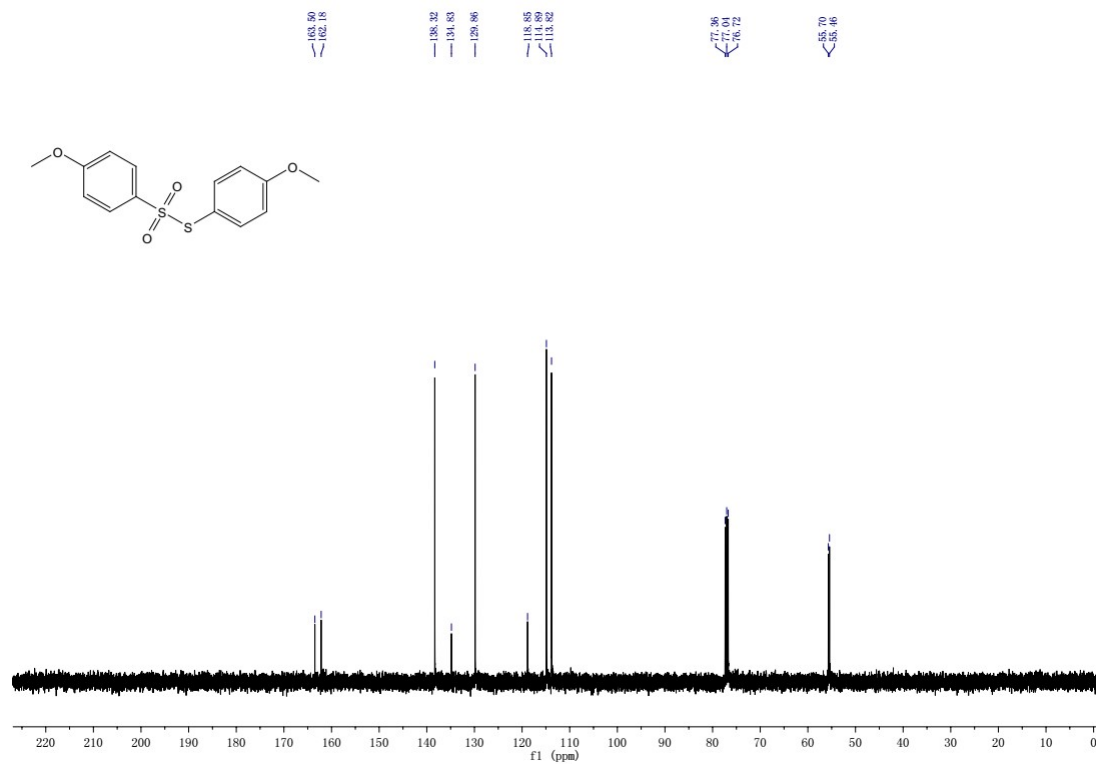

$^1\text{H}$  NMR spectrum for compound **2e** ( $\text{CDCl}_3$ , 400 MHz)

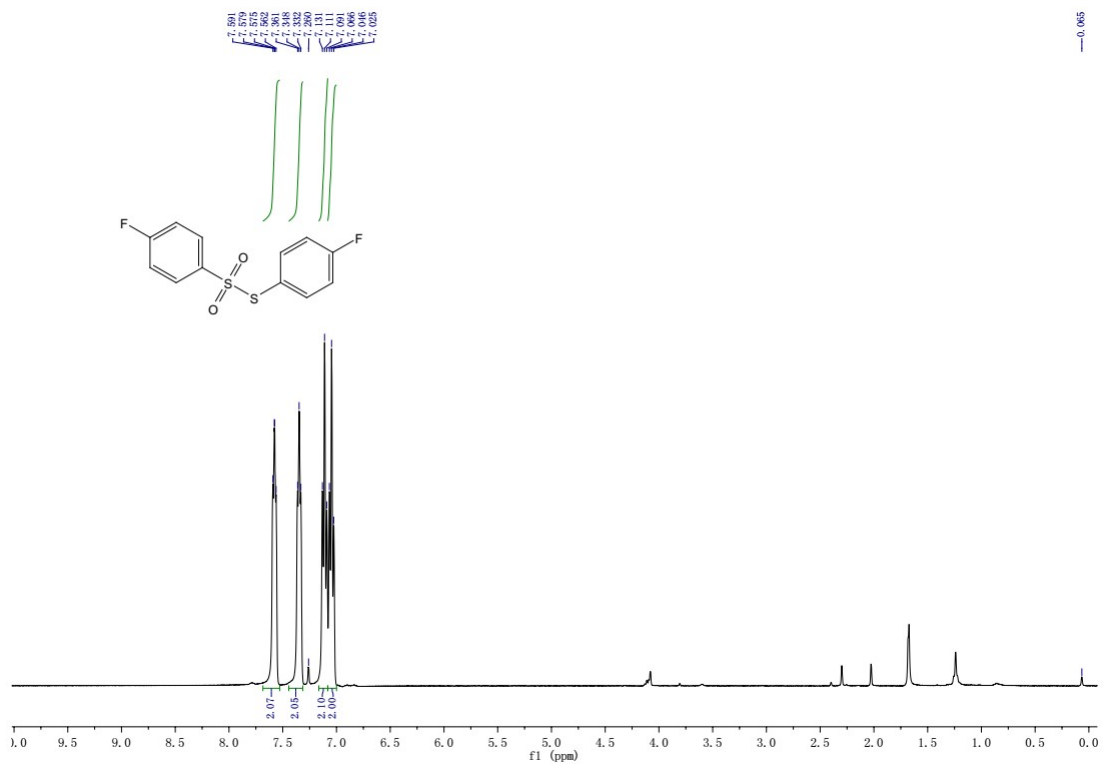

—0.065

<sup>13</sup>C NMR spectrum for compound **2e** (CDCl<sub>3</sub>, 101 MHz)

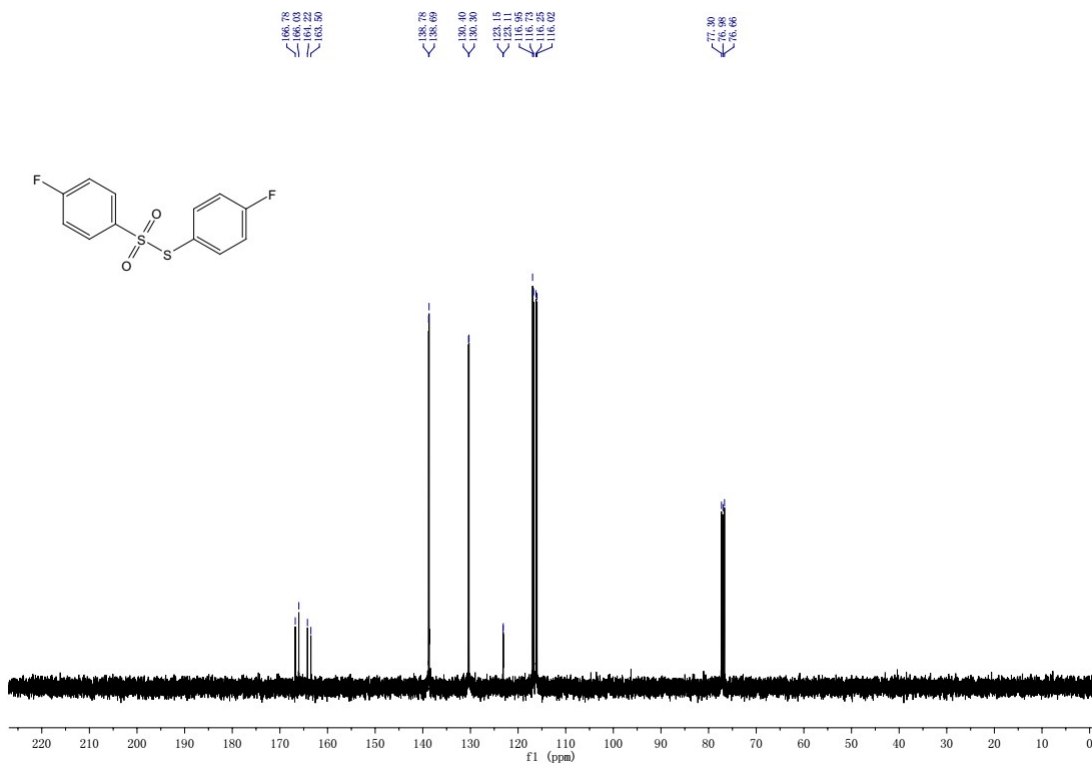

<sup>19</sup>F NMR spectrum for compound **2e** (CDCl<sub>3</sub>, 376 MHz)

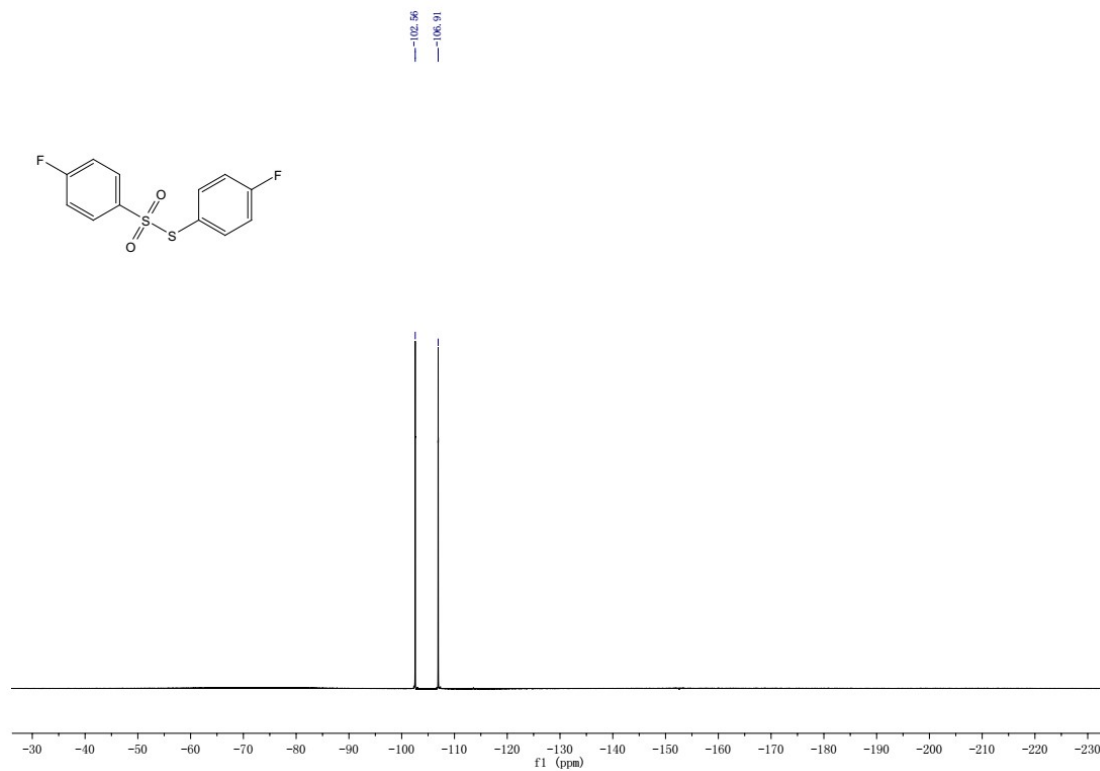

$^1\text{H}$  NMR spectrum for compound **2f** ( $\text{CDCl}_3$ , 400 MHz)

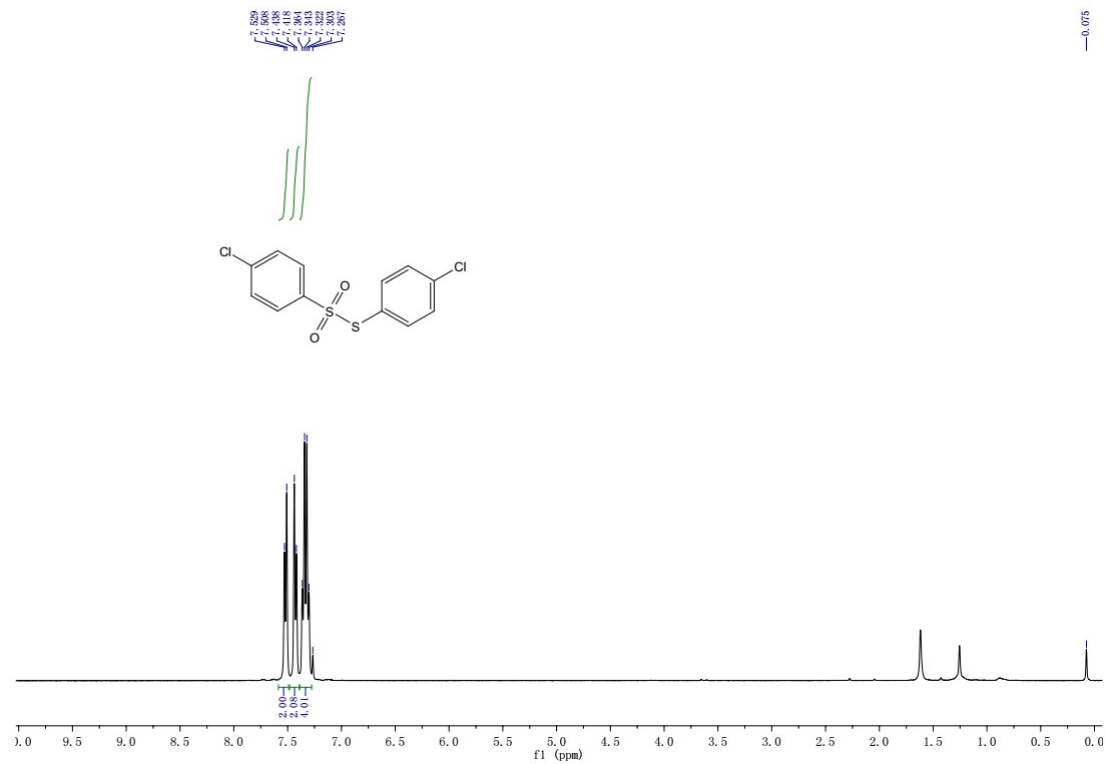

$^{13}\text{C}$  NMR spectrum for compound **2f** ( $\text{CDCl}_3$ , 101 MHz)



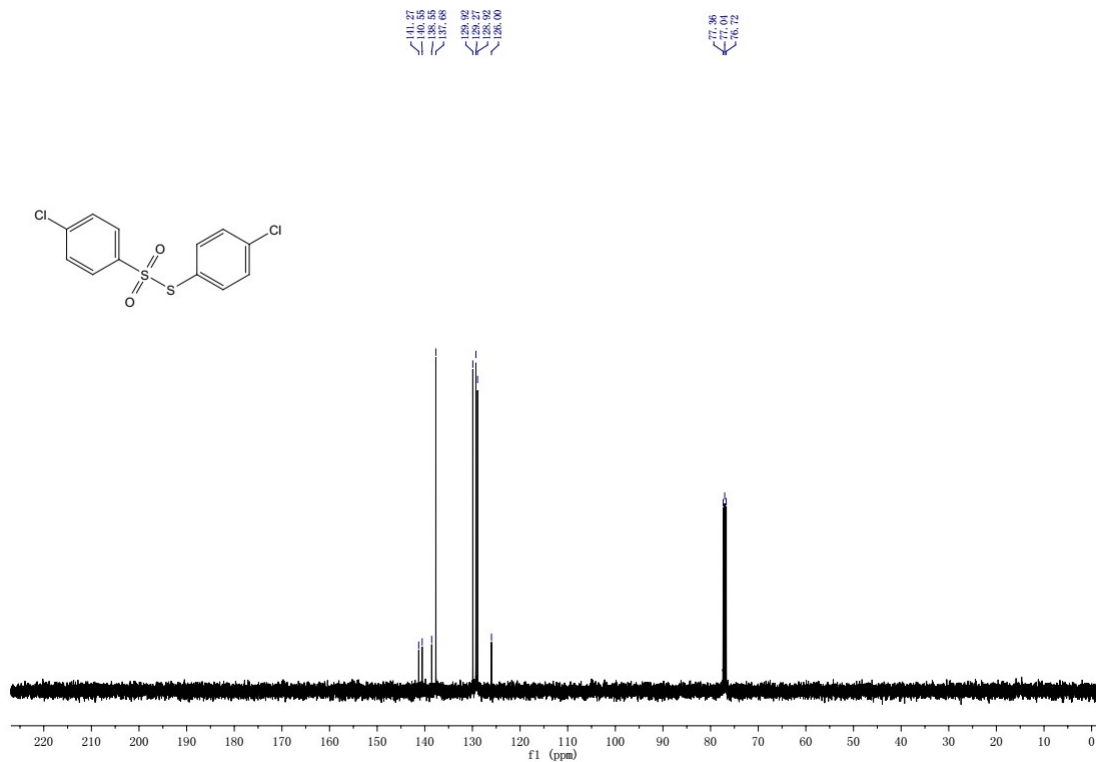

<sup>1</sup>H NMR spectrum for compound **2g** (CDCl<sub>3</sub>, 400 MHz)

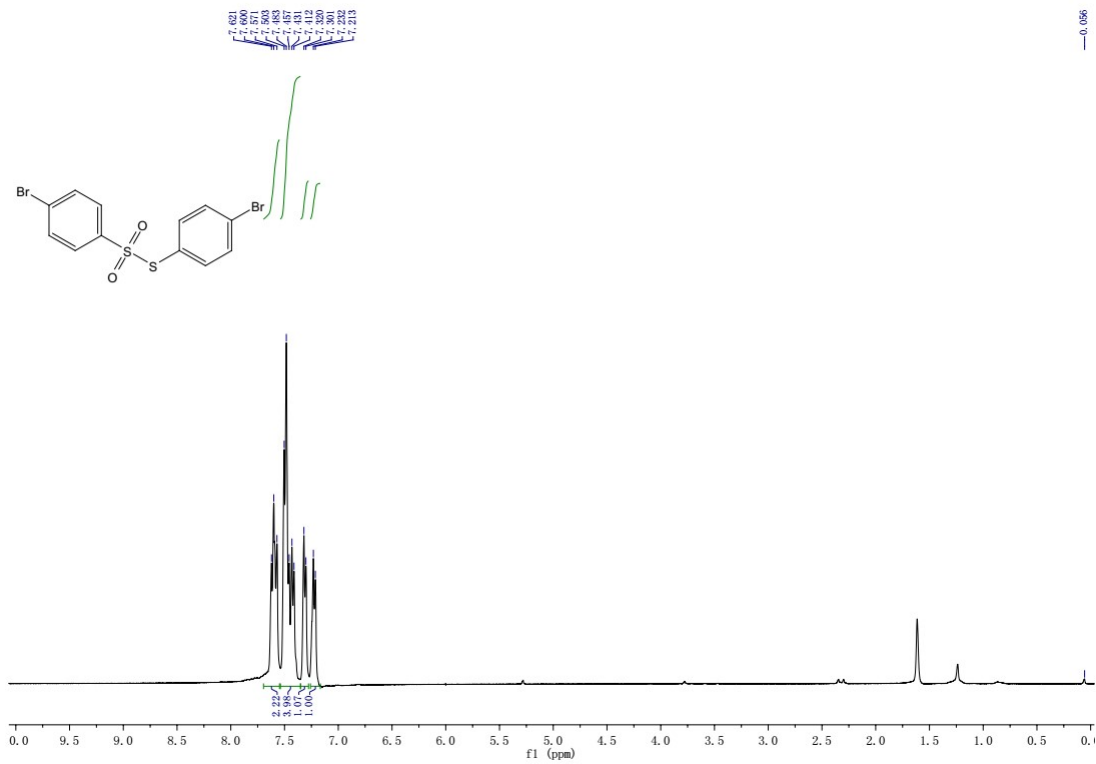

<sup>13</sup>C NMR spectrum for compound **2g** (CDCl<sub>3</sub>, 101 MHz)

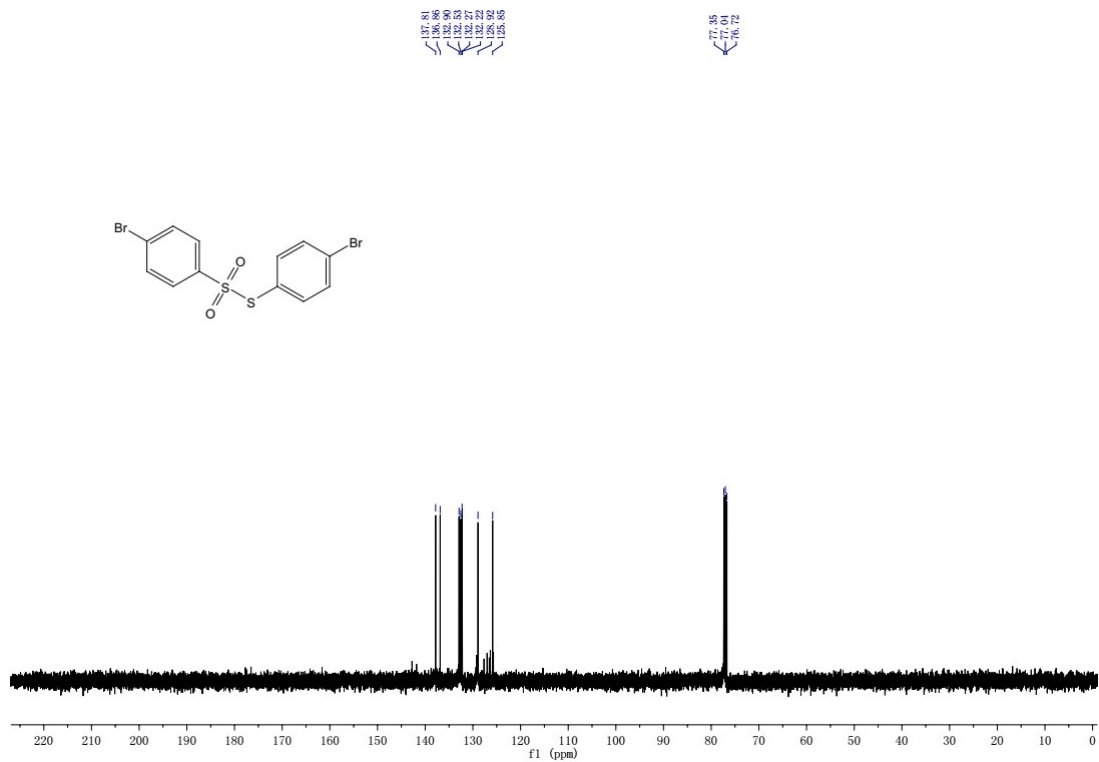

<sup>1</sup>H NMR spectrum for compound **2h** (CDCl<sub>3</sub>, 400 MHz)

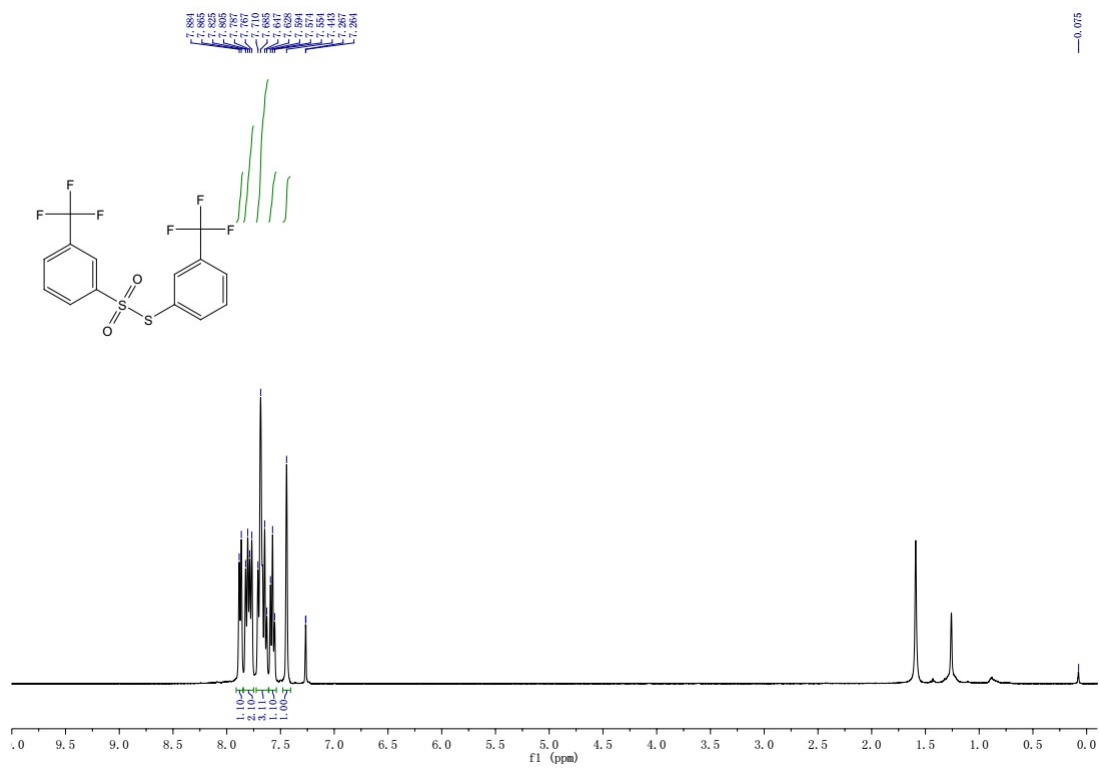

<sup>13</sup>C NMR spectrum for compound **2h** (CDCl<sub>3</sub>, 101 MHz)

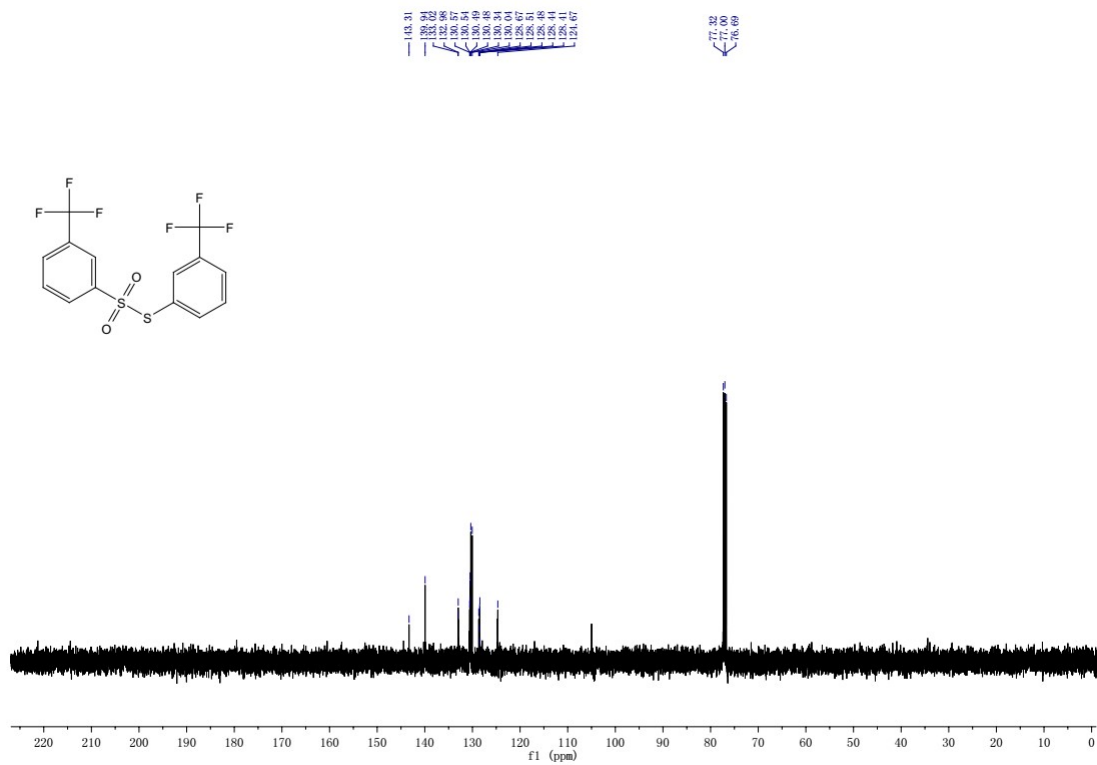

<sup>19</sup>F NMR spectrum for compound **2h** (CDCl<sub>3</sub>, 376 MHz)

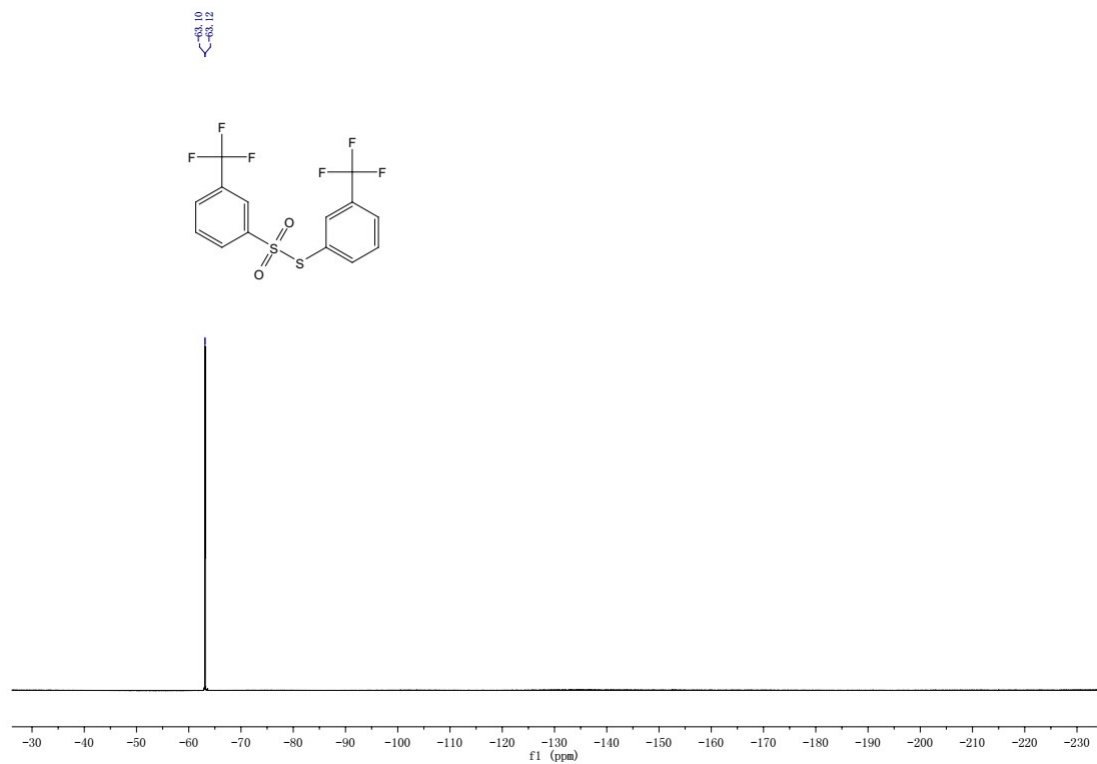

<sup>1</sup>H NMR spectrum for compound **2i** (CDCl<sub>3</sub>, 400 MHz)

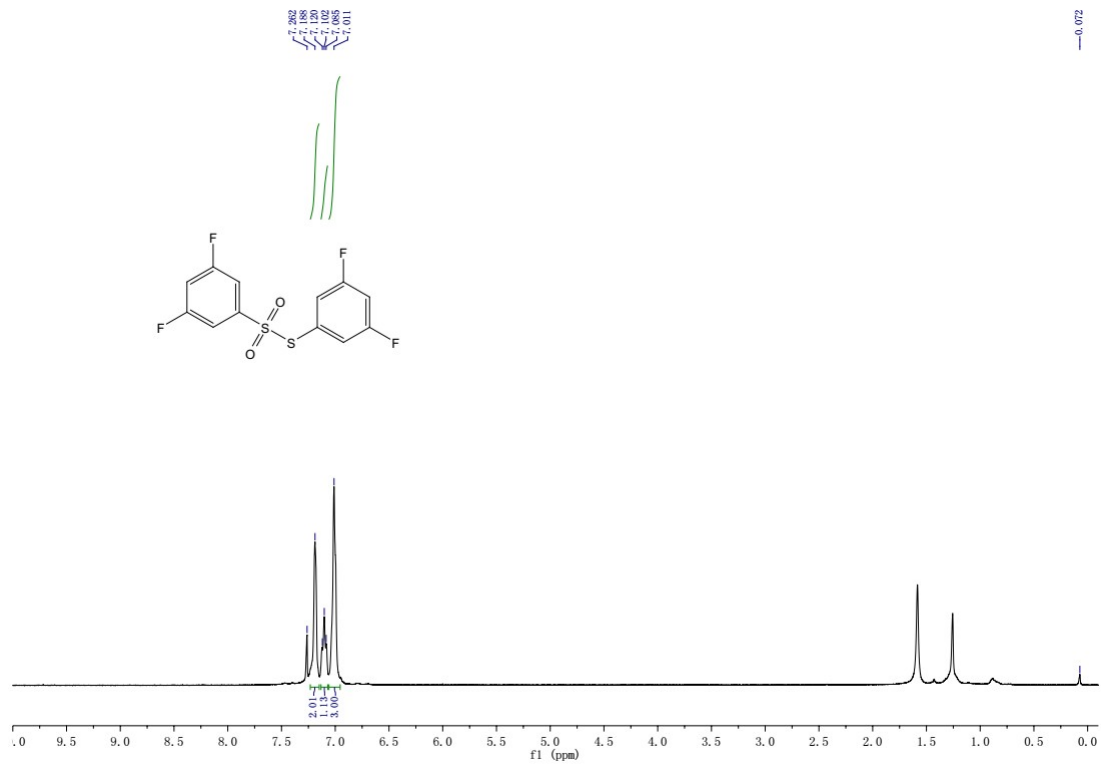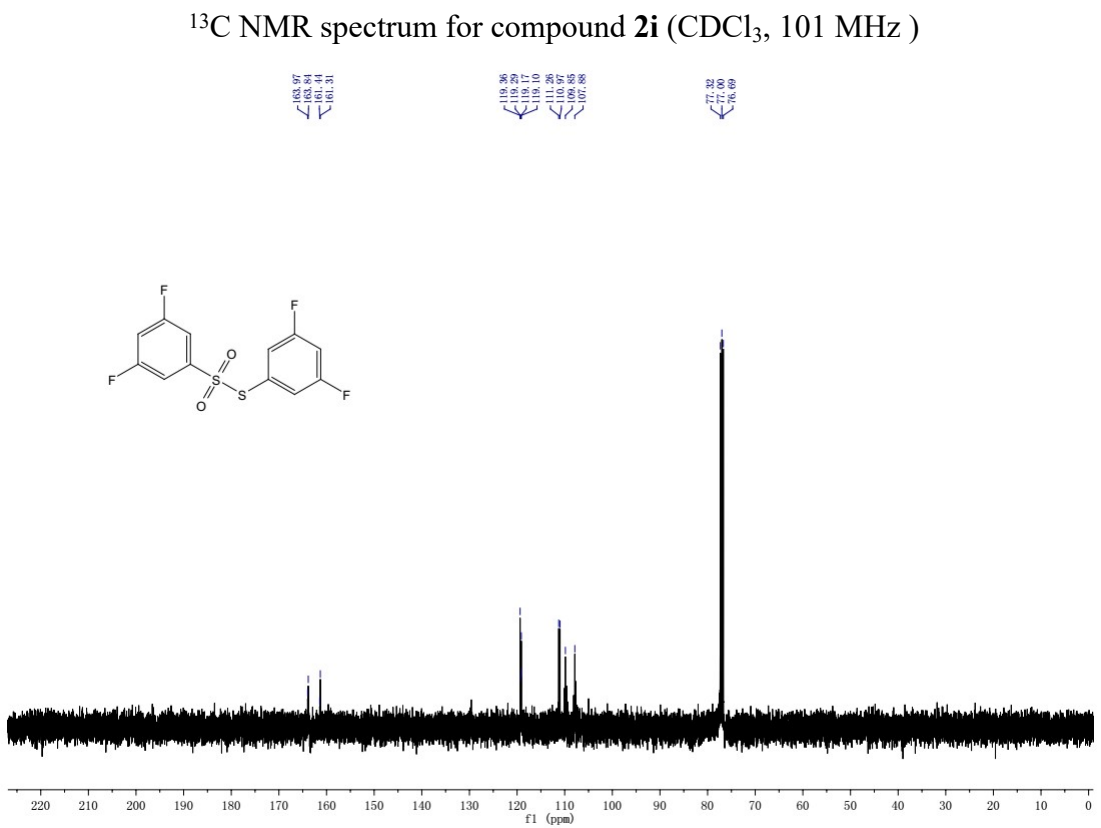

<sup>19</sup>F NMR spectrum for compound **2i** (CDCl<sub>3</sub>, 376 MHz)

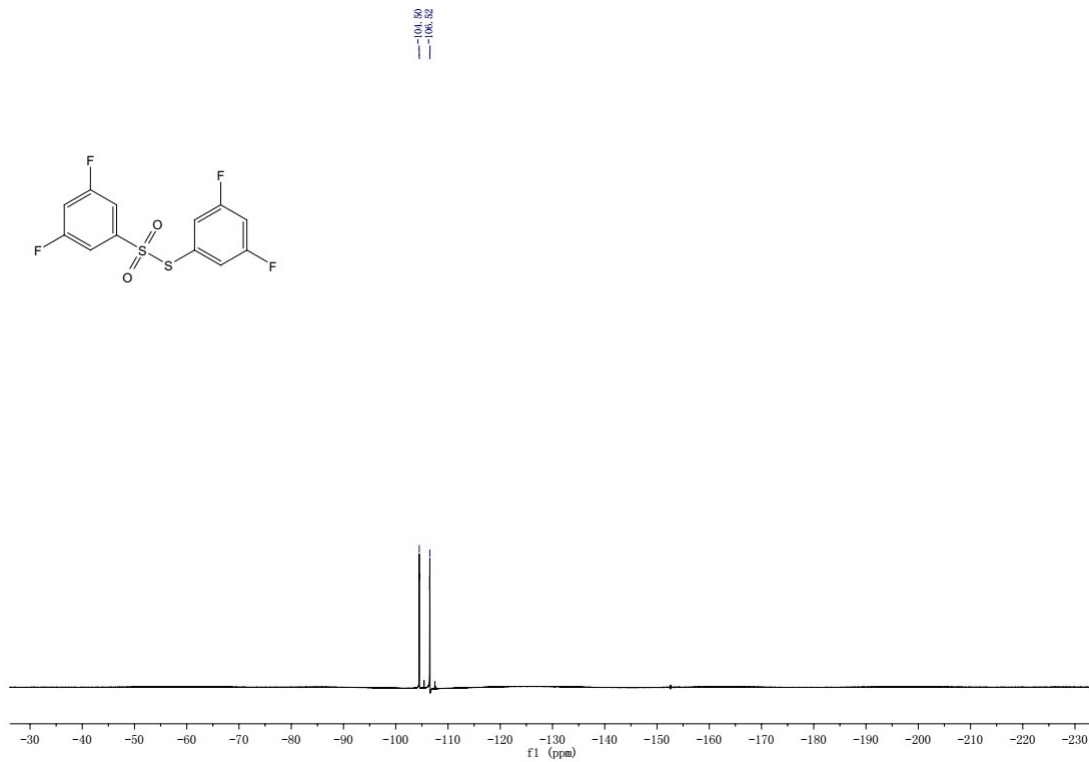

$^1\text{H}$  NMR spectrum for compound **2j** ( $\text{CDCl}_3$ , 400 MHz)

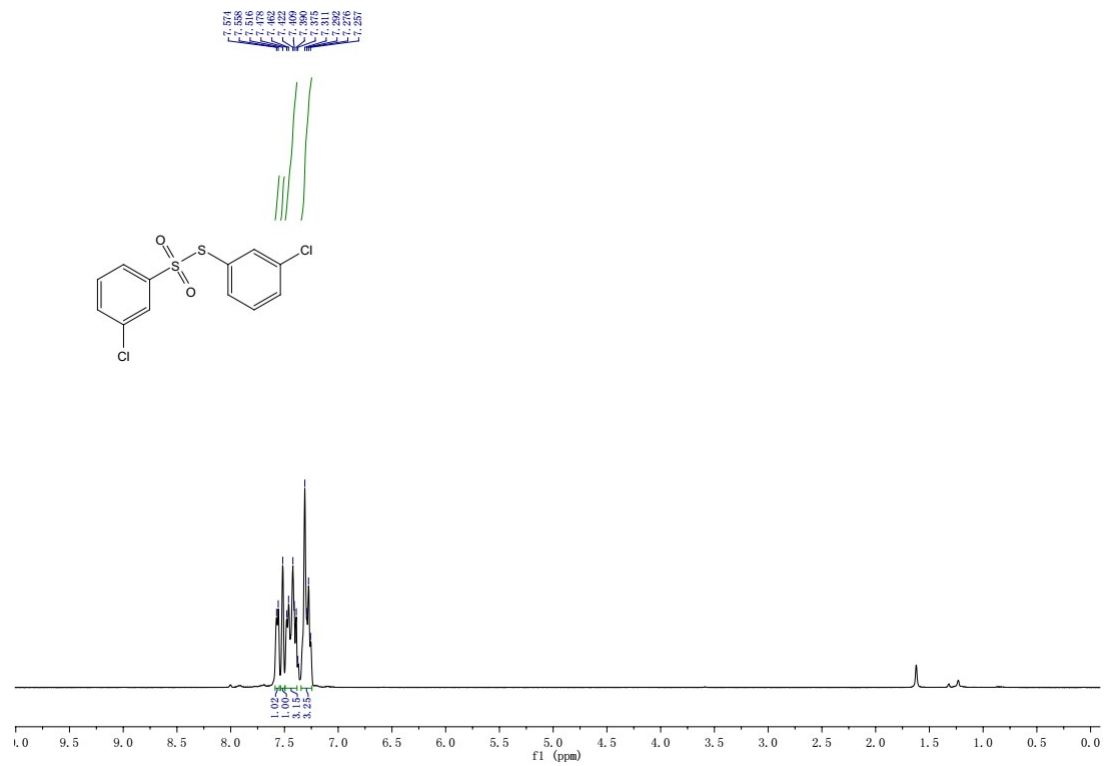

$^{13}\text{C}$  NMR spectrum for compound **2j** ( $\text{CDCl}_3$ , 101 MHz)

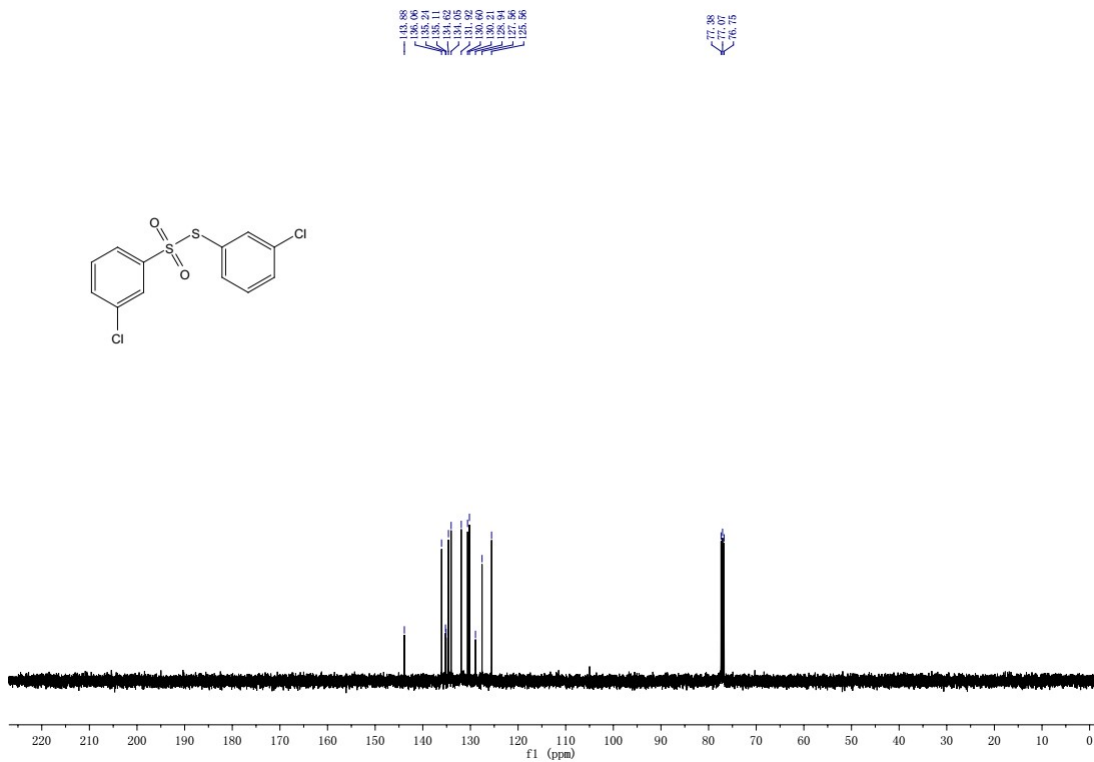

<sup>1</sup>H NMR spectrum for compound **2k** (CDCl<sub>3</sub>, 400 MHz)

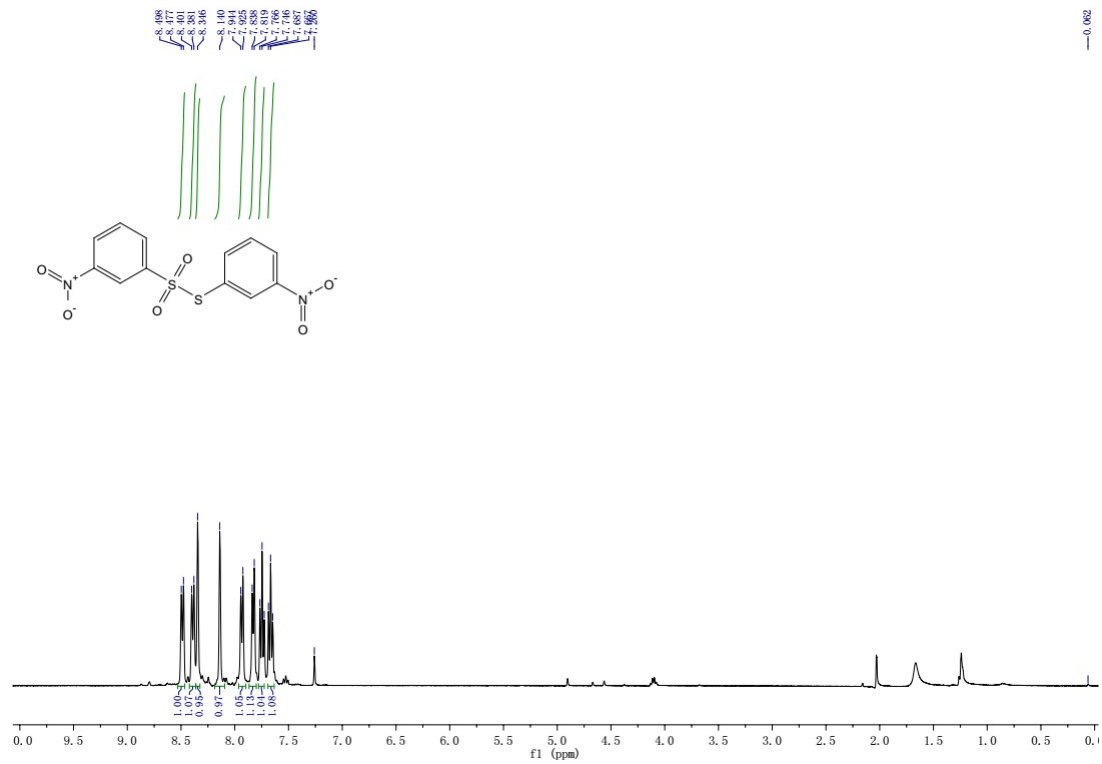

<sup>13</sup>C NMR spectrum for compound **2k** (CDCl<sub>3</sub>, 101 MHz)

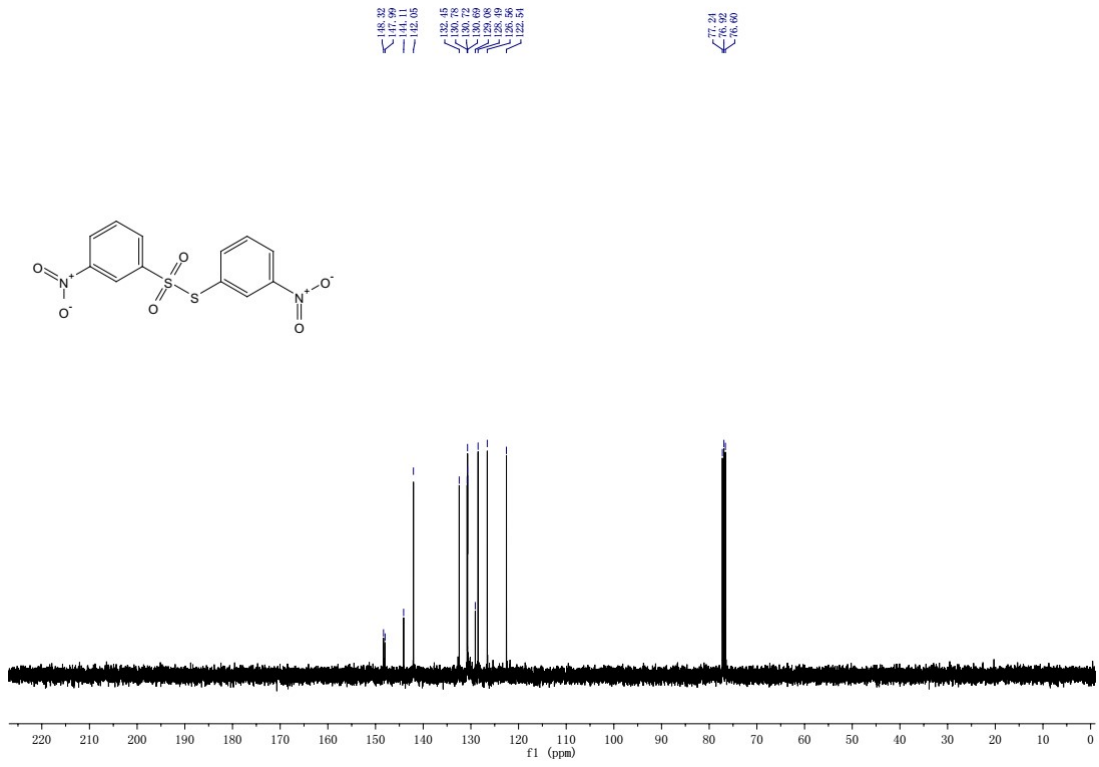

<sup>1</sup>H NMR spectrum for compound **2I** (CDCl<sub>3</sub>, 400 MHz)

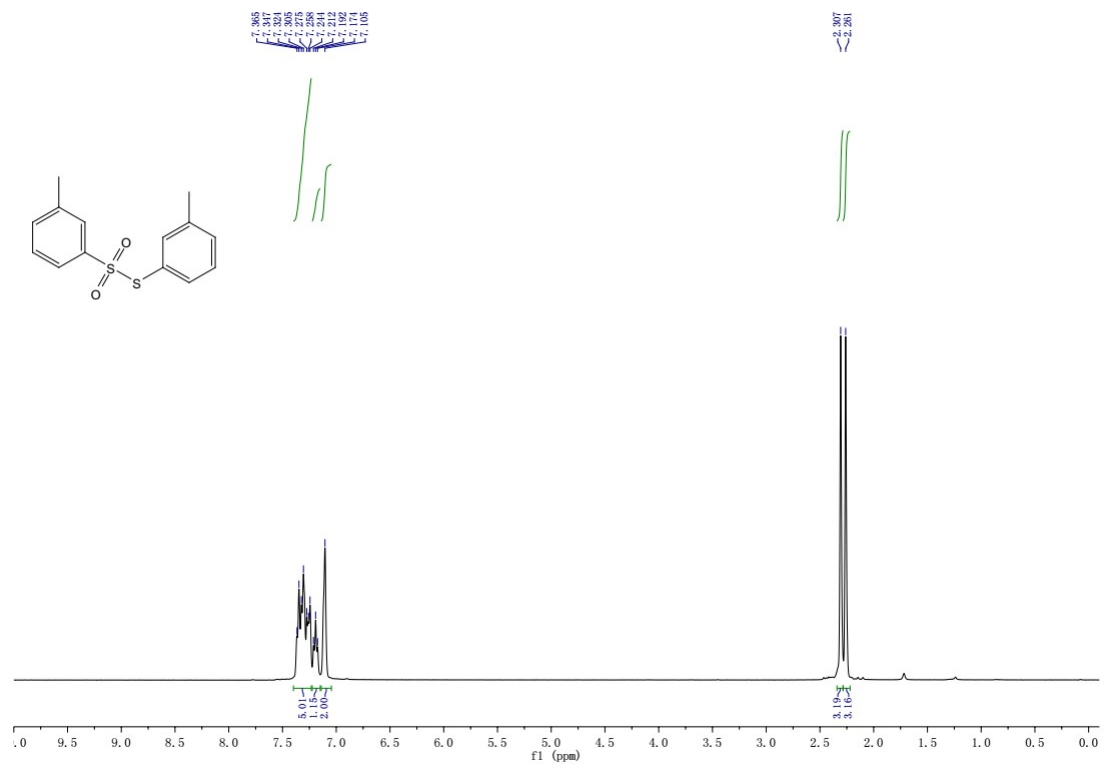

<sup>13</sup>C NMR spectrum for compound **2I** (CDCl<sub>3</sub>, 101 MHz)

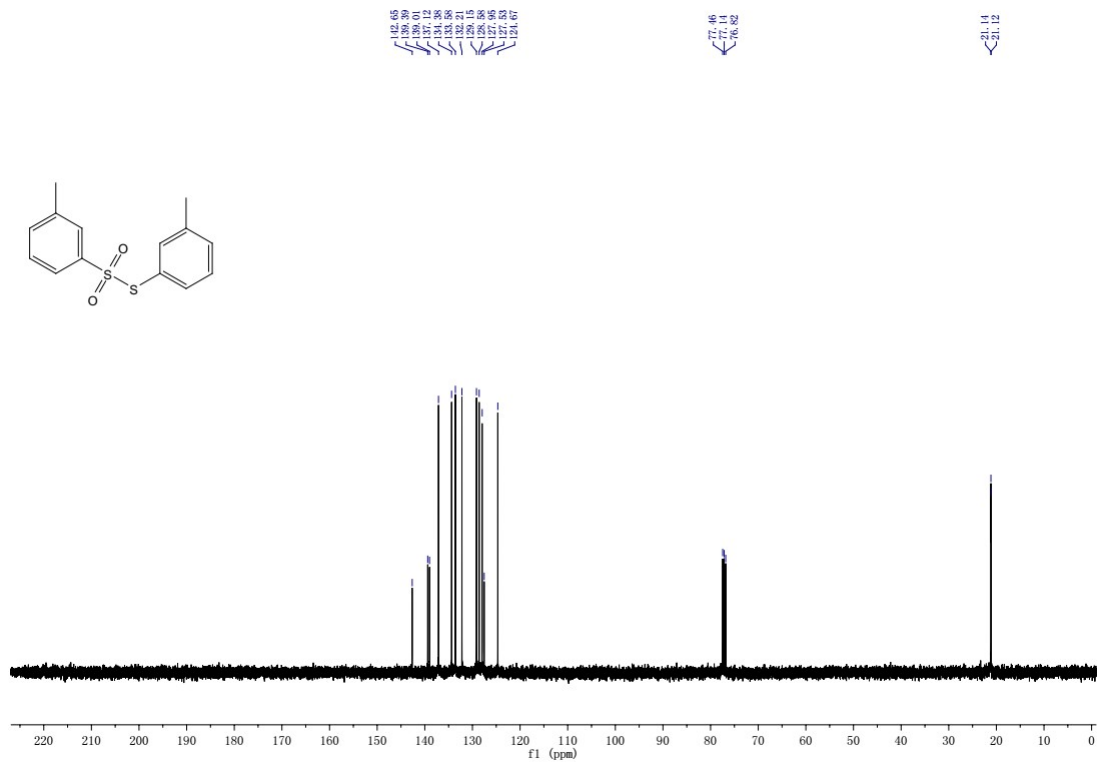

<sup>1</sup>H NMR spectrum for compound **2m** (CDCl<sub>3</sub>, 400 MHz)

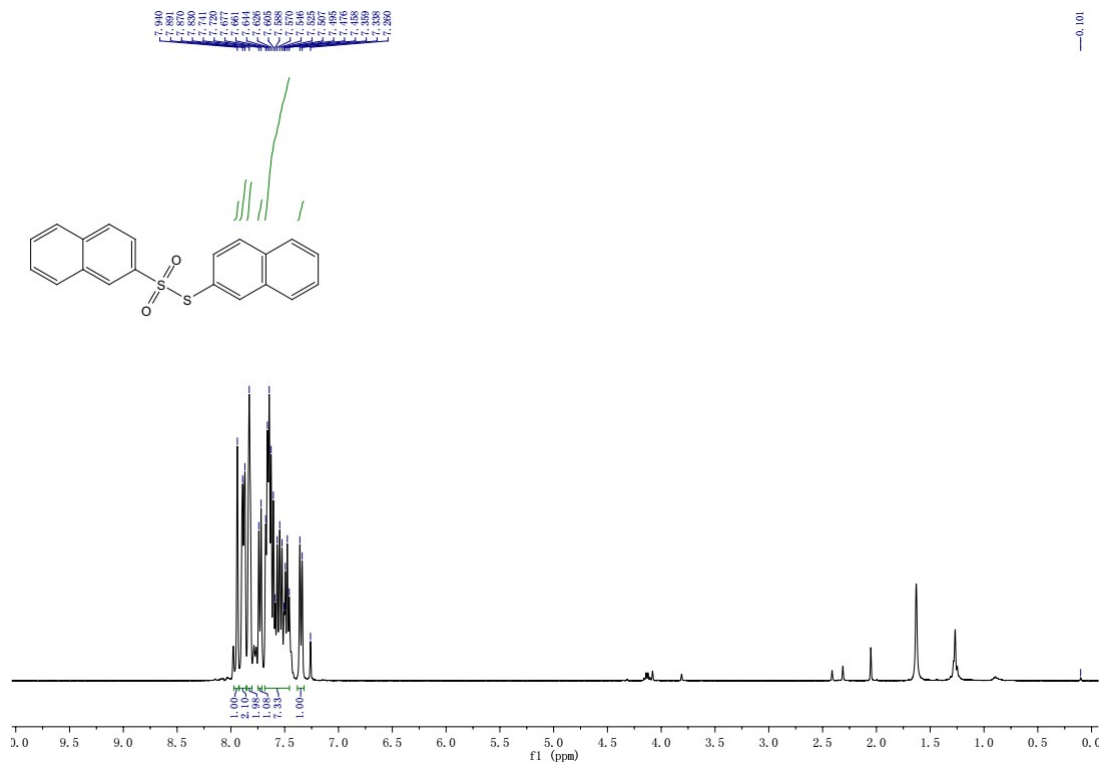

<sup>13</sup>C NMR spectrum for compound **2m** (CDCl<sub>3</sub>, 101 MHz)



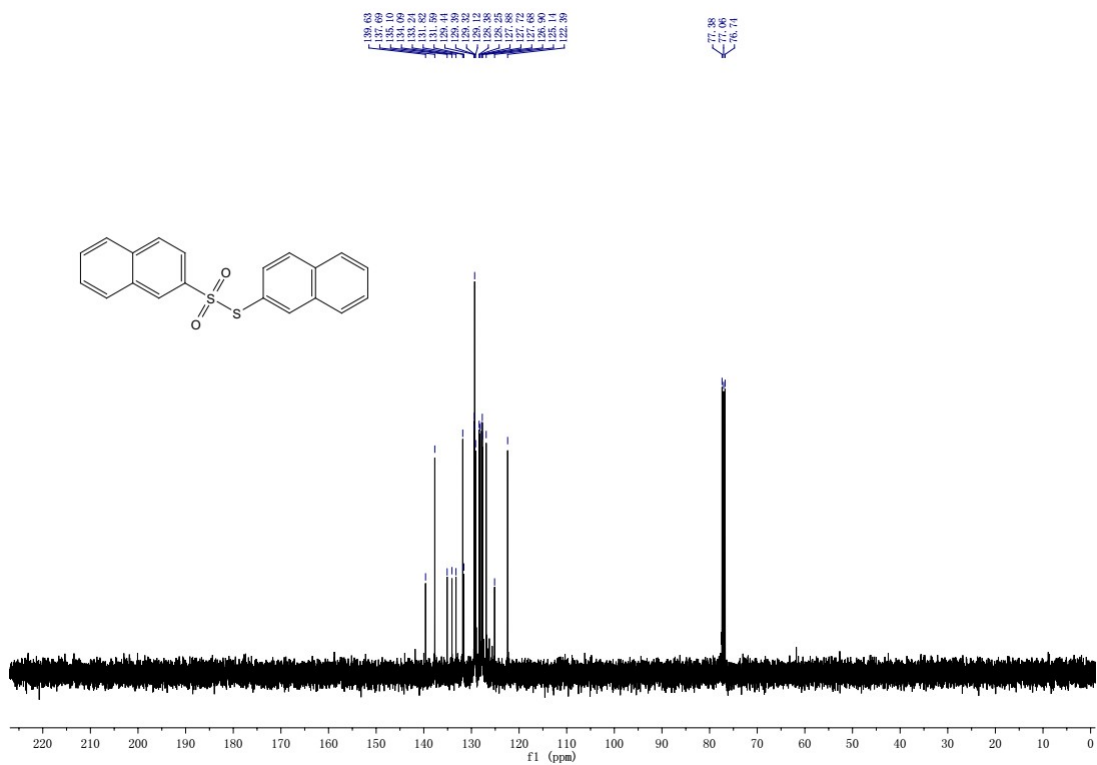

<sup>1</sup>H NMR spectrum for compound **2n** (CDCl<sub>3</sub>, 400 MHz)

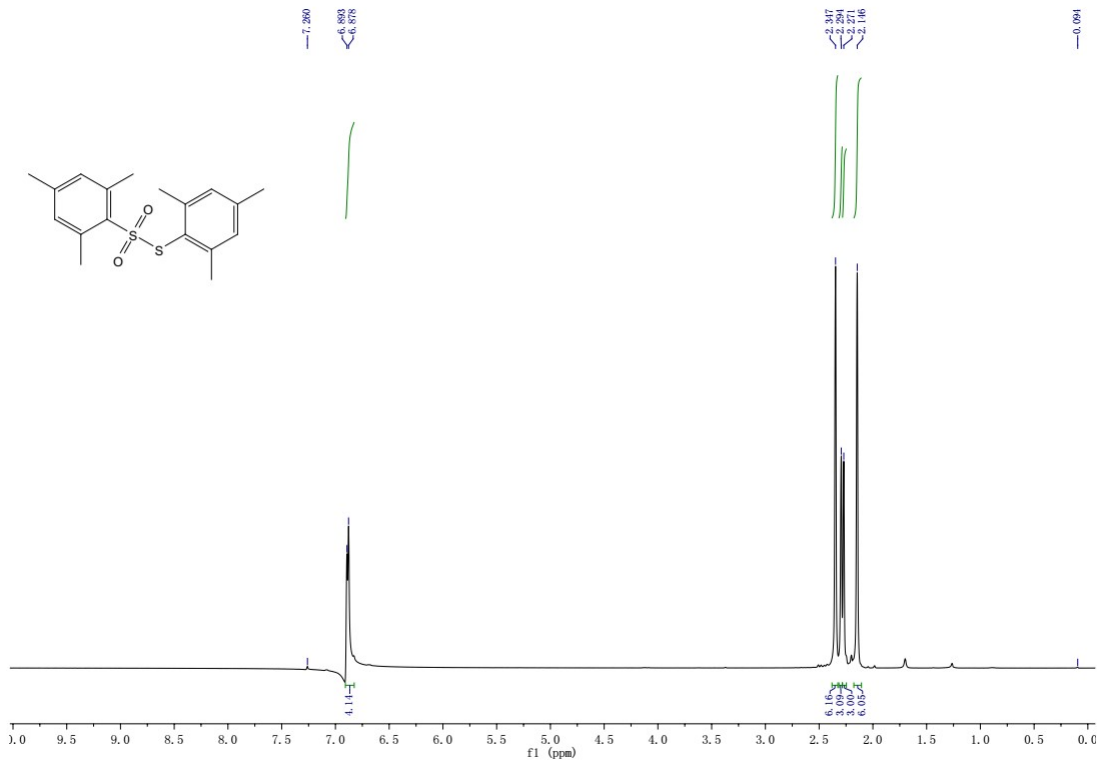

<sup>13</sup>C NMR spectrum for compound **2n** (CDCl<sub>3</sub>, 101 MHz)

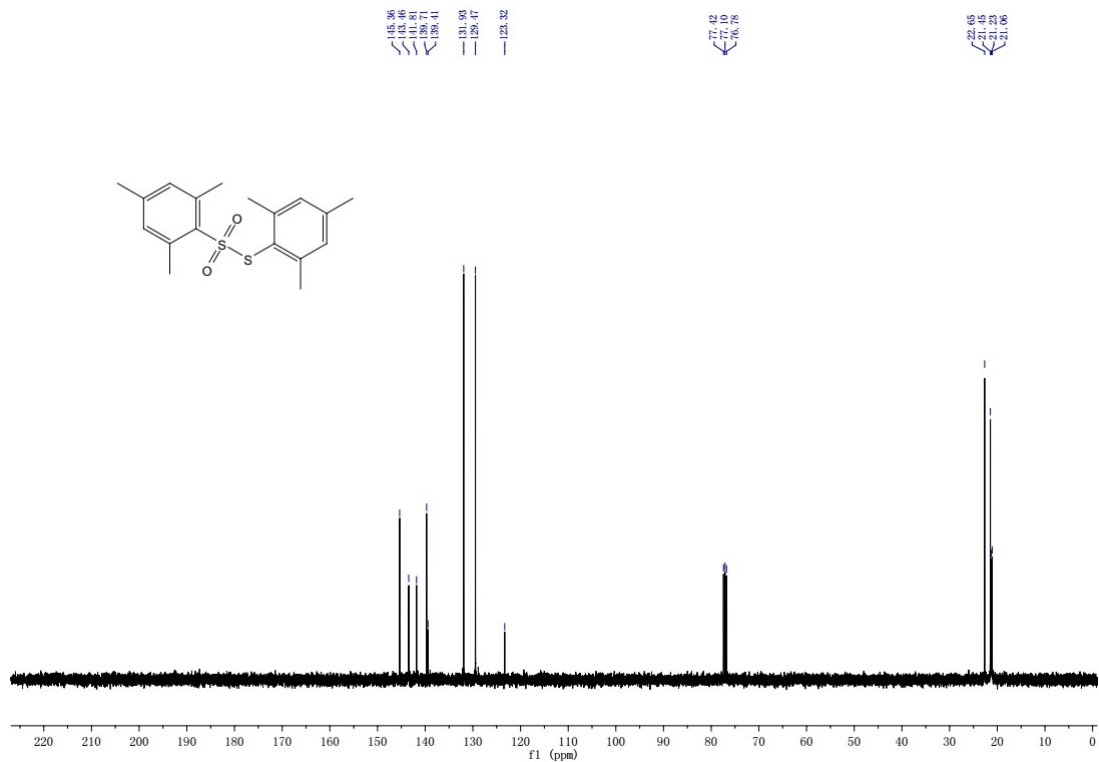

<sup>1</sup>H NMR spectrum for compound **2o** (CDCl<sub>3</sub>, 400 MHz)

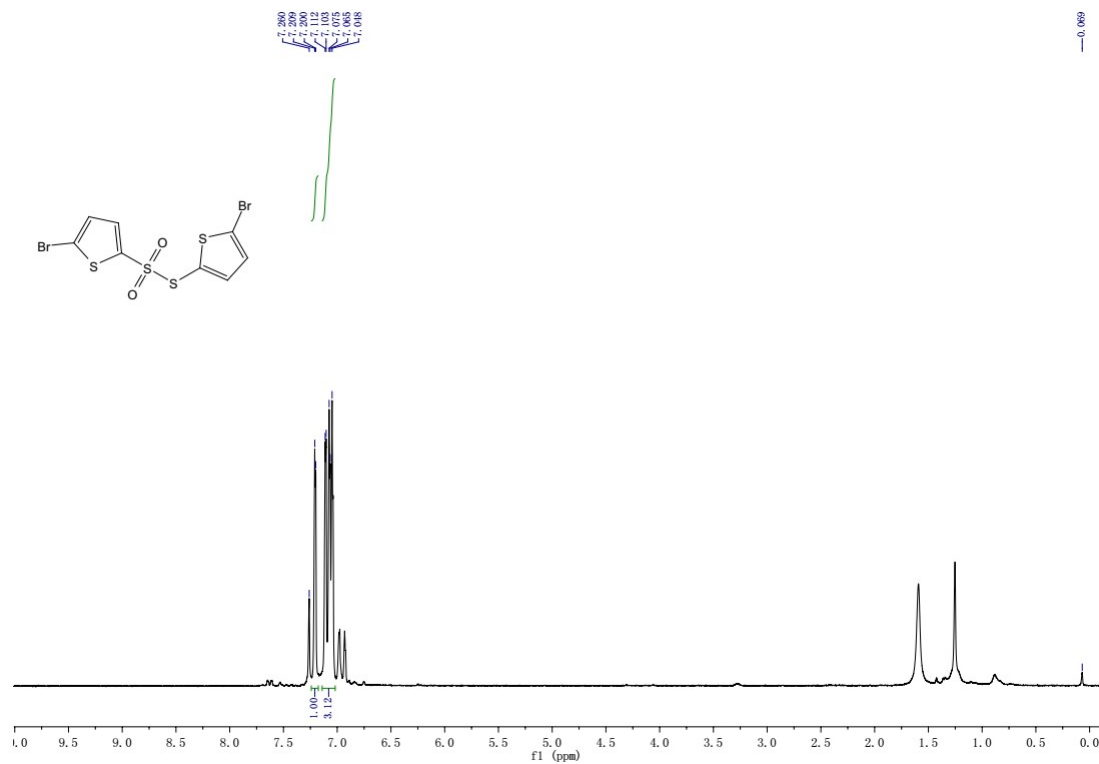

<sup>13</sup>C NMR spectrum for compound **2o** (CDCl<sub>3</sub>, 101 MHz)

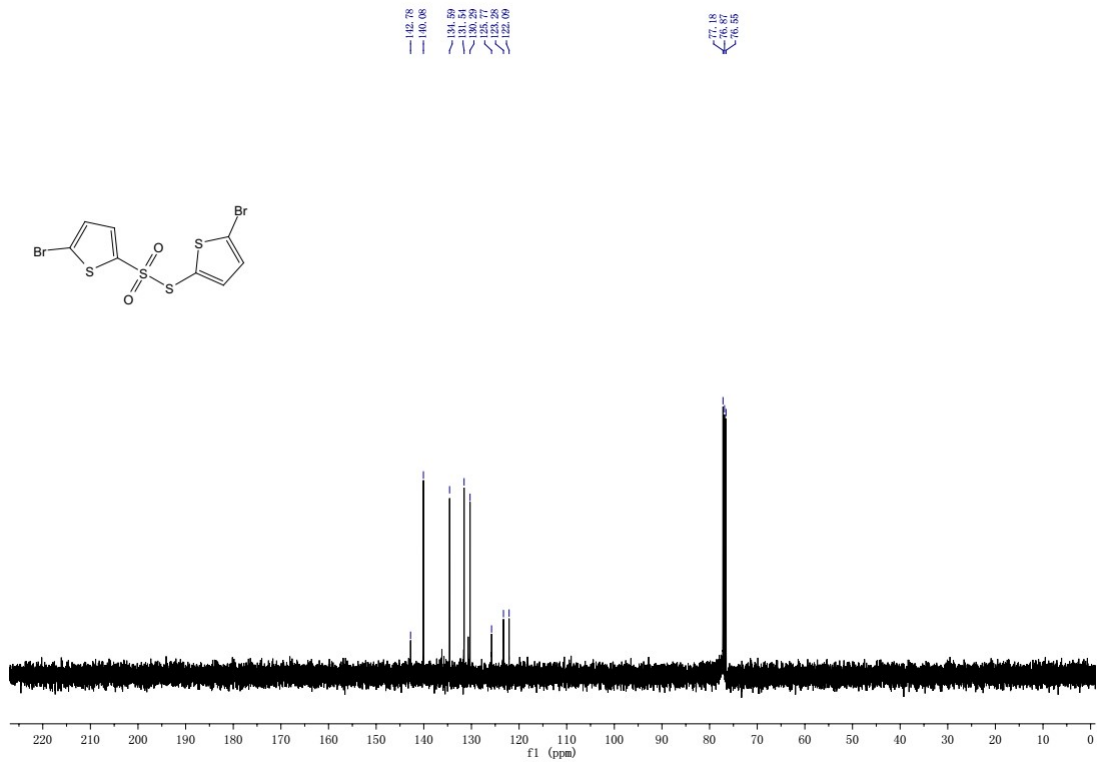

$^1\text{H}$  NMR spectrum for compound **2p** ( $\text{CDCl}_3$ , 400 MHz)

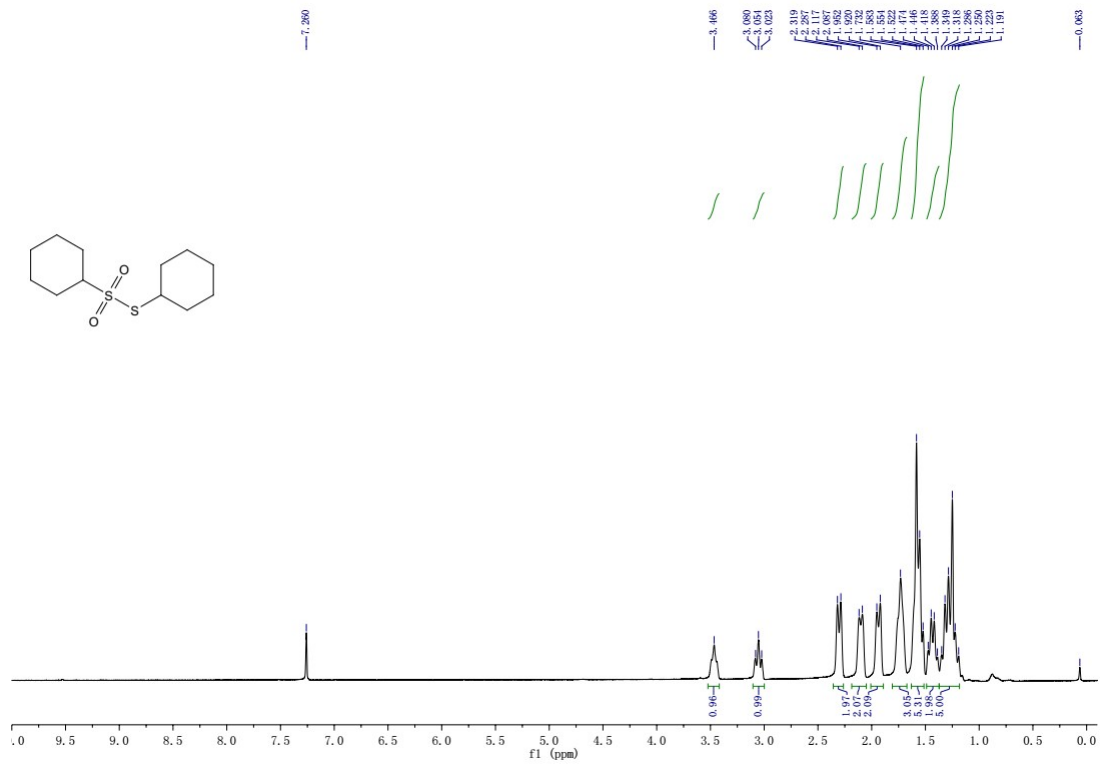

$^{13}\text{C}$  NMR spectrum for compound **2p** ( $\text{CDCl}_3$ , 101 MHz)

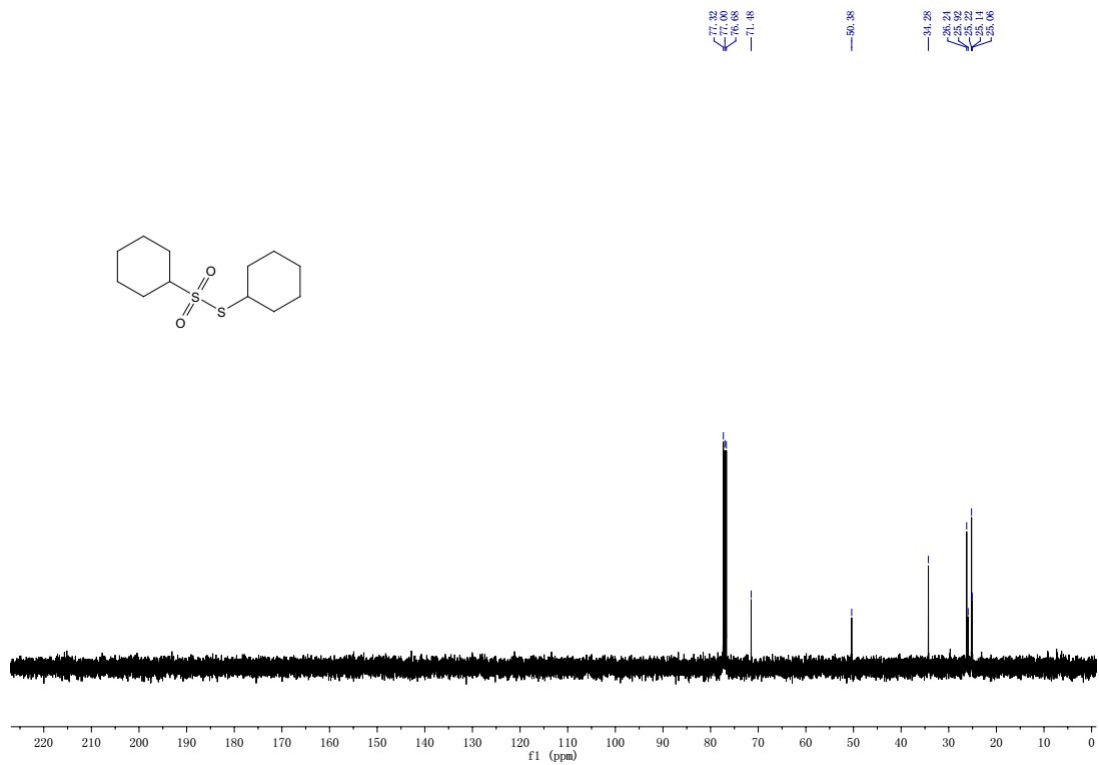

<sup>1</sup>H NMR spectrum for compound **2q** (CDCl<sub>3</sub>, 400 MHz)

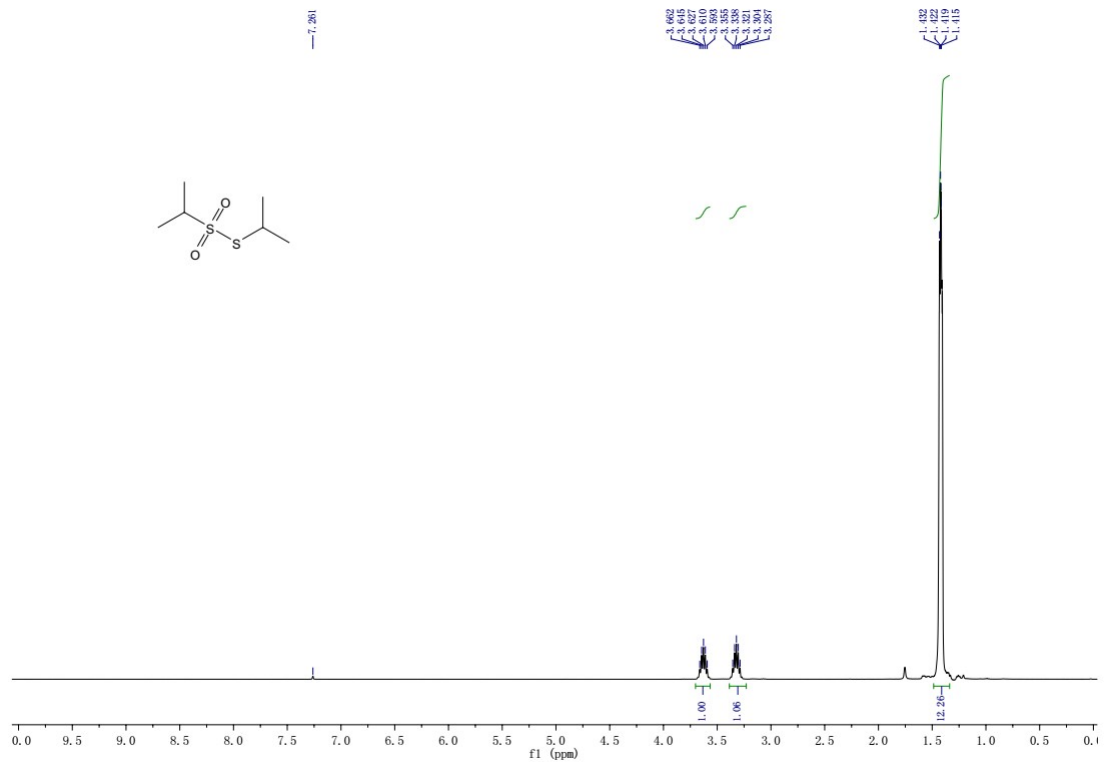

<sup>13</sup>C NMR spectrum for compound **2q** (CDCl<sub>3</sub>, 101 MHz)

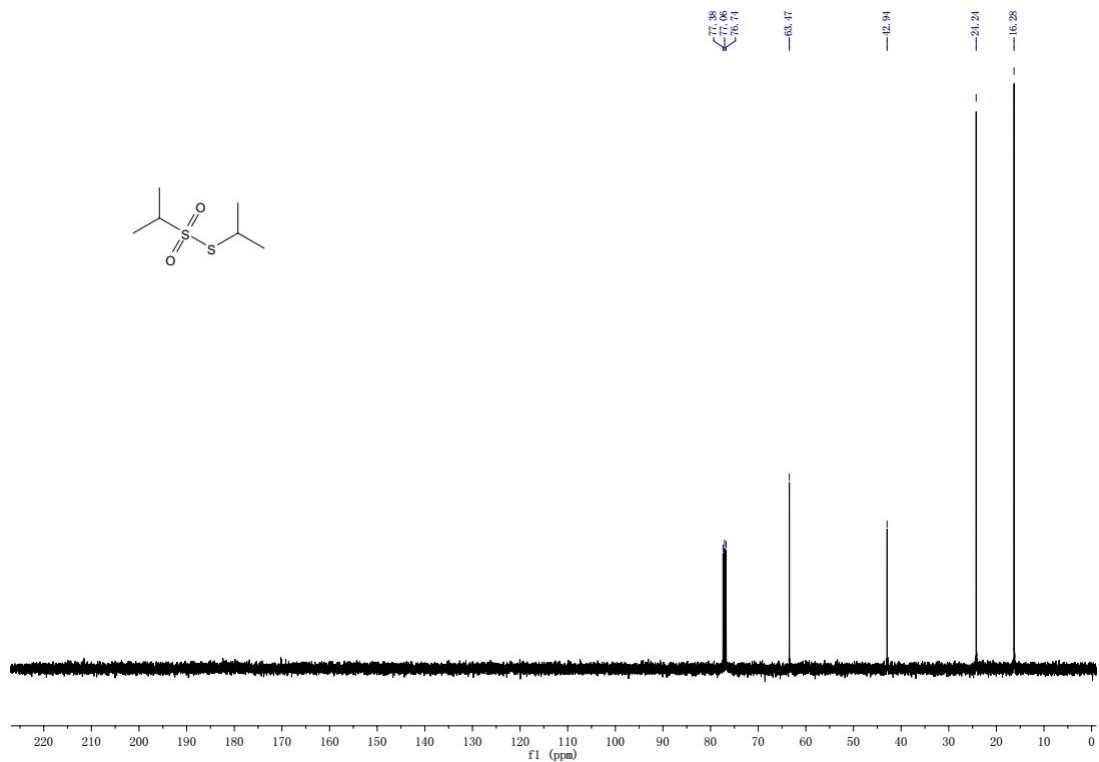

<sup>1</sup>H NMR spectrum for compound **2r** (CDCl<sub>3</sub>, 400 MHz)

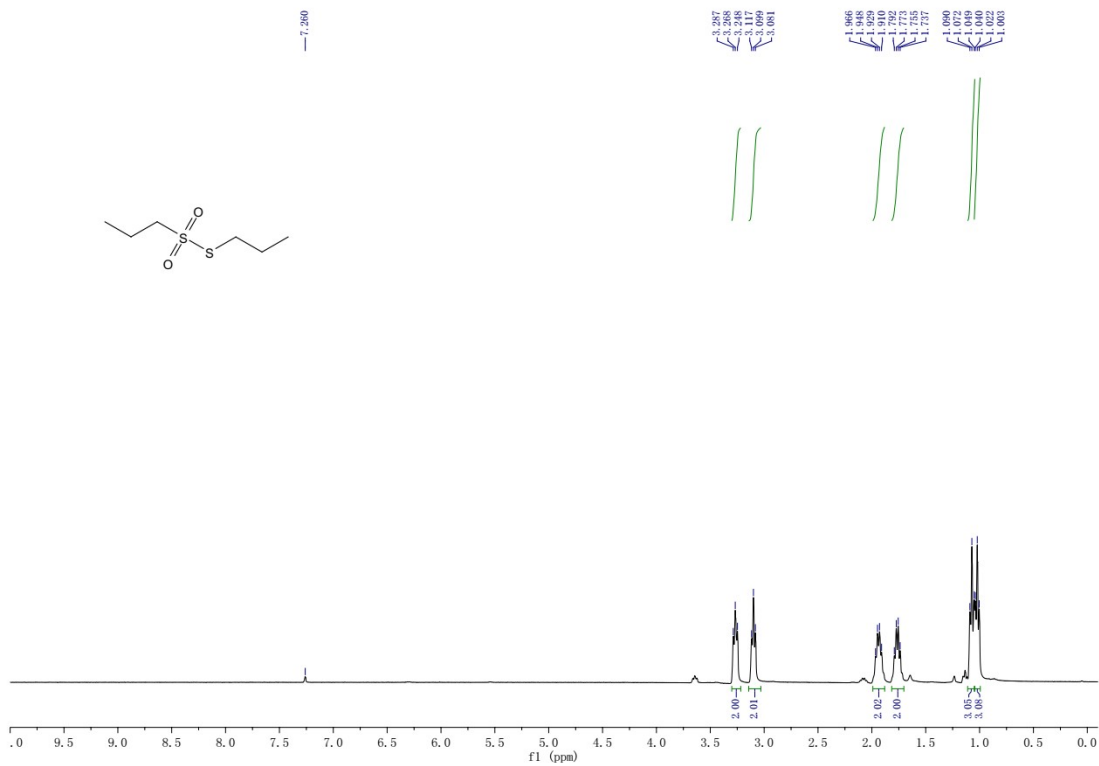

<sup>13</sup>C NMR spectrum for compound **2r** (CDCl<sub>3</sub>, 101 MHz)

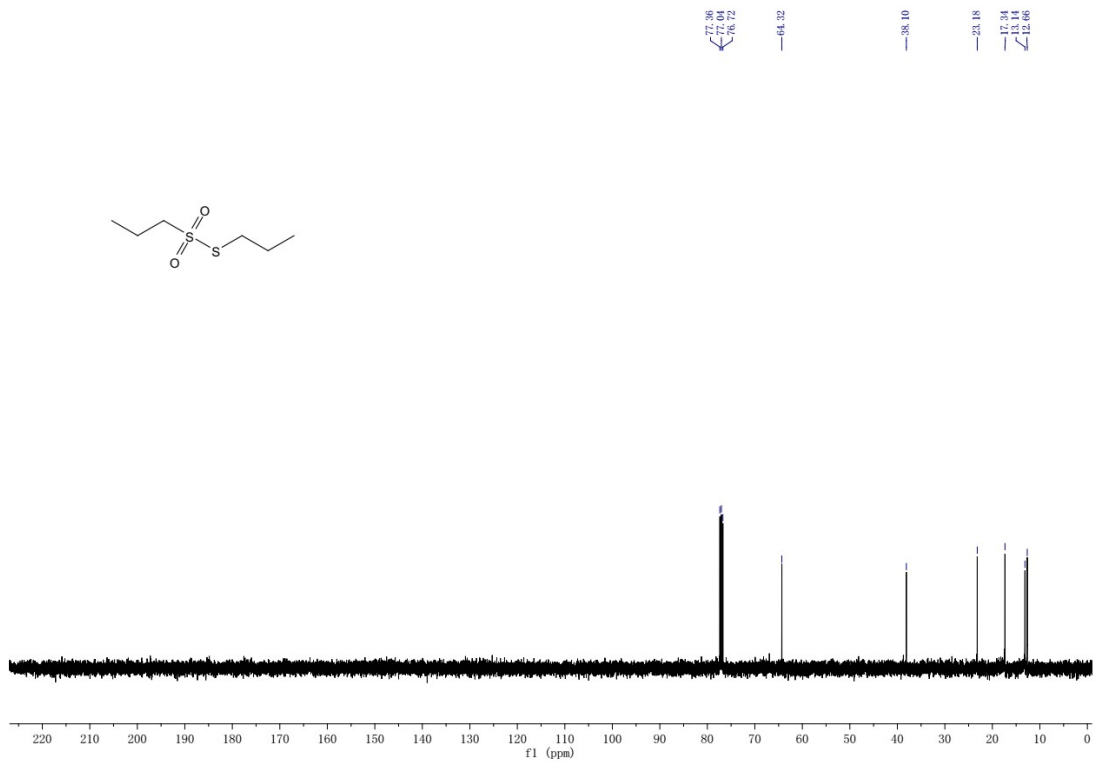

$^1\text{H}$  NMR spectrum for compound 2s (CDCl<sub>3</sub>, 400 MHz)

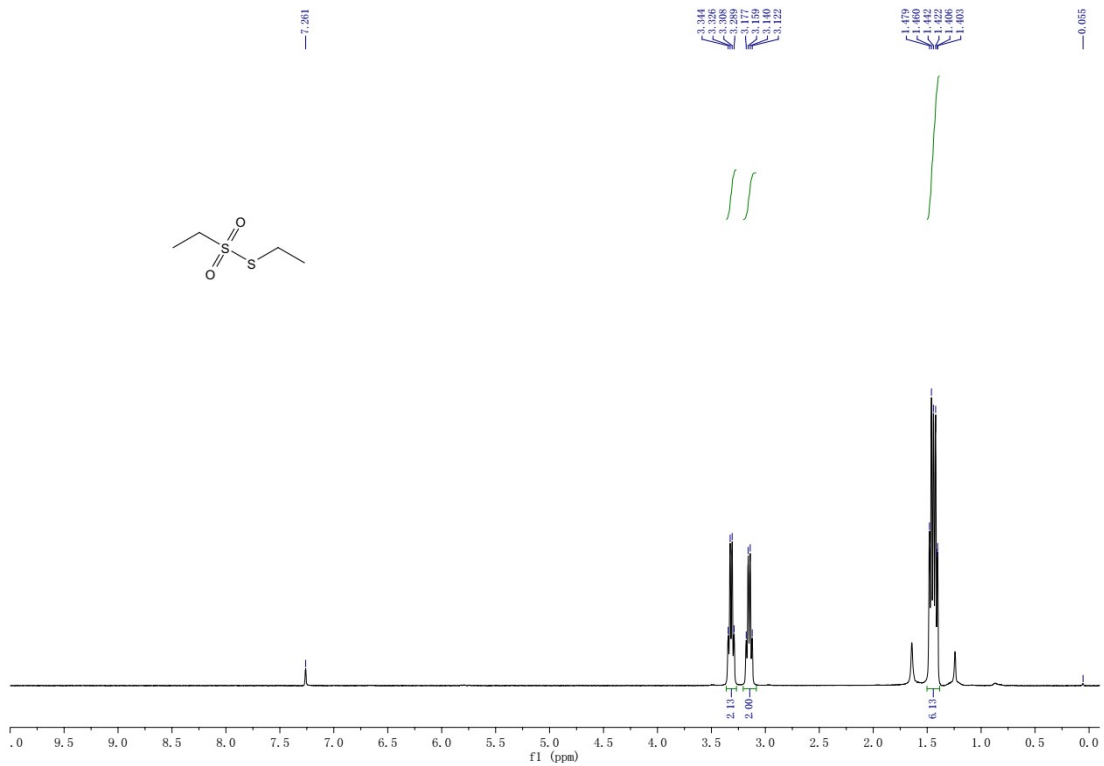

$^{13}\text{C}$  NMR spectrum for compound 2s (CDCl<sub>3</sub>, 101 MHz)

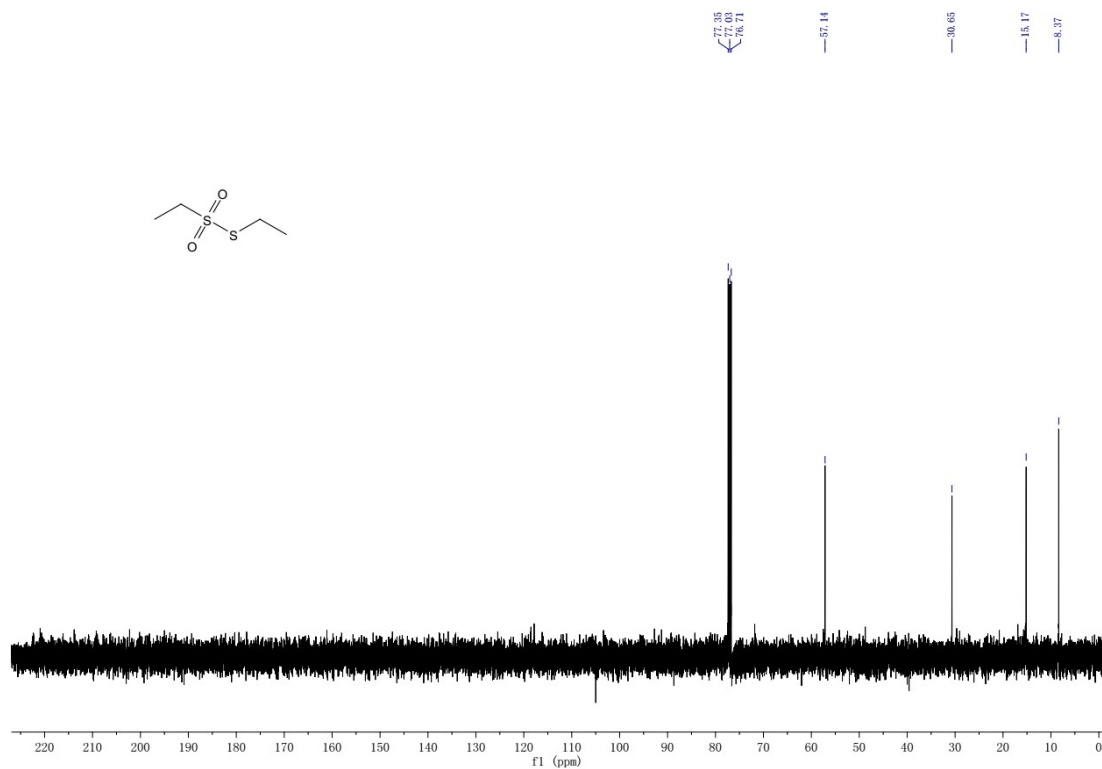

$^1\text{H}$  NMR spectrum for compound **2t** (CDCl<sub>3</sub>, 400 MHz)

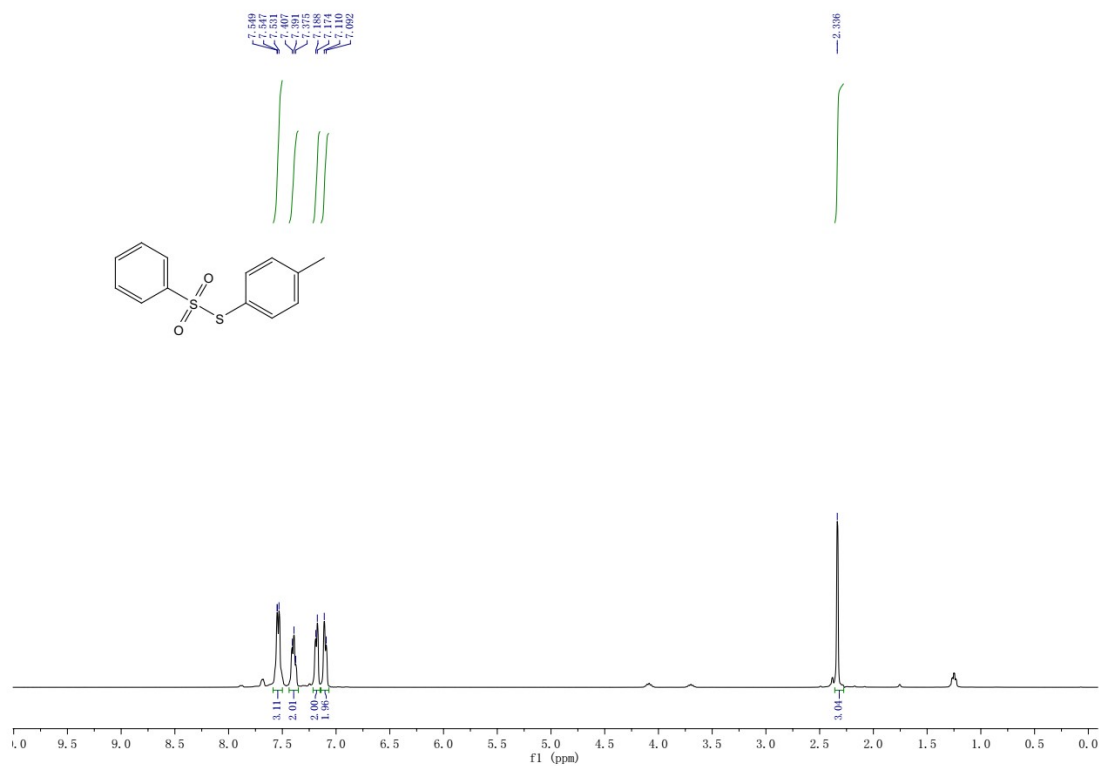

$^{13}\text{C}$  NMR spectrum for compound **2t** (CDCl<sub>3</sub>, 101 MHz)

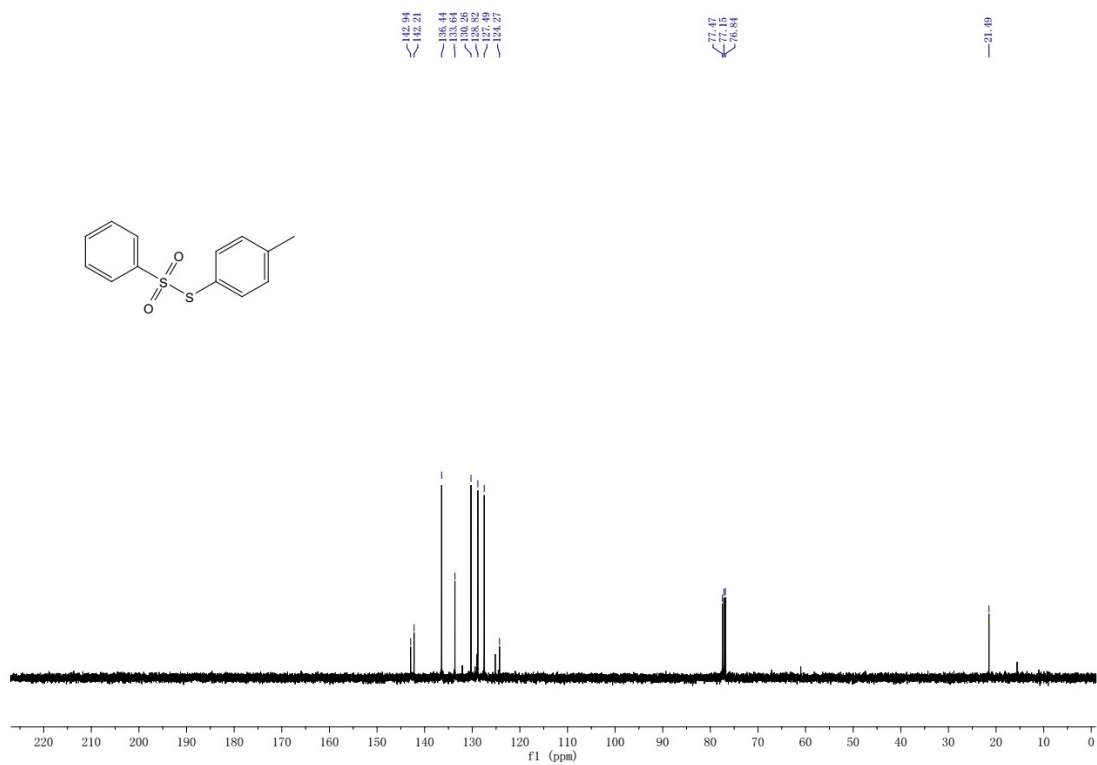

<sup>1</sup>H NMR spectrum for compound **2u** (CDCl<sub>3</sub>, 400 MHz)

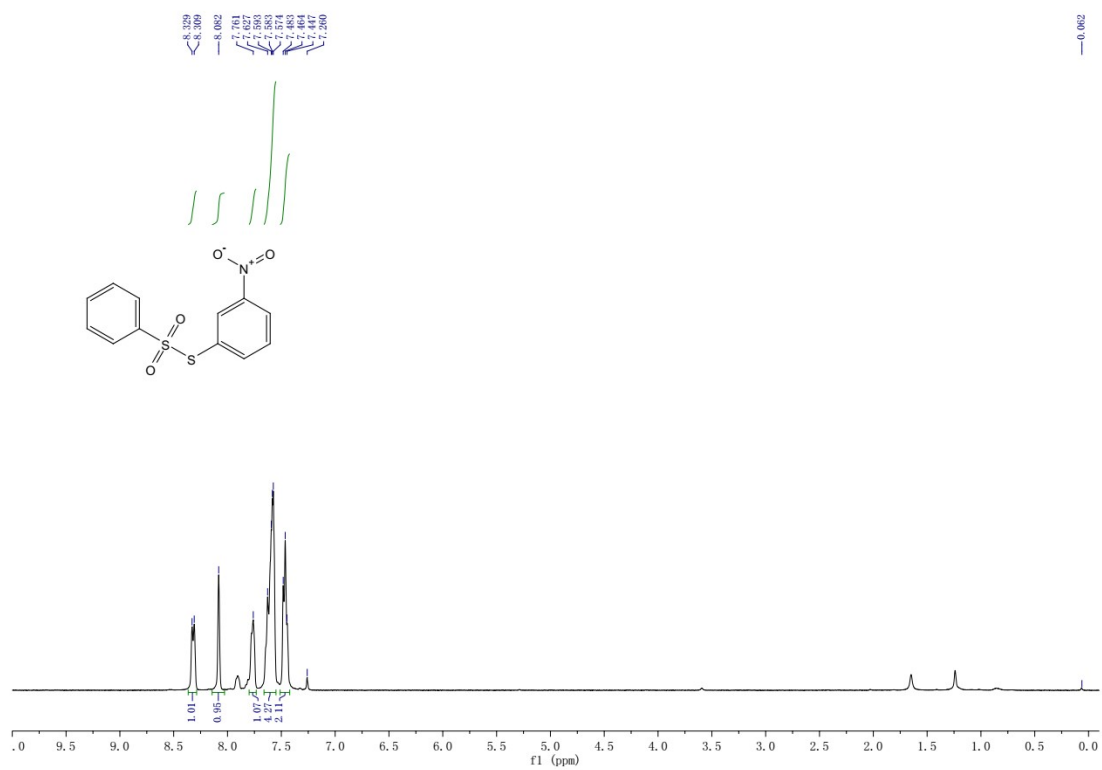

<sup>13</sup>C NMR spectrum for compound **2u** (CDCl<sub>3</sub>, 101 MHz)



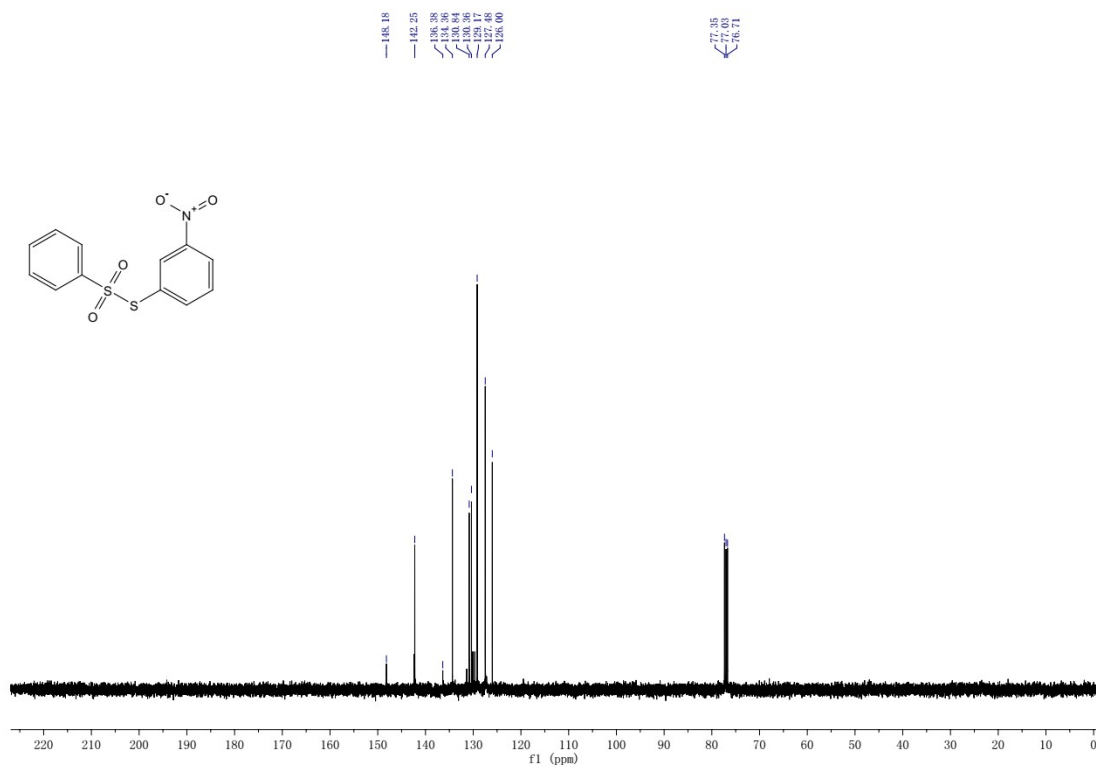

<sup>1</sup>H NMR spectrum for compound **2v** (CDCl<sub>3</sub>, 400 MHz)

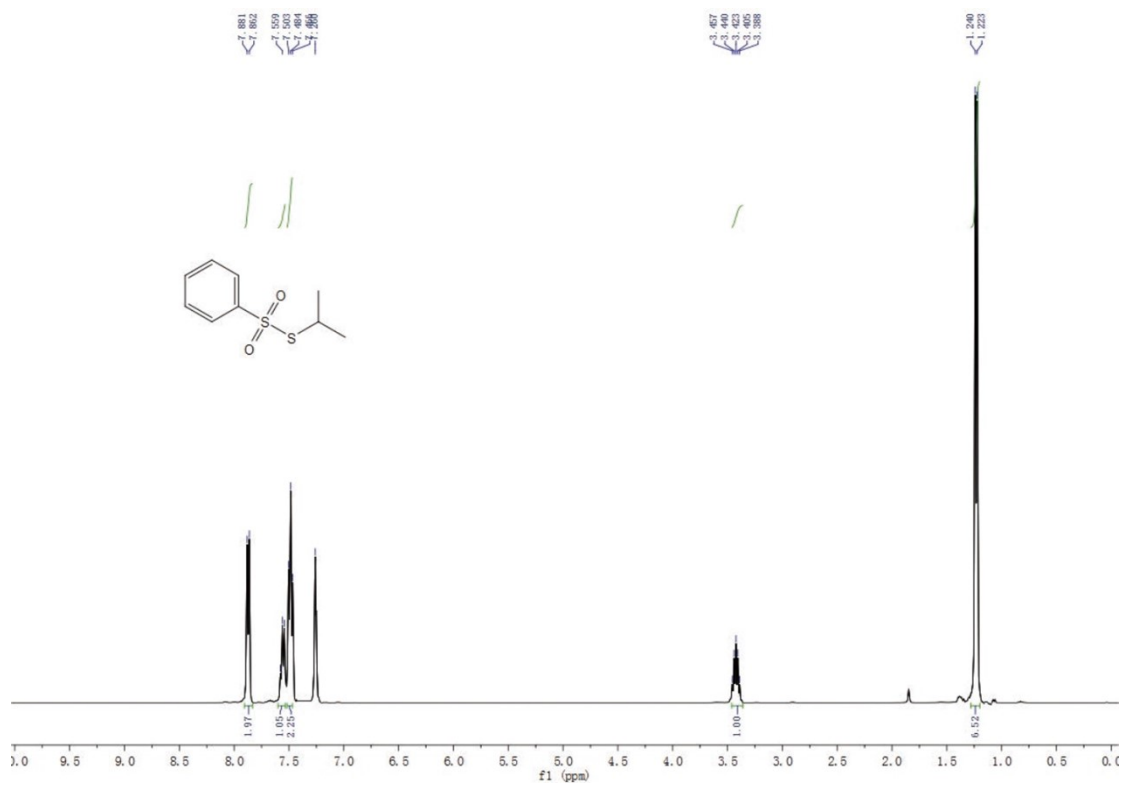

<sup>13</sup>C NMR spectrum for compound **2v** (CDCl<sub>3</sub>, 101 MHz)

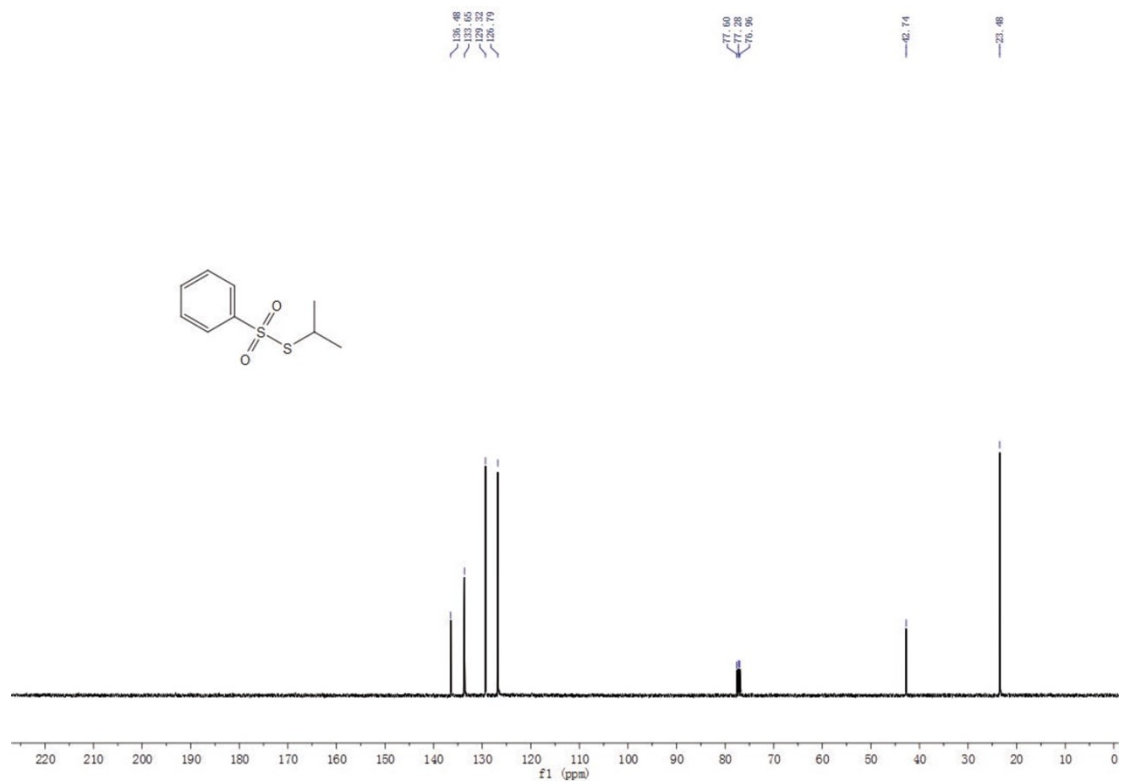

<sup>1</sup>H NMR spectrum for compound **2w** (CDCl<sub>3</sub>, 400 MHz)

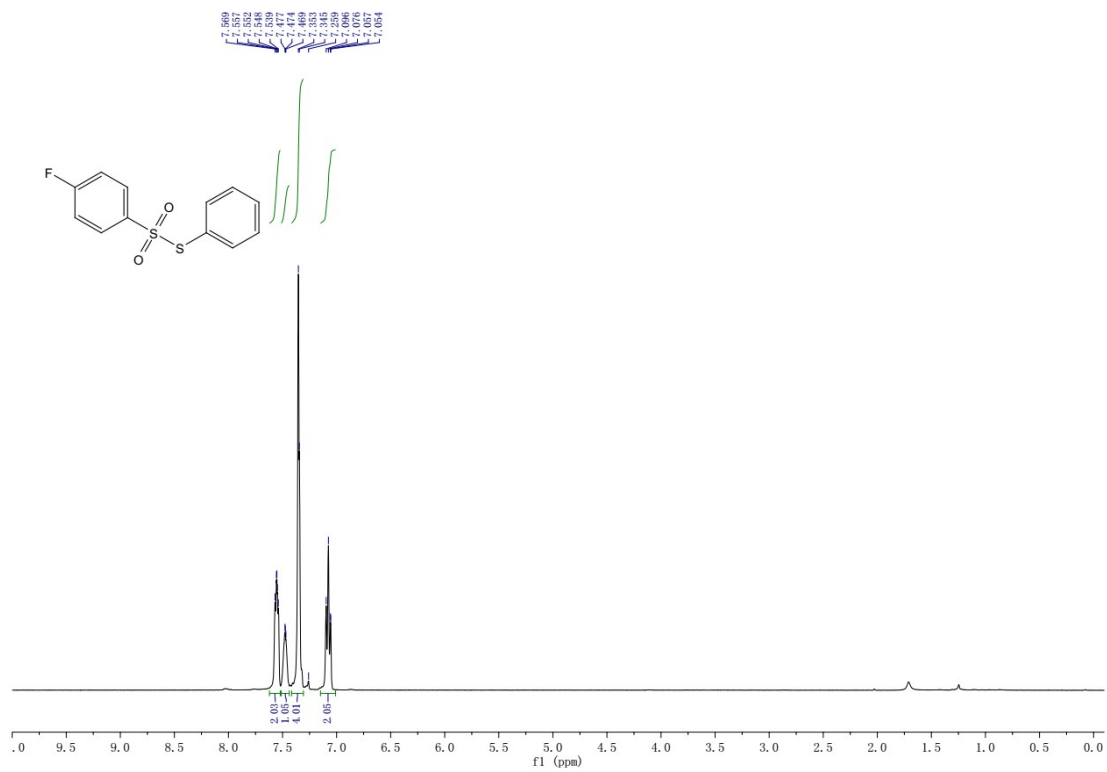

<sup>13</sup>C NMR spectrum for compound **2w** (CDCl<sub>3</sub>, 101 MHz)

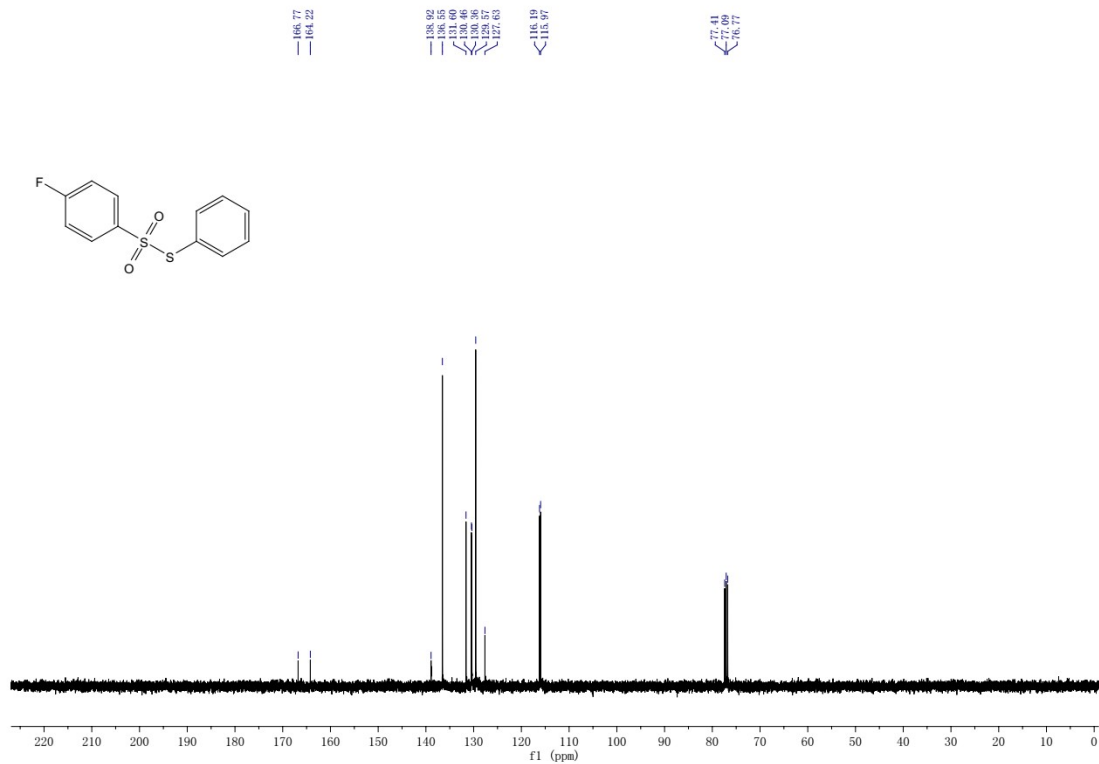

$^{13}\text{C}$  NMR spectrum for compound **2w** ( $\text{CDCl}_3$ , 376 MHz)

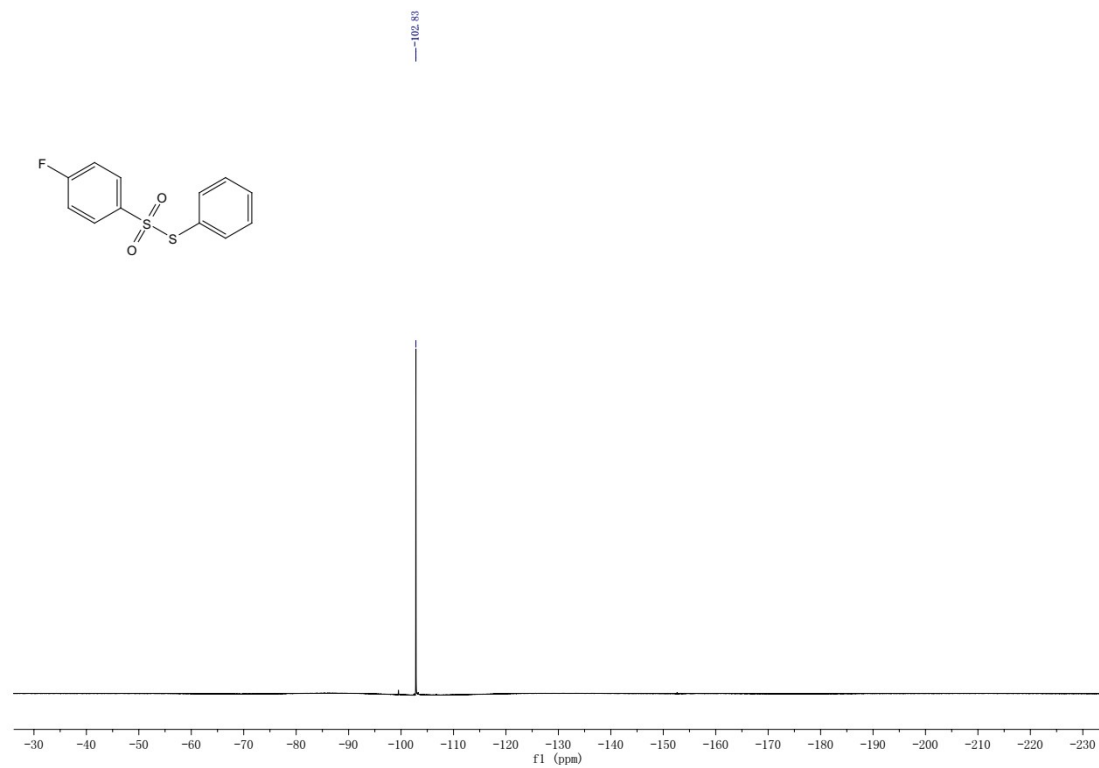

$^{19}\text{F}$  NMR spectrum for compound **2x** ( $\text{CDCl}_3$ , 400 MHz)

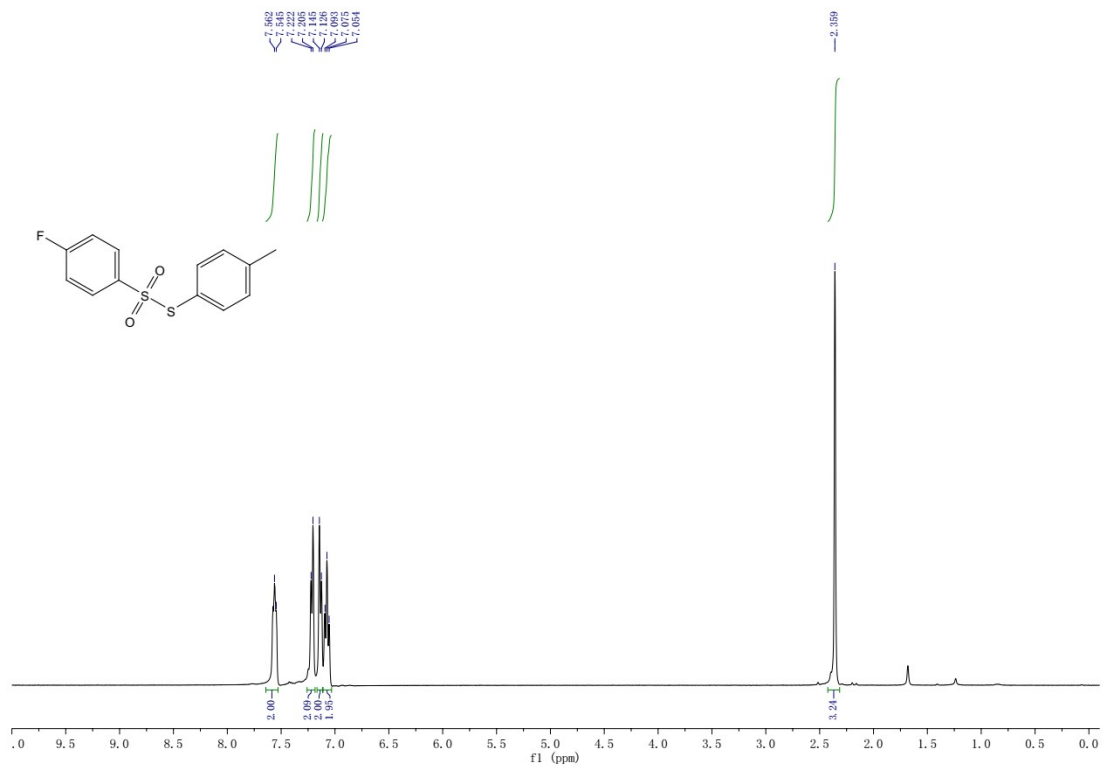

<sup>13</sup>C NMR spectrum for compound **2x** (CDCl<sub>3</sub>, 101 MHz)

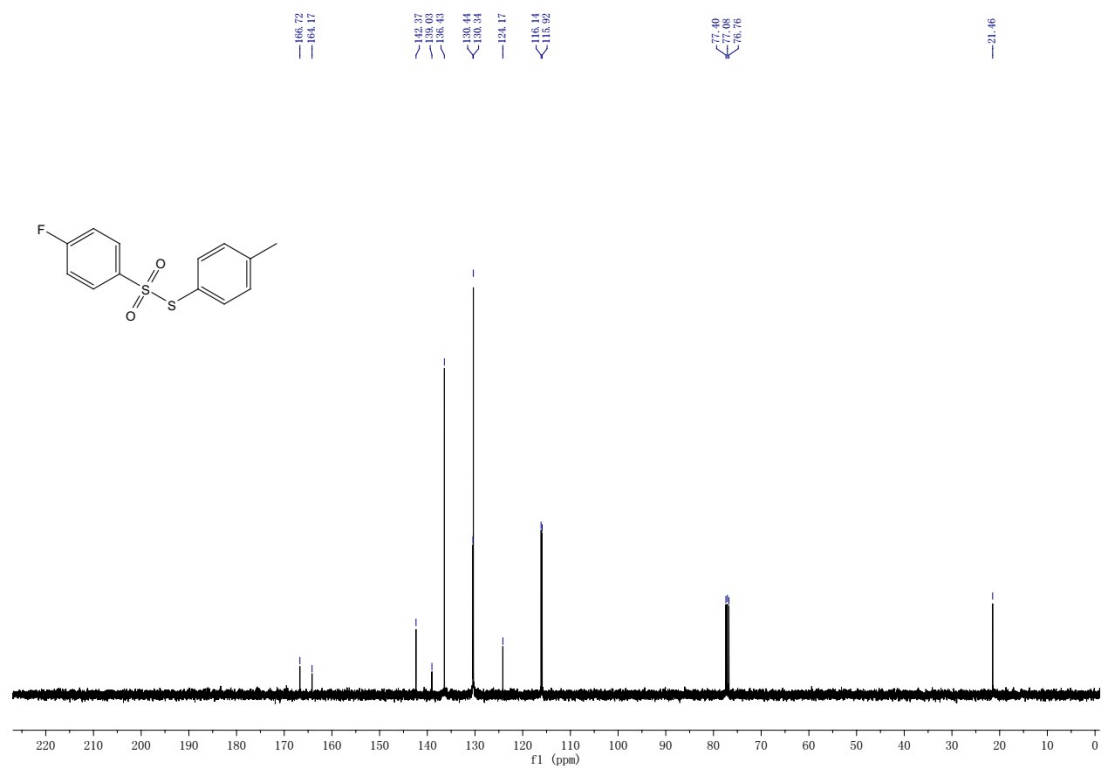

<sup>19</sup>F NMR spectrum for compound **2x** (CDCl<sub>3</sub>, 376 MHz)

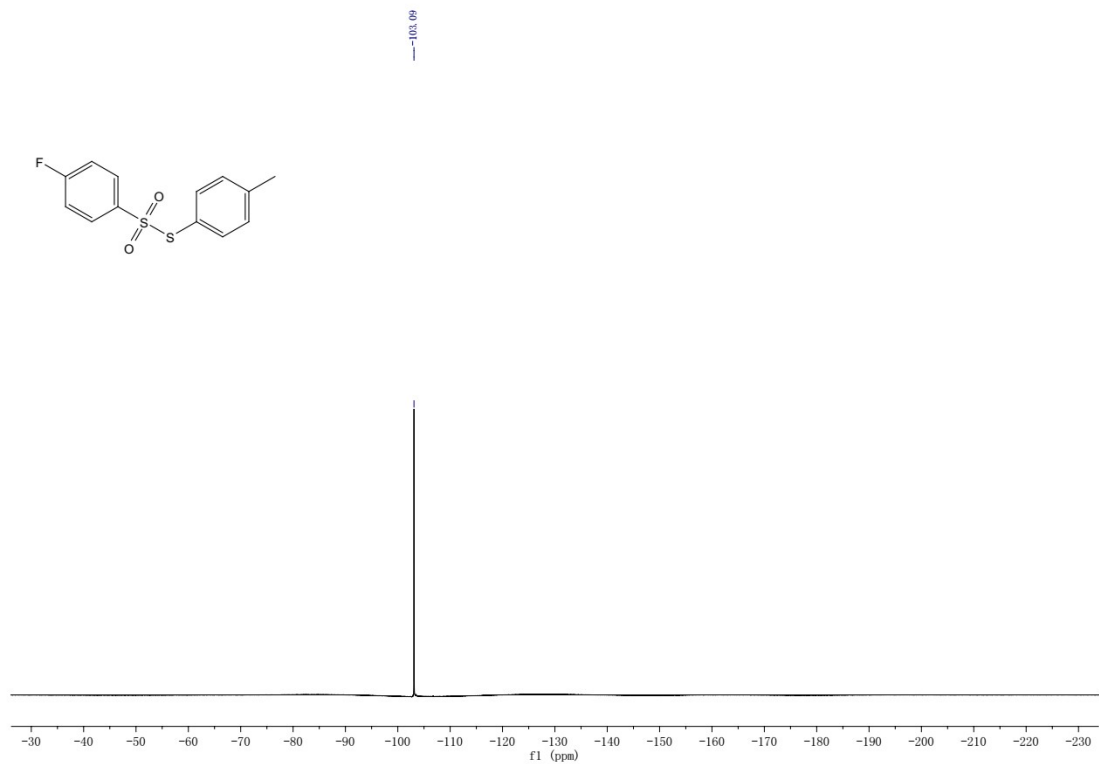

<sup>1</sup>H NMR spectrum for compound **2y** (CDCl<sub>3</sub>, 400 MHz)

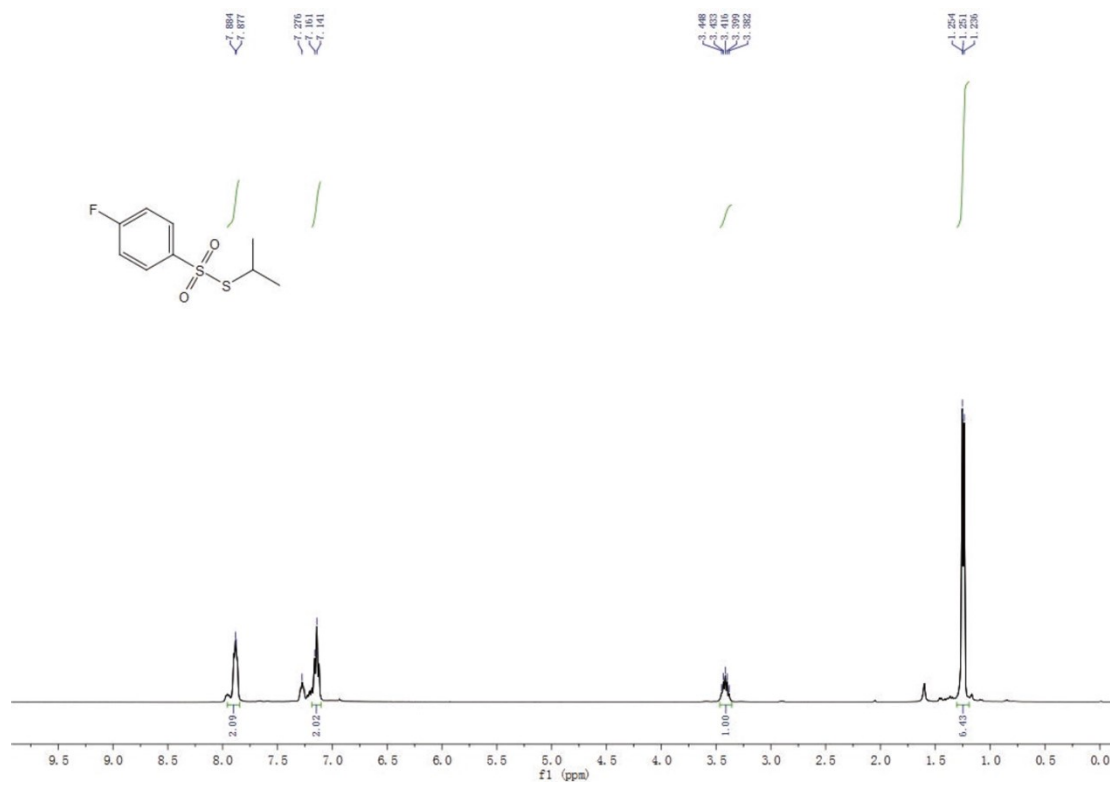

<sup>13</sup>C NMR spectrum for compound **2y** (CDCl<sub>3</sub>, 101 MHz)

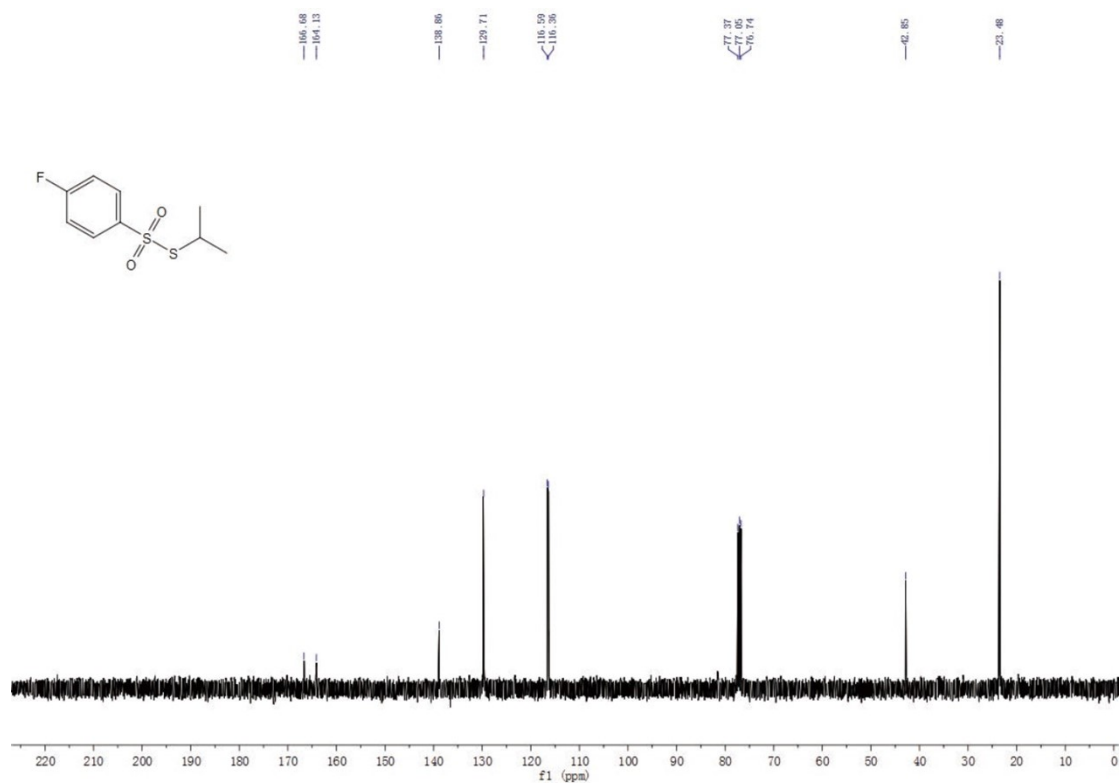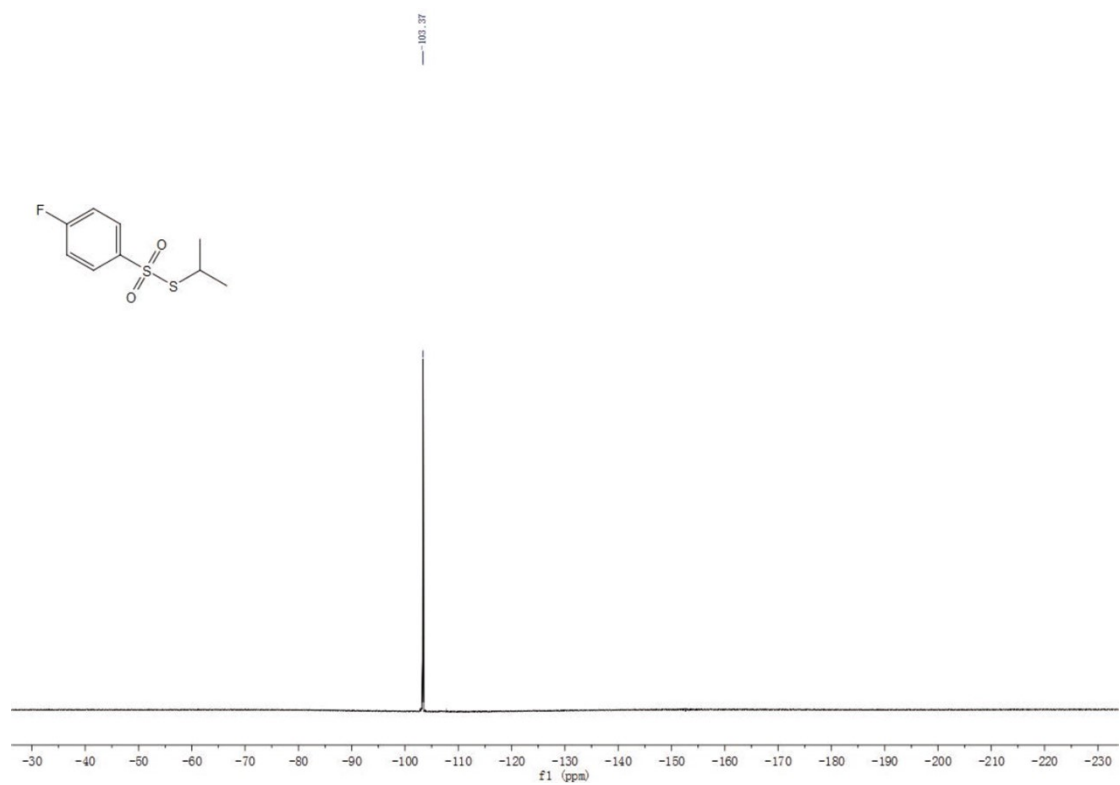

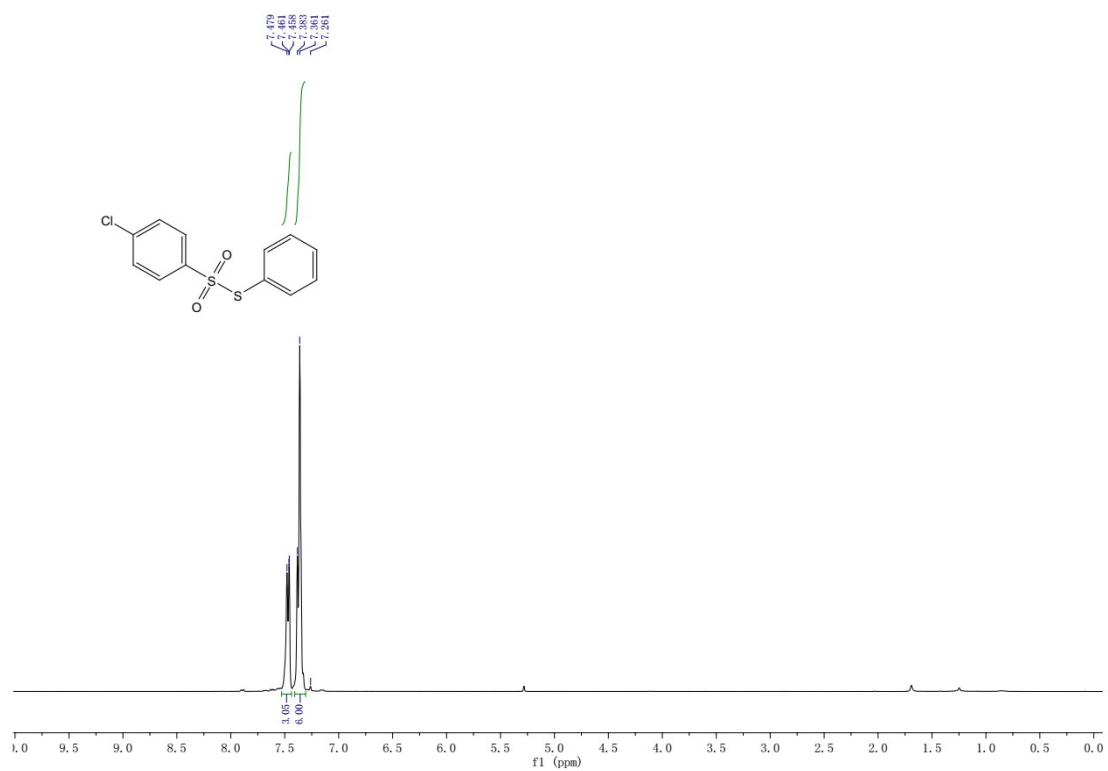

$^{13}\text{C}$  NMR spectrum for compound **2x** ( $\text{CDCl}_3$ , 101 MHz)

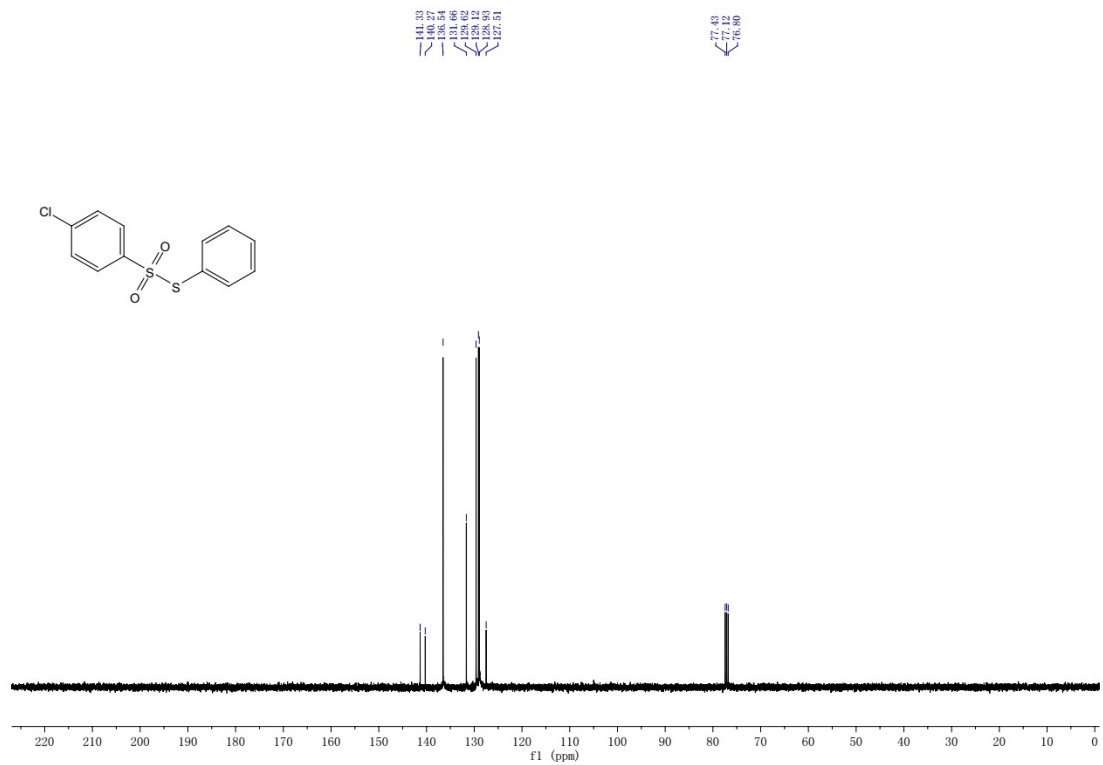

$^1\text{H}$  NMR spectrum for compound **2aa** ( $\text{CDCl}_3$ , 400 MHz)

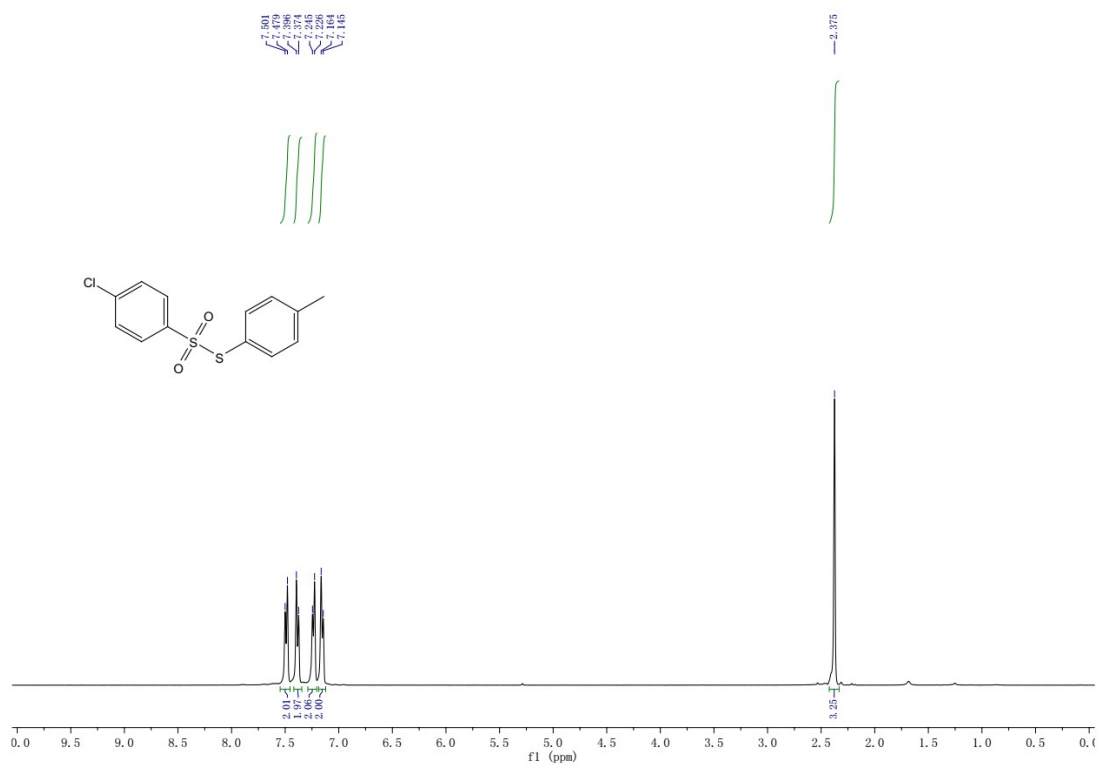

<sup>13</sup>C NMR spectrum for compound **2aa** (CDCl<sub>3</sub>, 101 MHz)

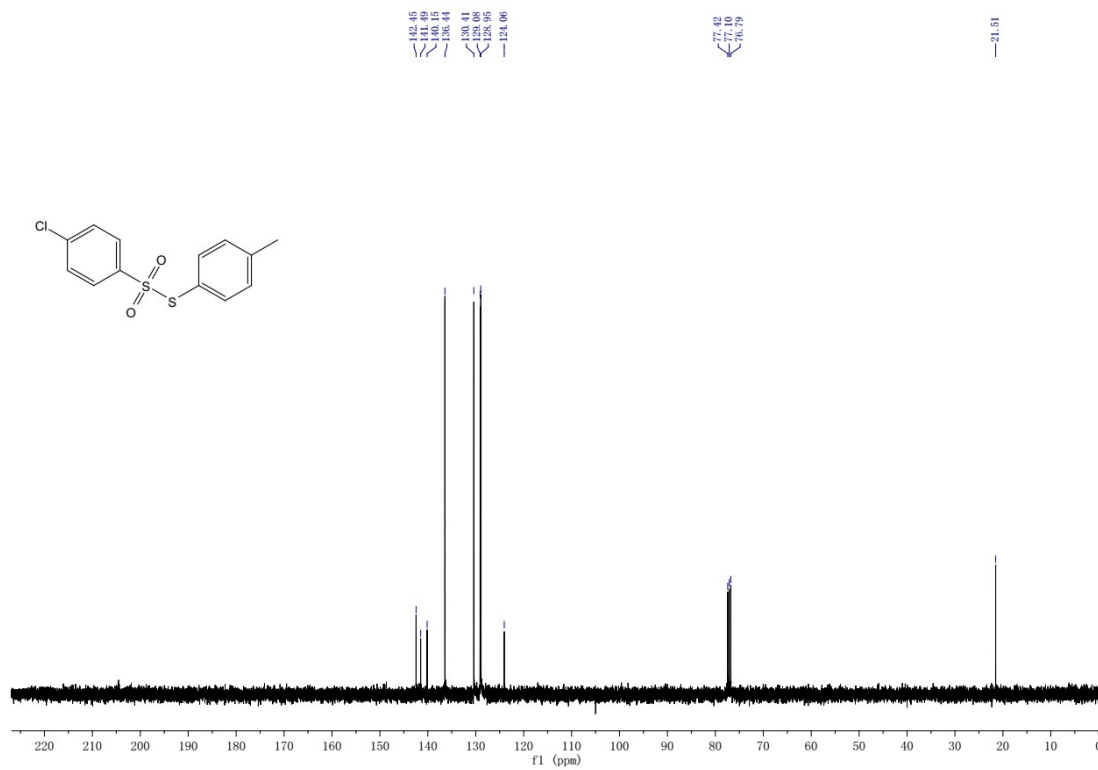

<sup>1</sup>H NMR spectrum for compound **2ab** (CDCl<sub>3</sub>, 400 MHz)



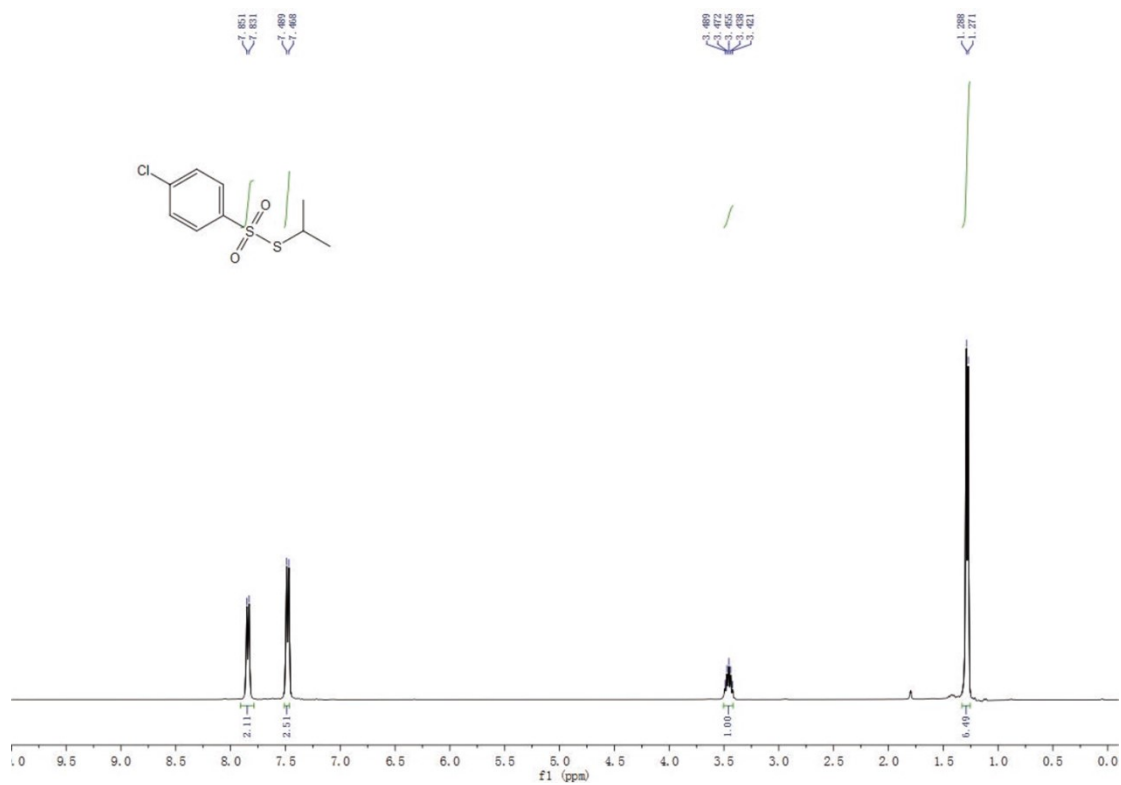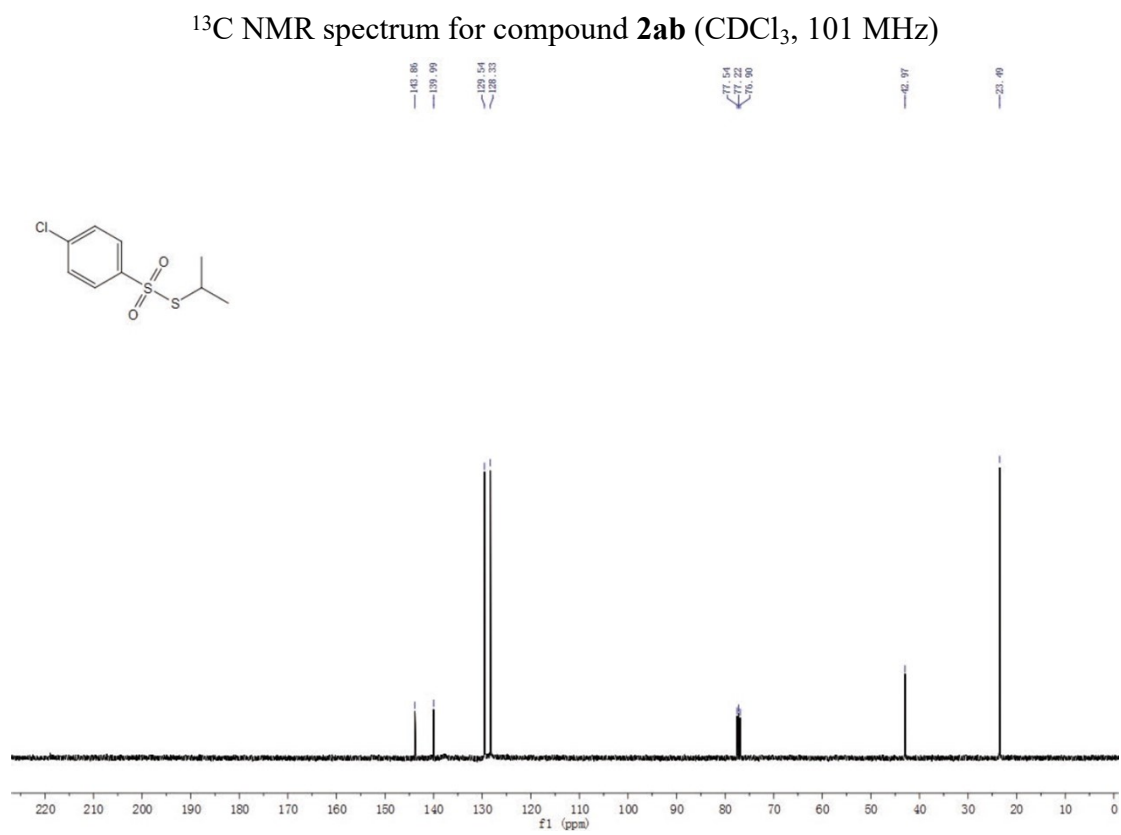

<sup>1</sup>H NMR spectrum for compound **2ac** (CDCl<sub>3</sub>, 400 MHz)

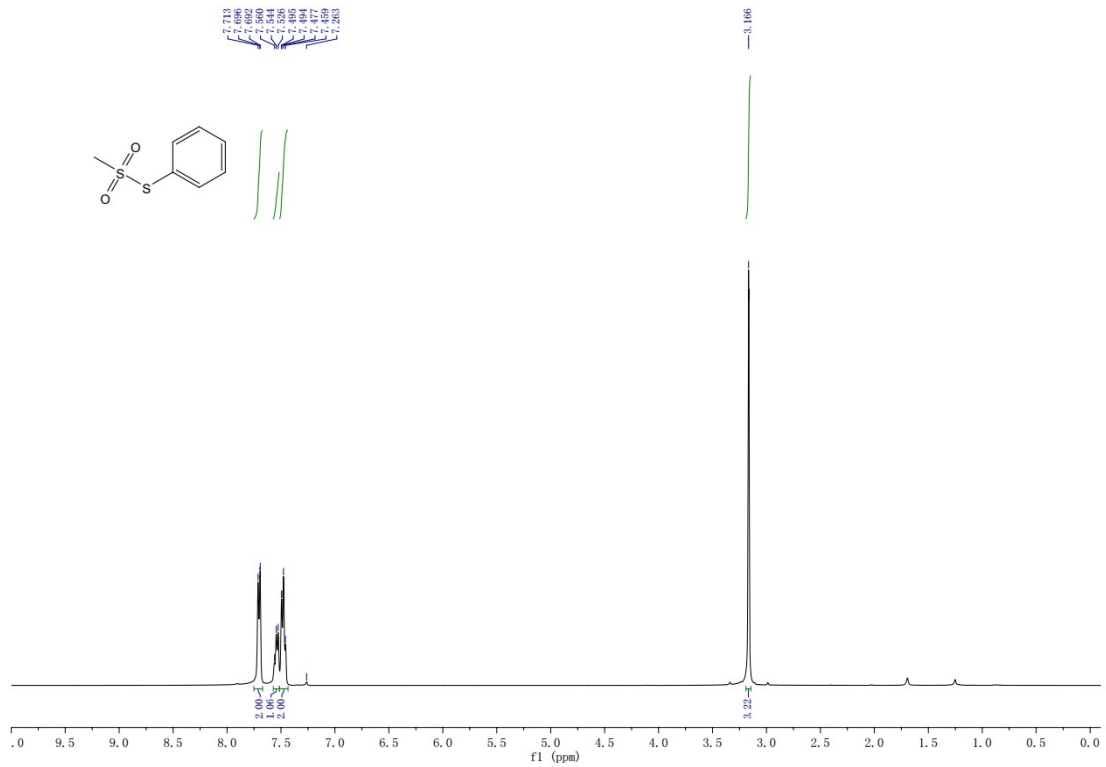

$^{13}\text{C}$  NMR spectrum for compound **2ac** ( $\text{CDCl}_3$ , 101 MHz)

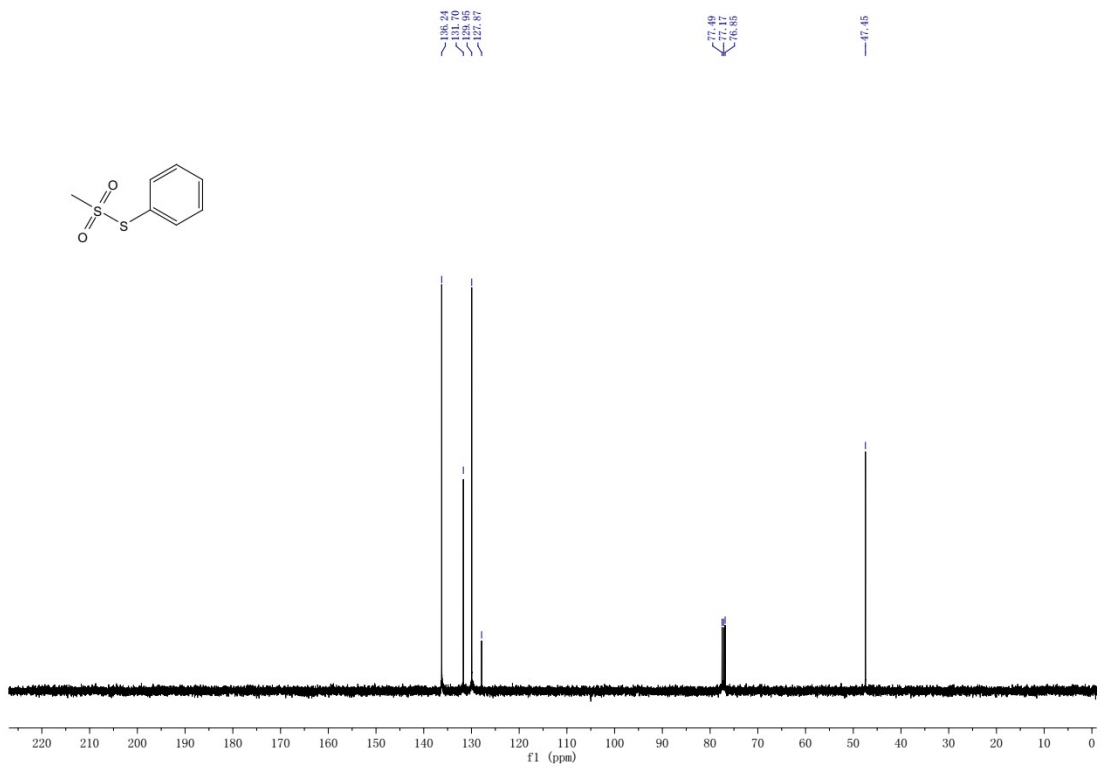

$^1\text{H}$  NMR spectrum for compound **2ad** ( $\text{CDCl}_3$ , 400 MHz)

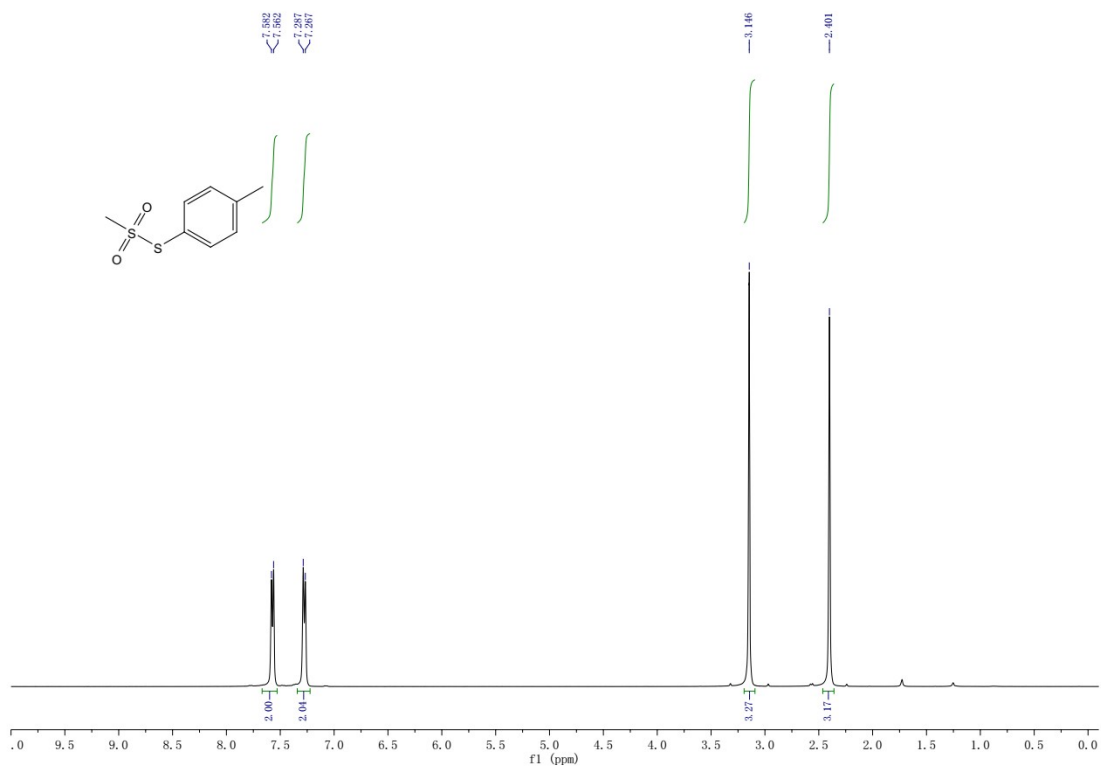

<sup>13</sup>C NMR spectrum for compound **2ad** (CDCl<sub>3</sub>, 101 MHz)

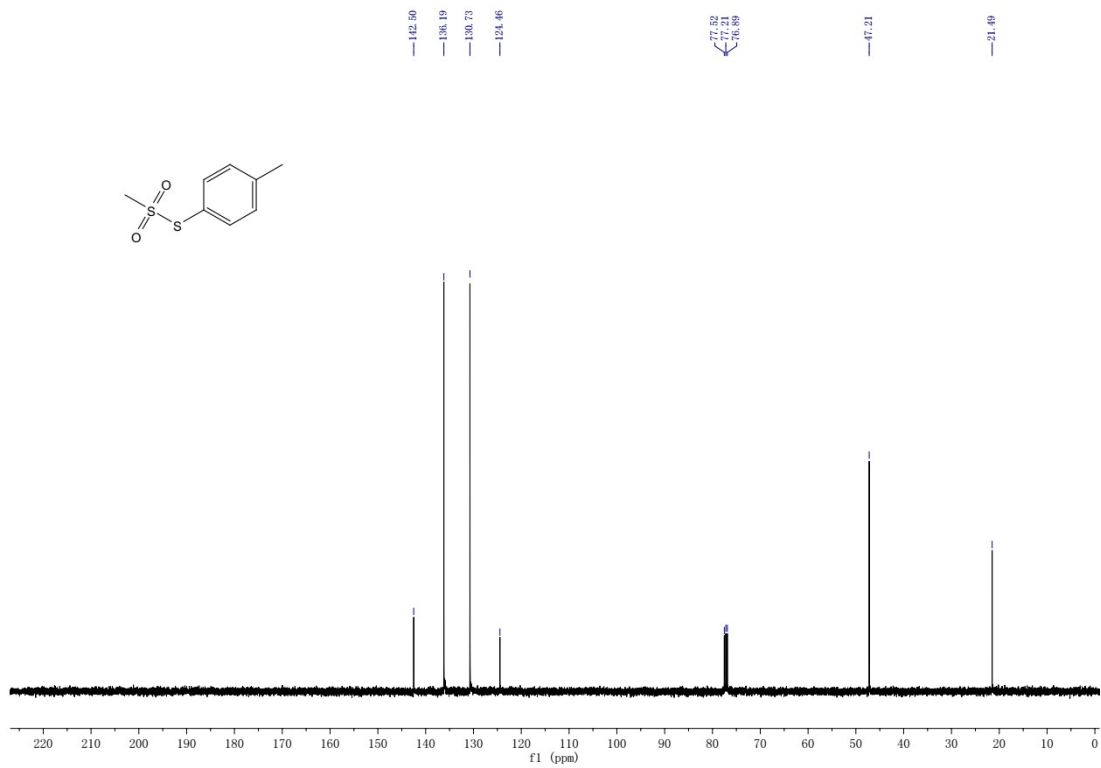

<sup>1</sup>H NMR spectrum for compound **2ae** (CDCl<sub>3</sub>, 400 MHz)

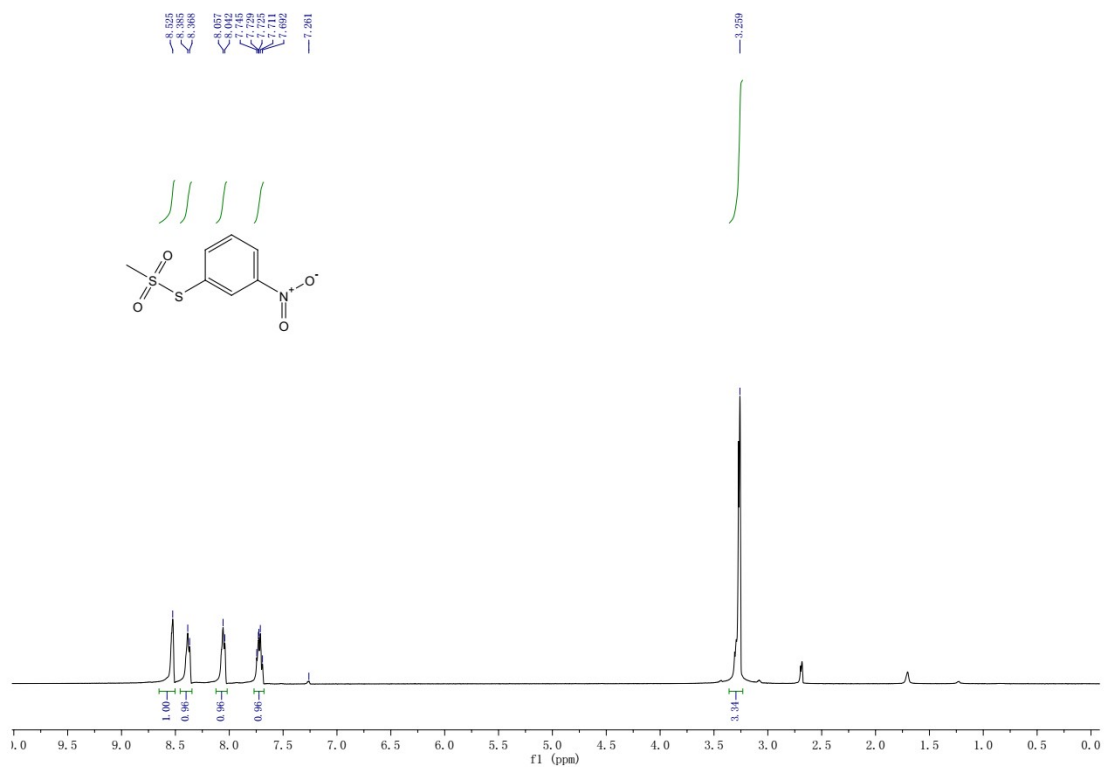

<sup>13</sup>C NMR spectrum for compound **2ae** (CDCl<sub>3</sub>, 101 MHz)

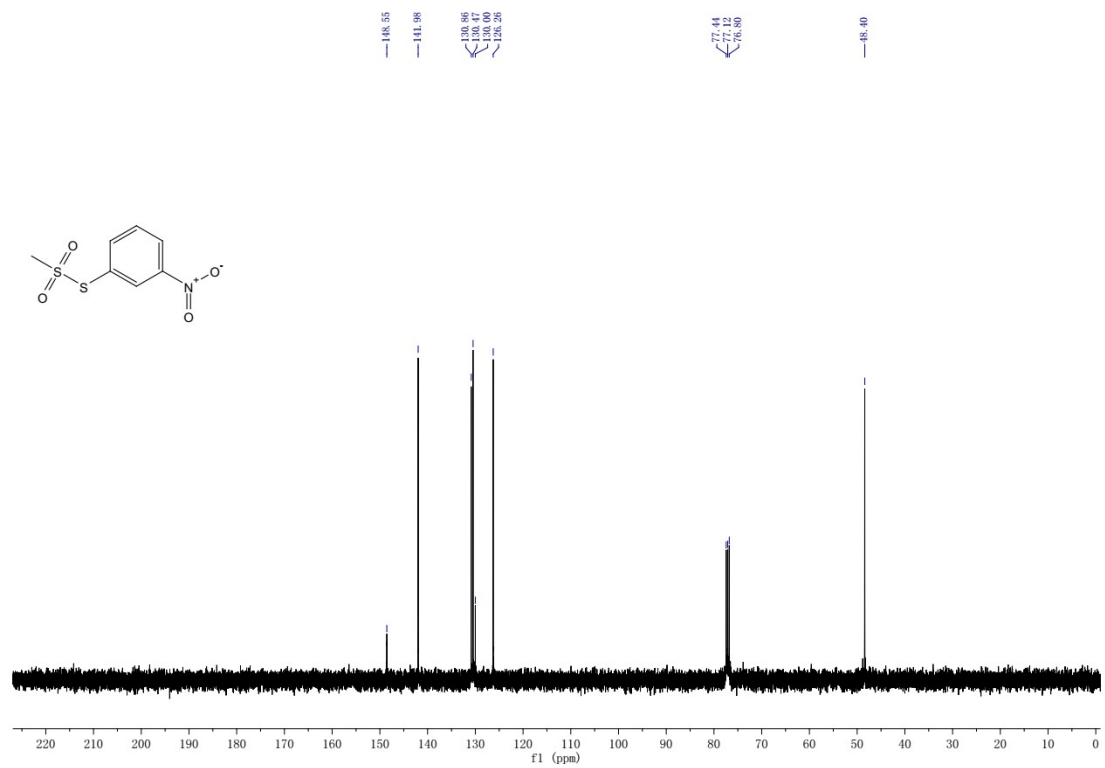

<sup>1</sup>H NMR spectrum for compound **3a** (CDCl<sub>3</sub>, 400 MHz)

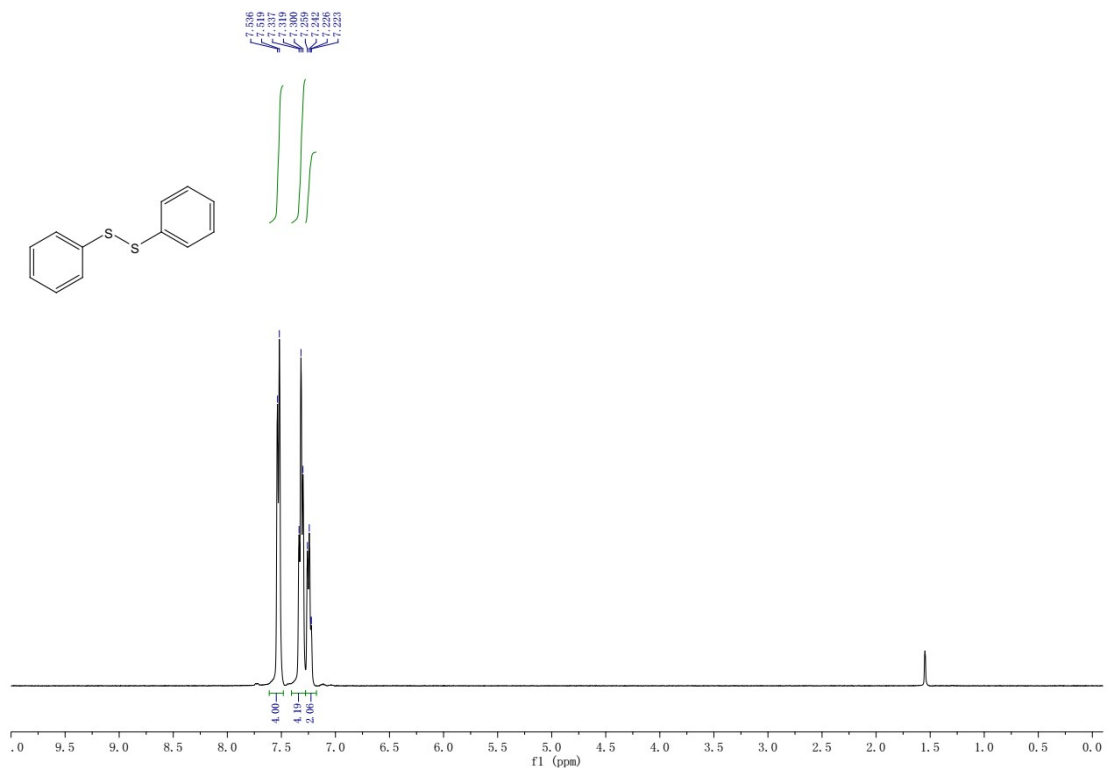

$^{13}\text{C}$  NMR spectrum for compound **3a** ( $\text{CDCl}_3$ , 101 MHz)

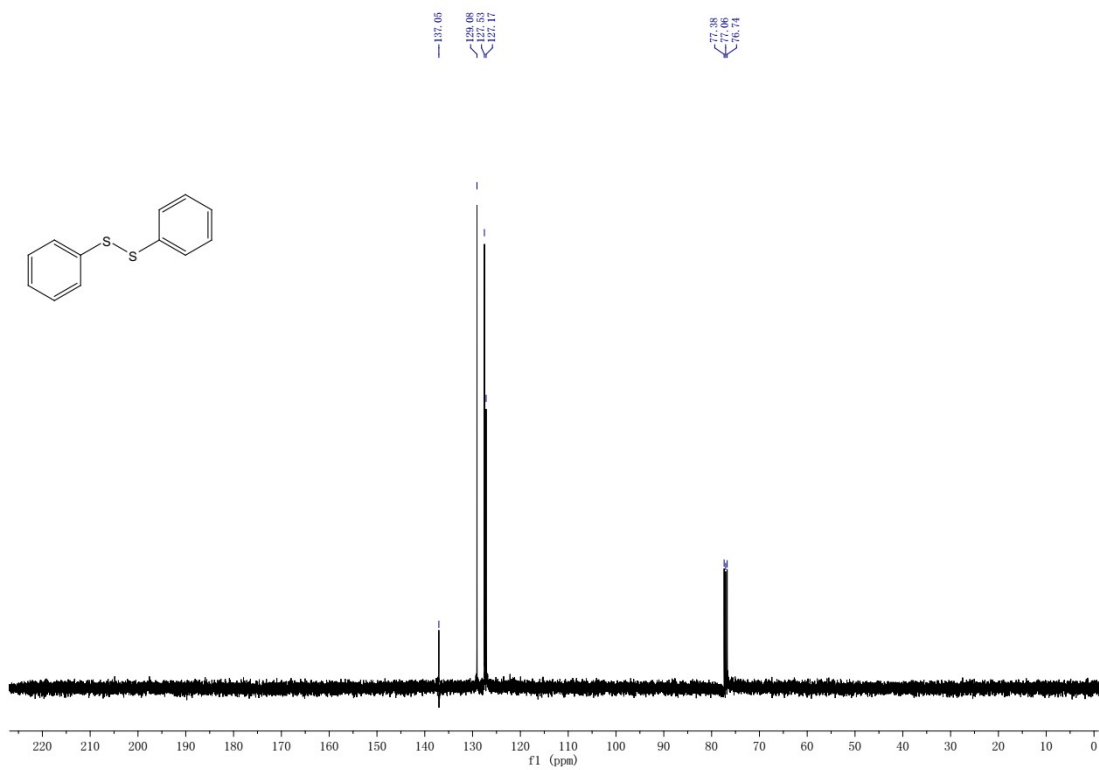

$^1\text{H}$  NMR spectrum for compound **3b** ( $\text{CDCl}_3$ , 400 MHz)

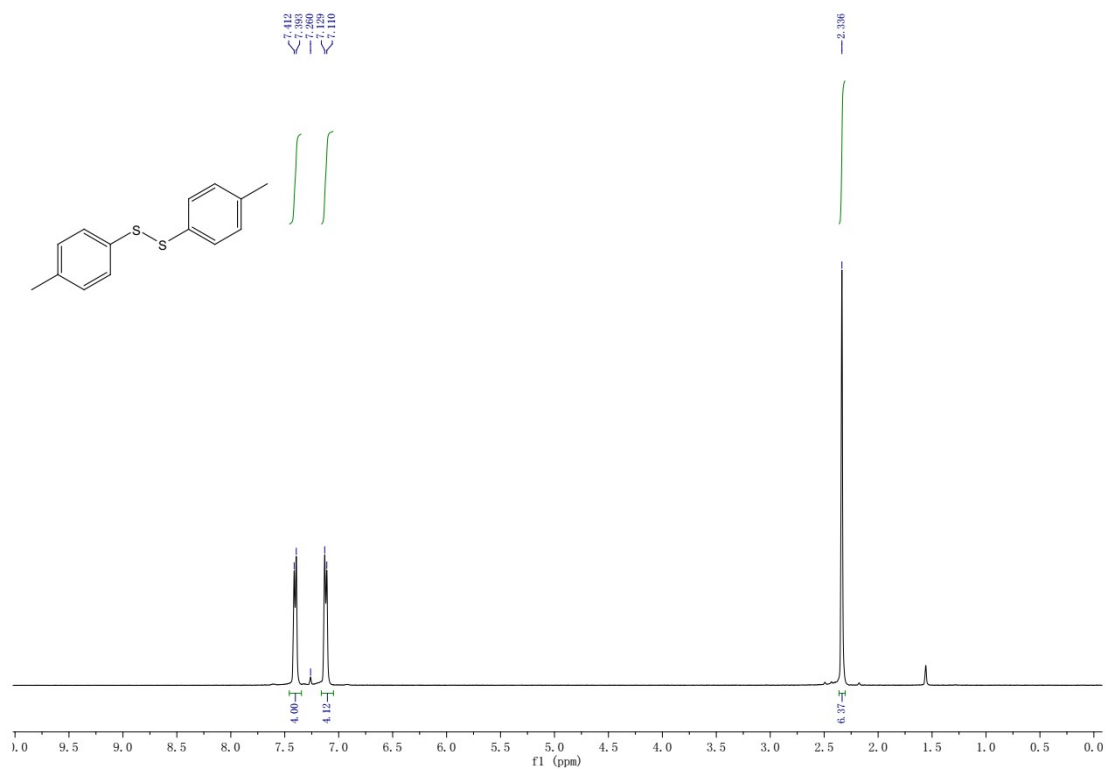

<sup>13</sup>C NMR spectrum for compound **3b** (CDCl<sub>3</sub>, 101 MHz)

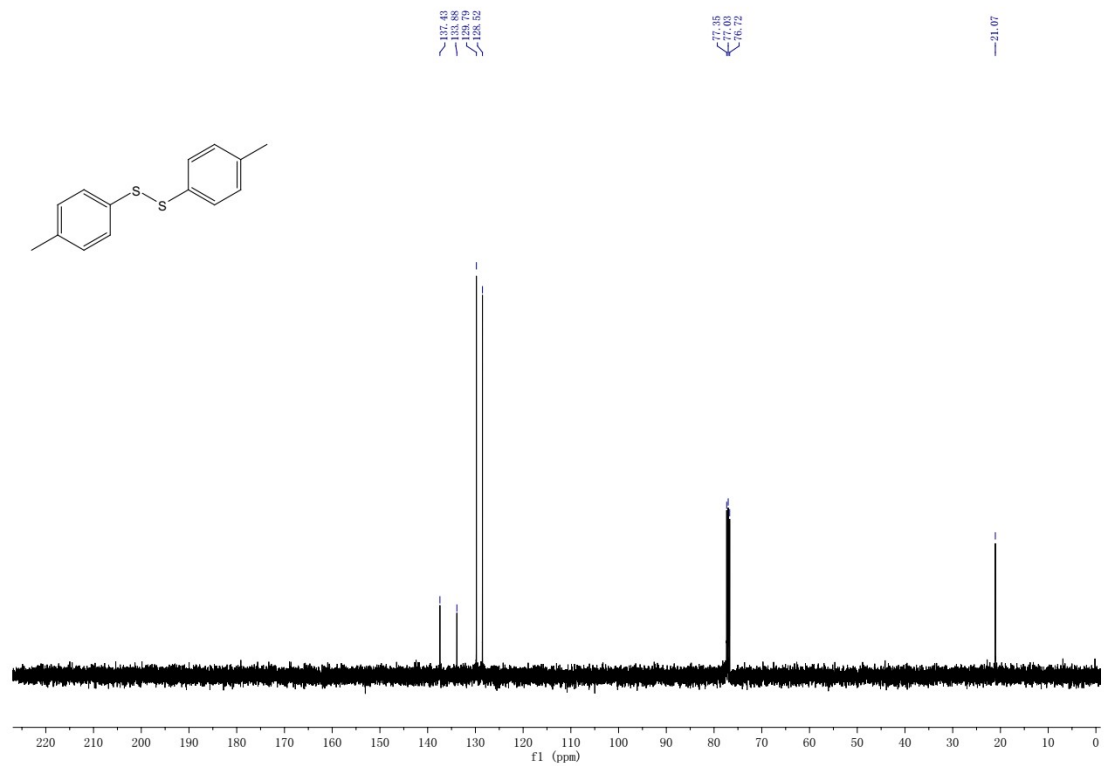

<sup>1</sup>H NMR spectrum for compound **3c** (CDCl<sub>3</sub>, 400 MHz)

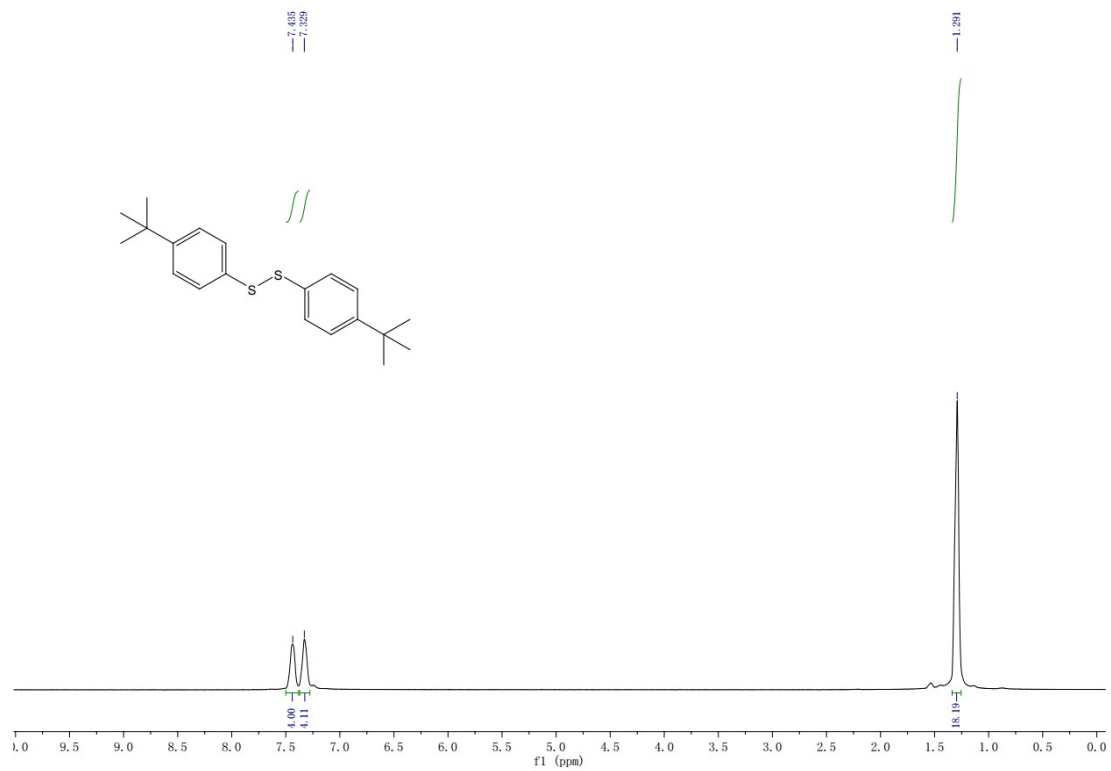

$^{13}\text{C}$  NMR spectrum for compound **3c** (CDCl<sub>3</sub>, 101 MHz)

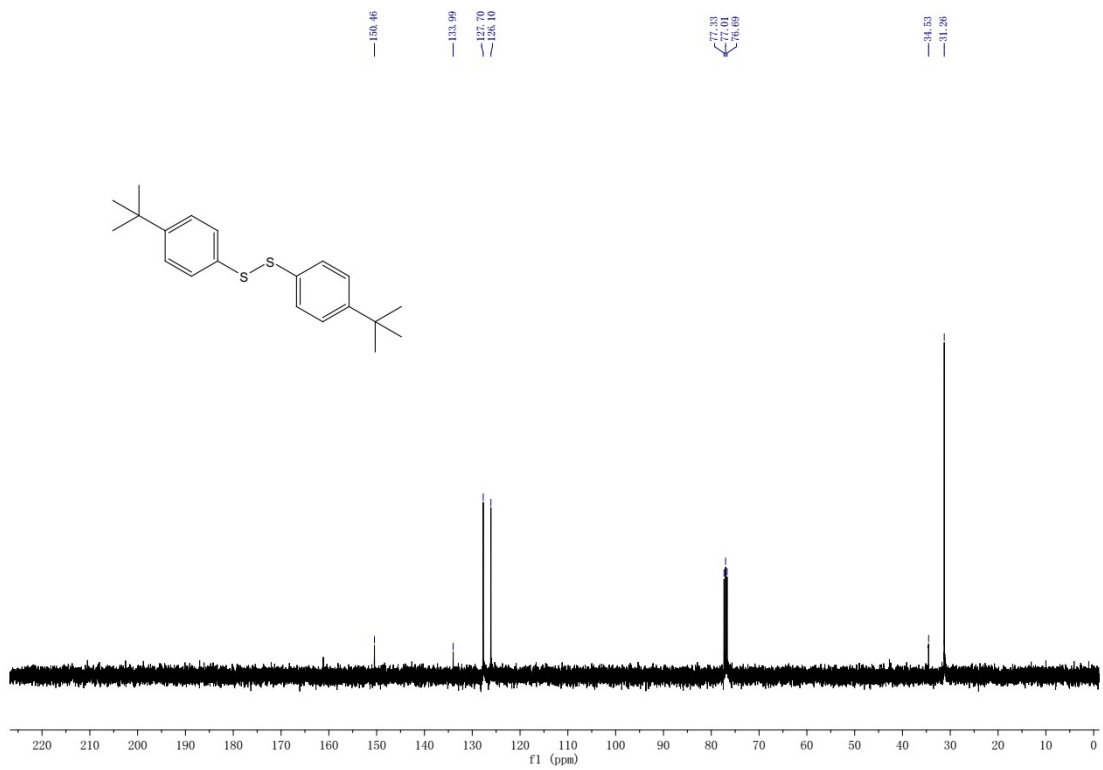

$^1\text{H}$  NMR spectrum for compound **3d** (CDCl<sub>3</sub>, 400 MHz)

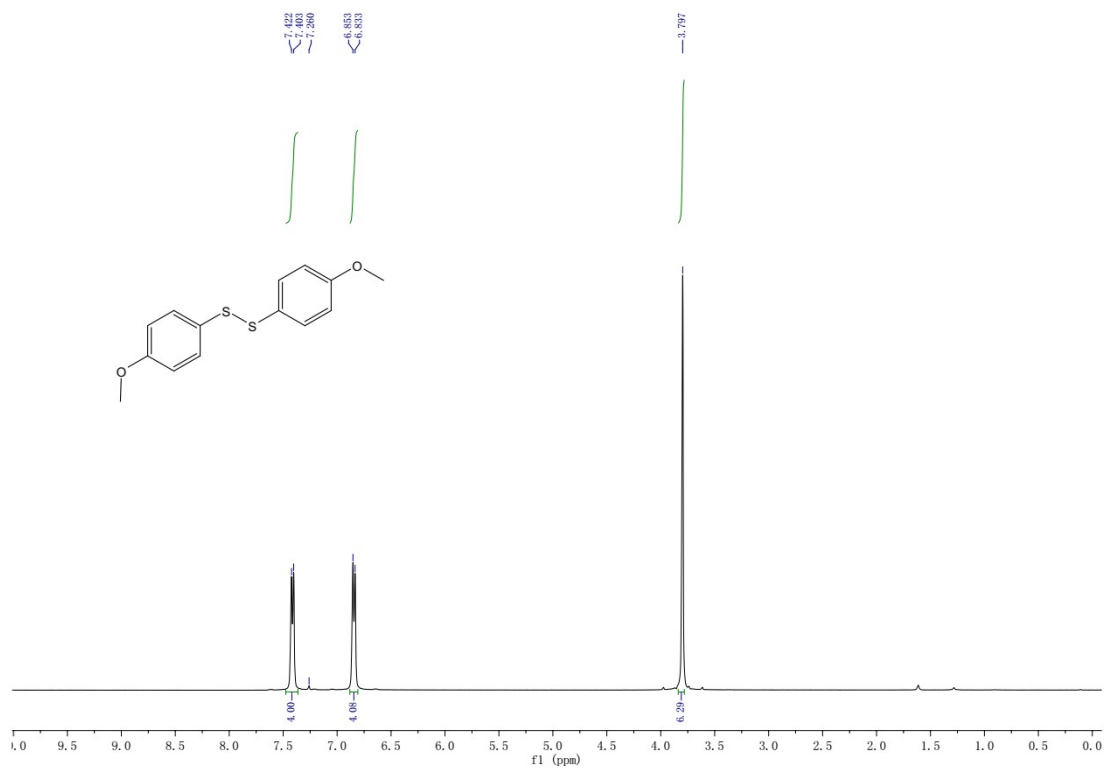

<sup>13</sup>C NMR spectrum for compound **3d** (CDCl<sub>3</sub>, 101 MHz)

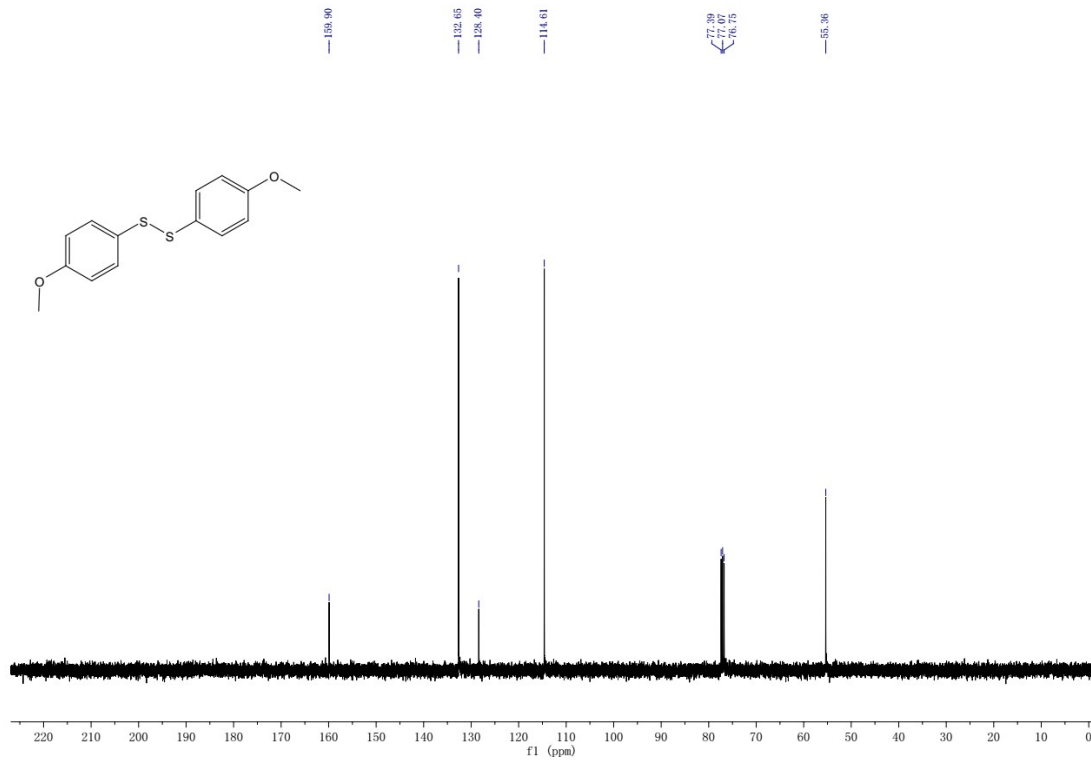

<sup>1</sup>H NMR spectrum for compound **3e** (CDCl<sub>3</sub>, 400 MHz)



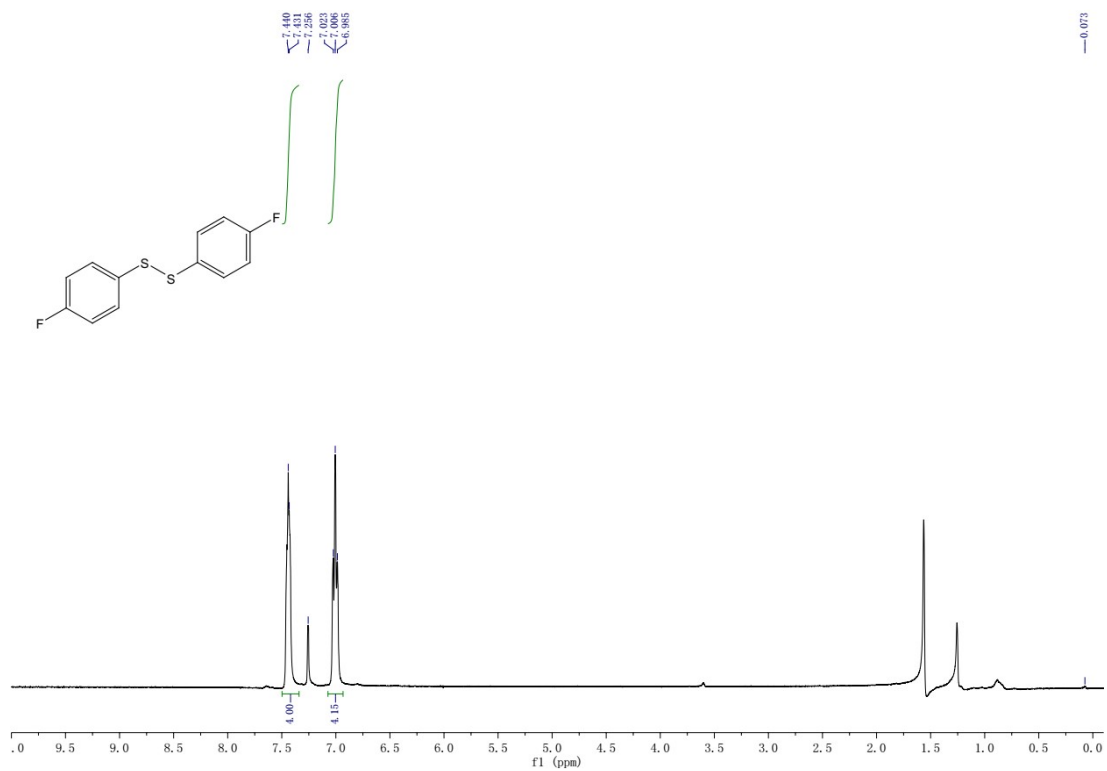

<sup>13</sup>C NMR spectrum for compound **3e** (CDCl<sub>3</sub>, 101 MHz)

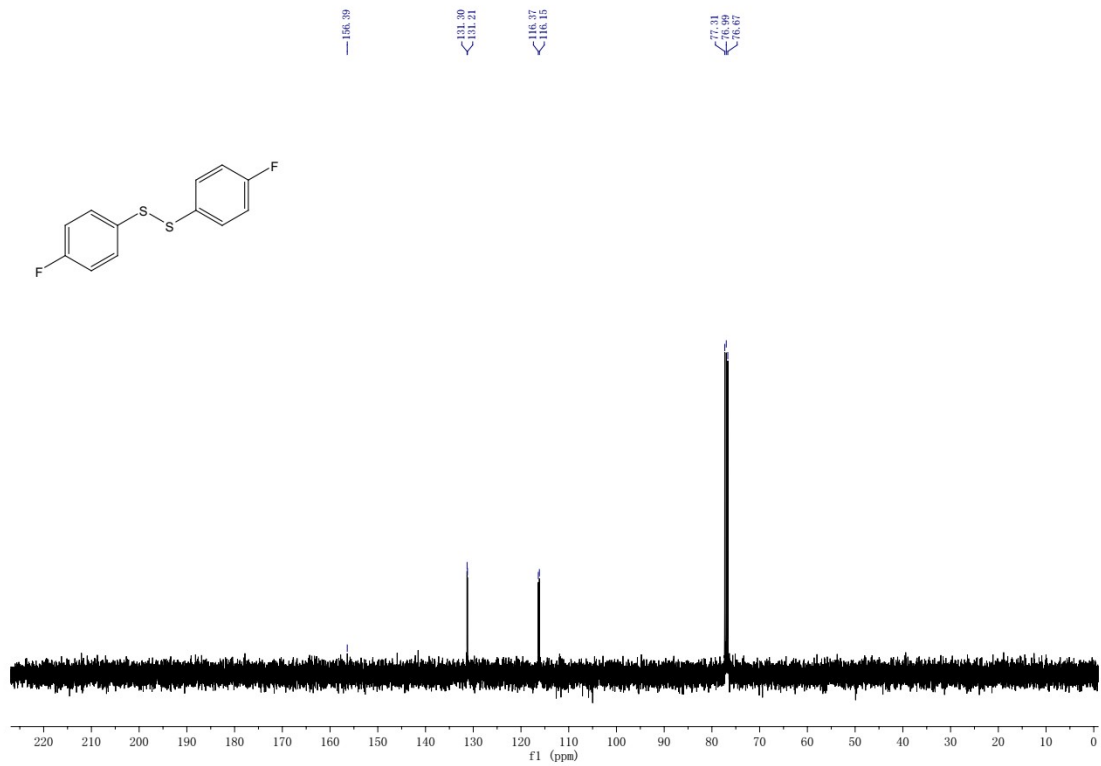

<sup>19</sup>F NMR spectrum for compound **3e** (CDCl<sub>3</sub>, 376 MHz)

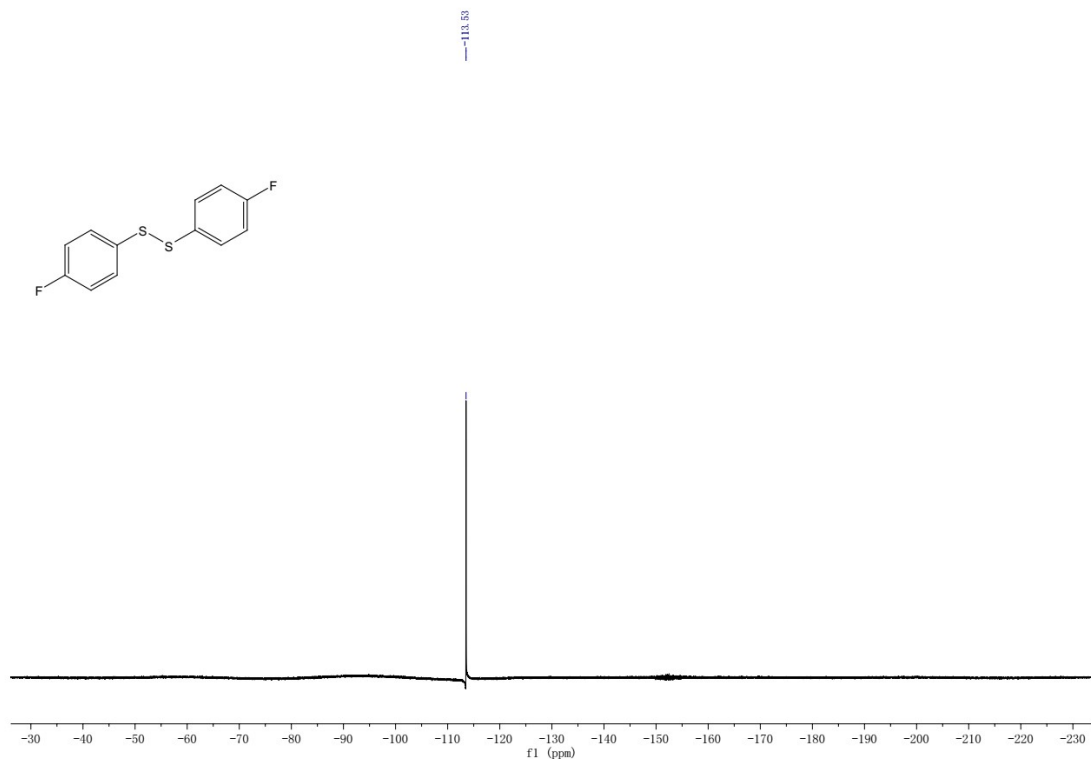

<sup>1</sup>H NMR spectrum for compound 3f (CDCl<sub>3</sub>, 400 MHz)

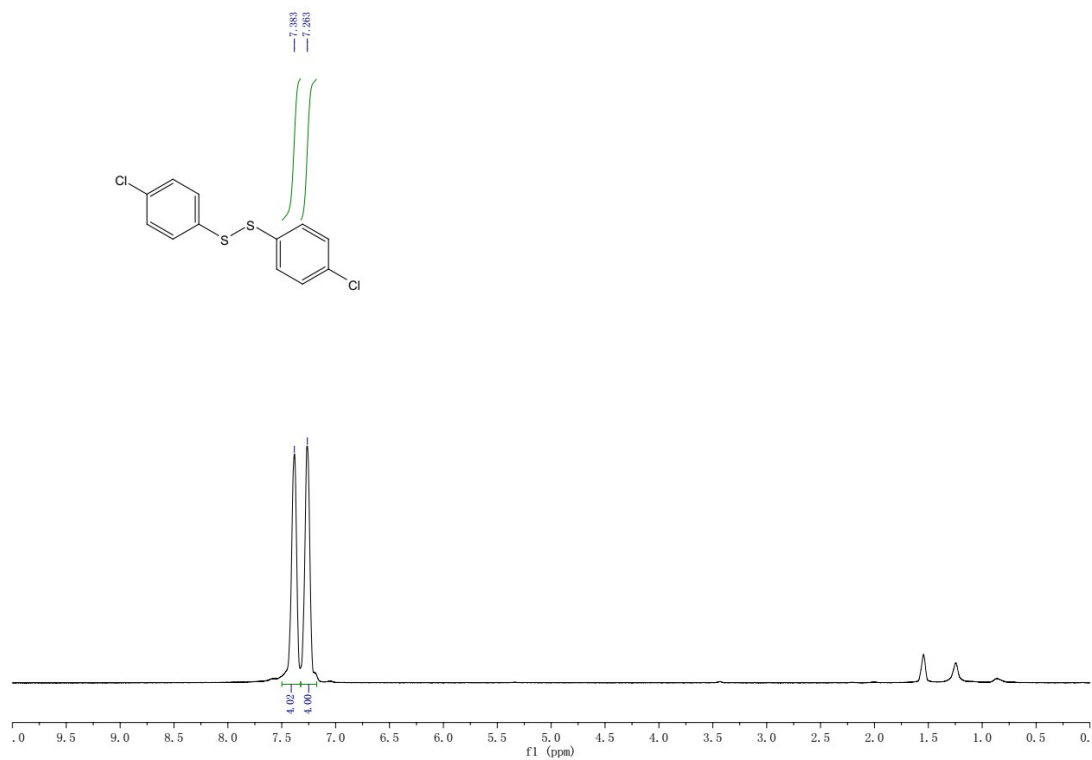

<sup>13</sup>C NMR spectrum for compound 3f (CDCl<sub>3</sub>, 101 MHz)

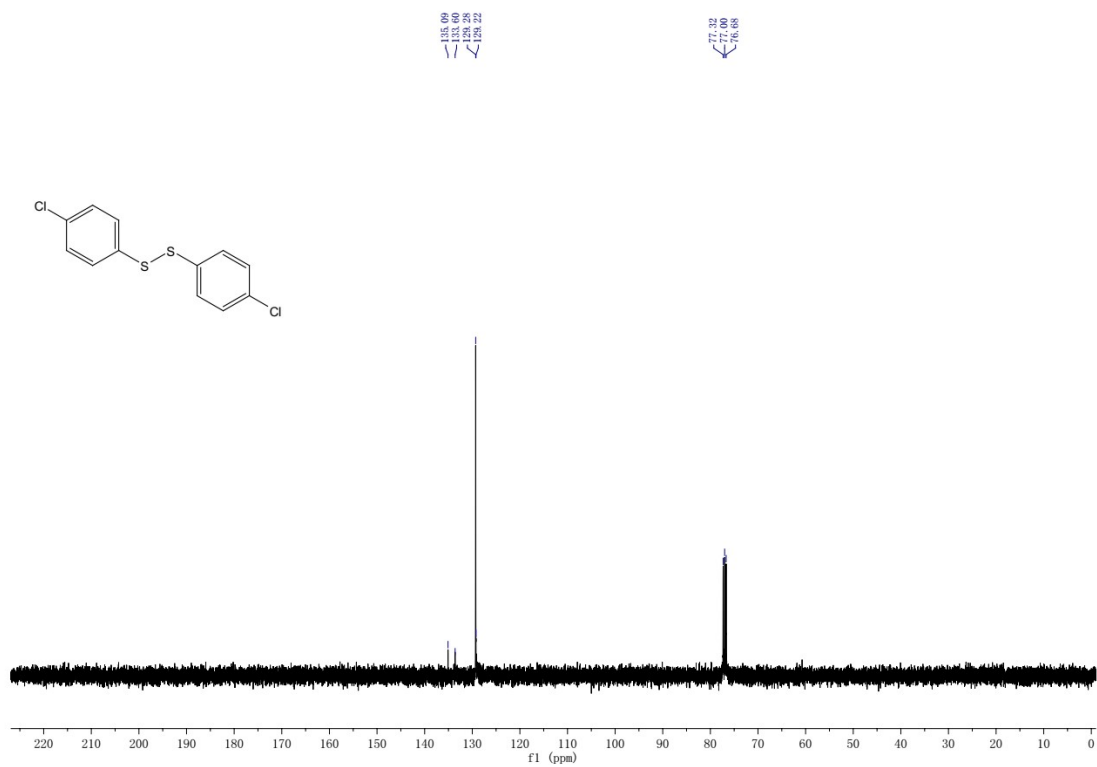

<sup>1</sup>H NMR spectrum for compound **3g** (CDCl<sub>3</sub>, 400 MHz)

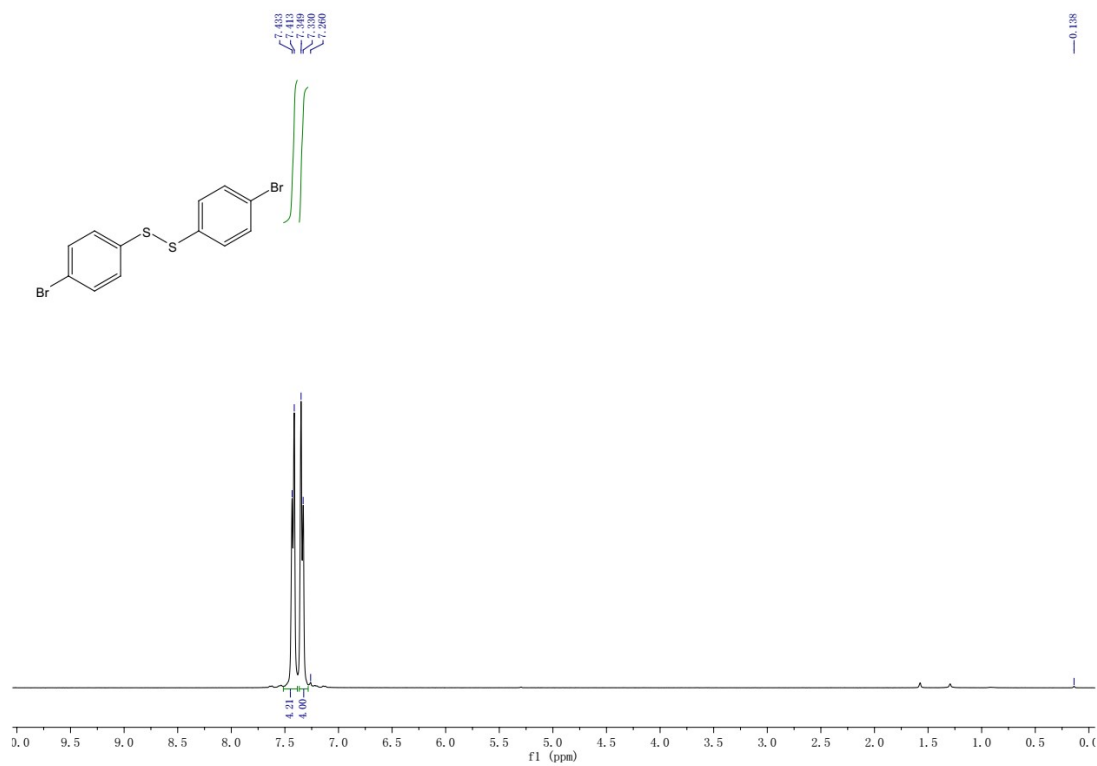

<sup>13</sup>C NMR spectrum for compound **3g** (CDCl<sub>3</sub>, 101 MHz)

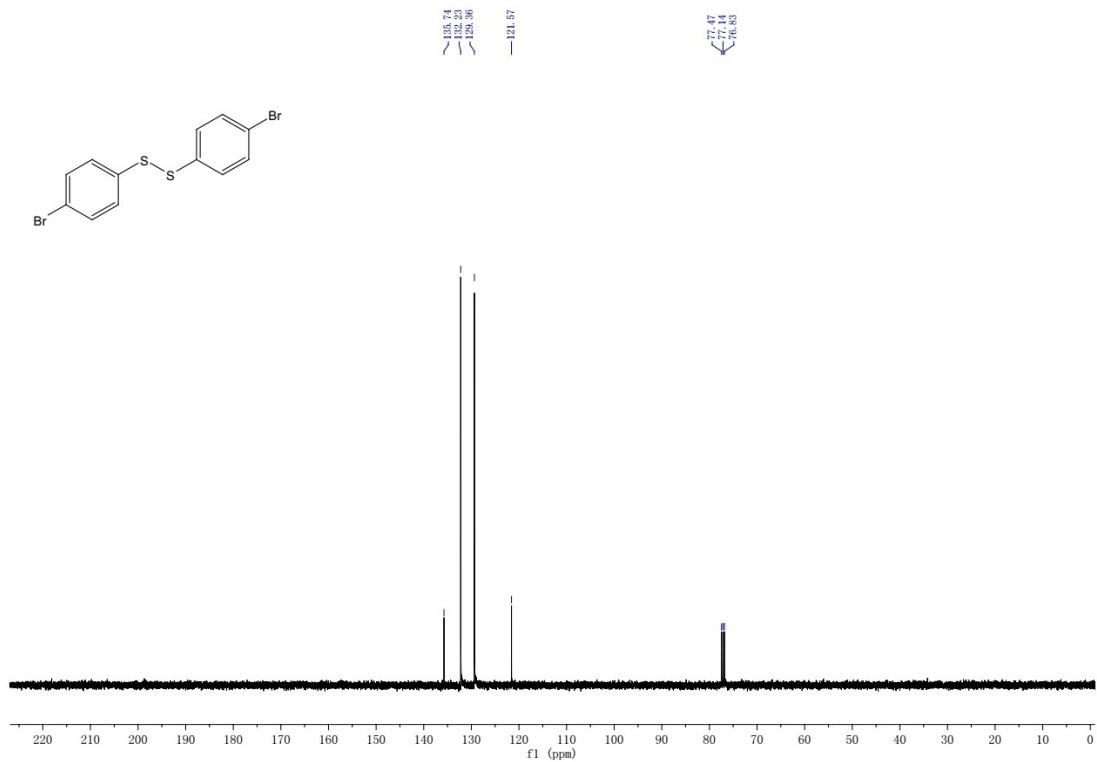

<sup>1</sup>H NMR spectrum for compound **3h** (CDCl<sub>3</sub>, 400 MHz)

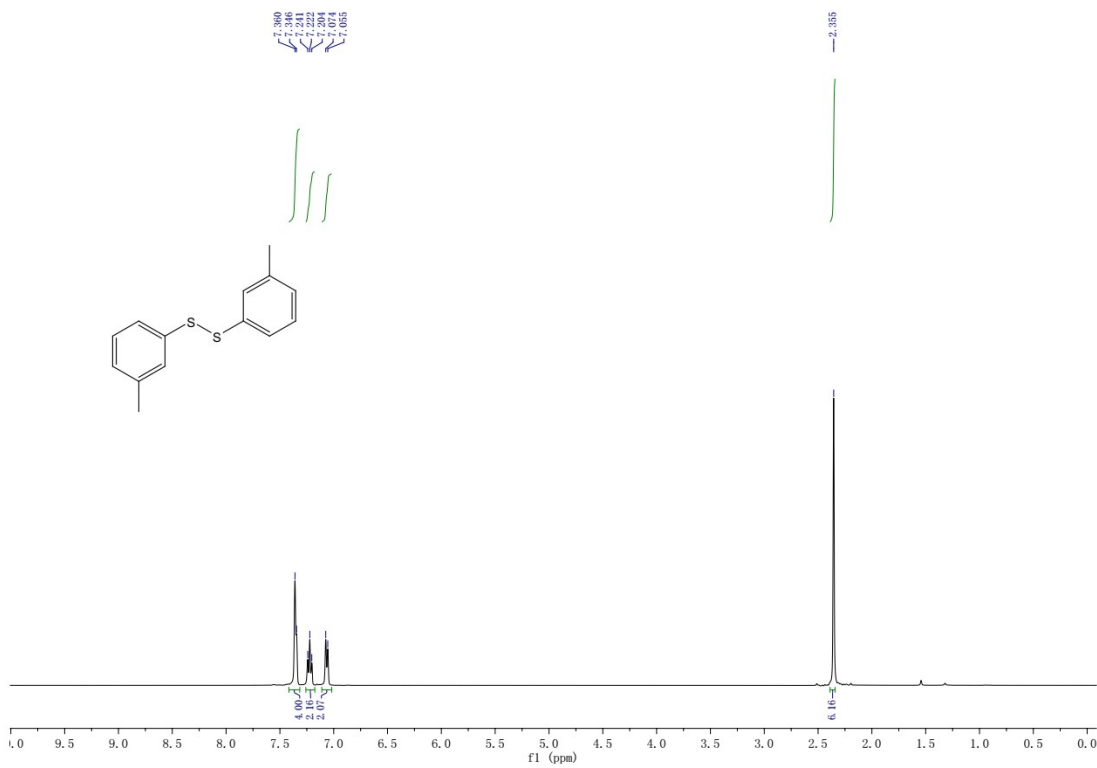

<sup>13</sup>C NMR spectrum for compound **3h** (CDCl<sub>3</sub>, 101 MHz)

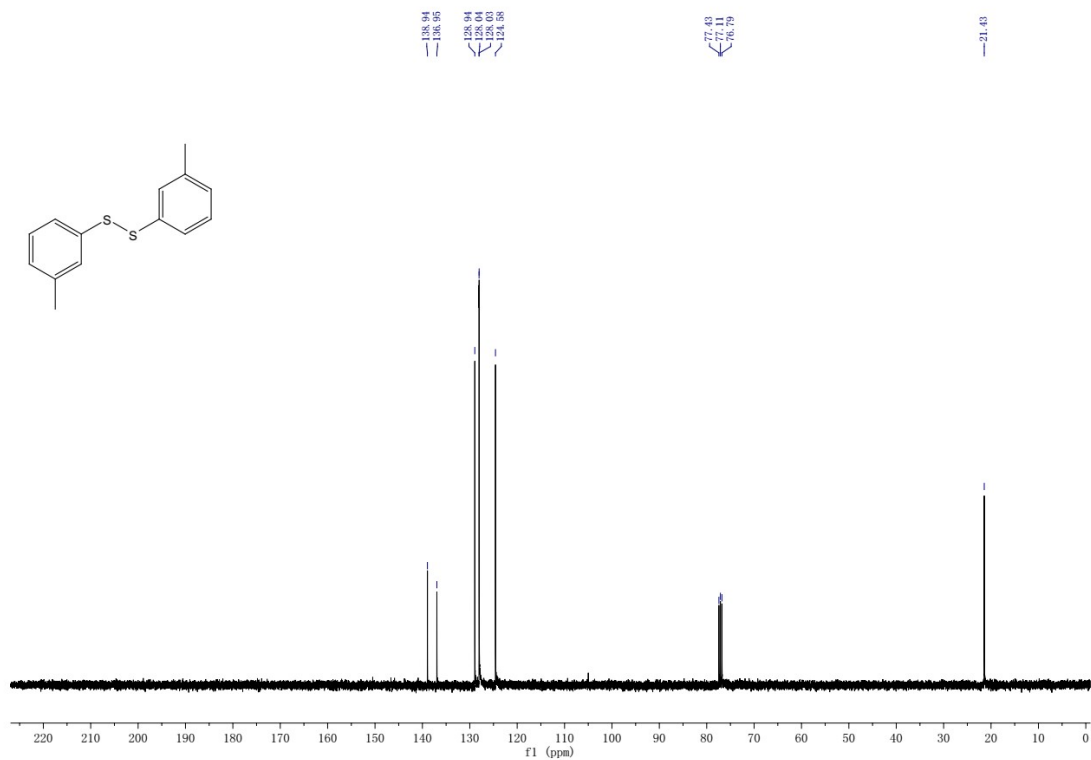

$^1\text{H}$  NMR spectrum for compound **3i** ( $\text{CDCl}_3$ , 400 MHz)

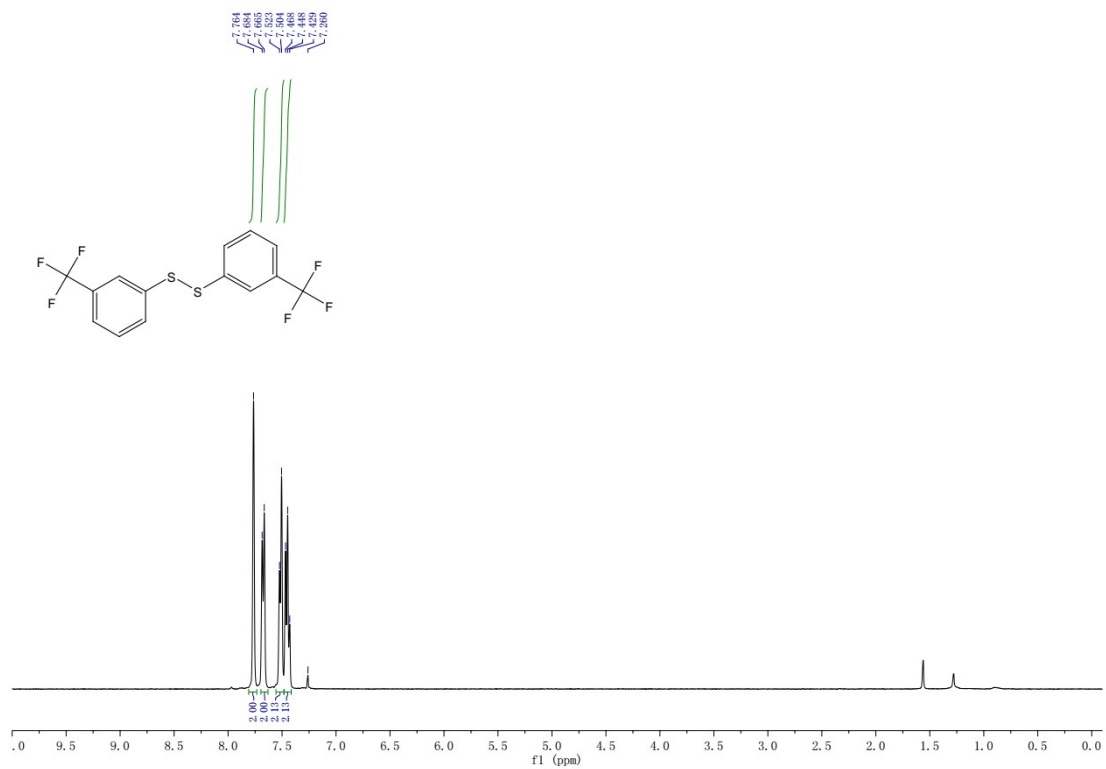

$^{13}\text{C}$  NMR spectrum for compound **3i** ( $\text{CDCl}_3$ , 101 MHz)

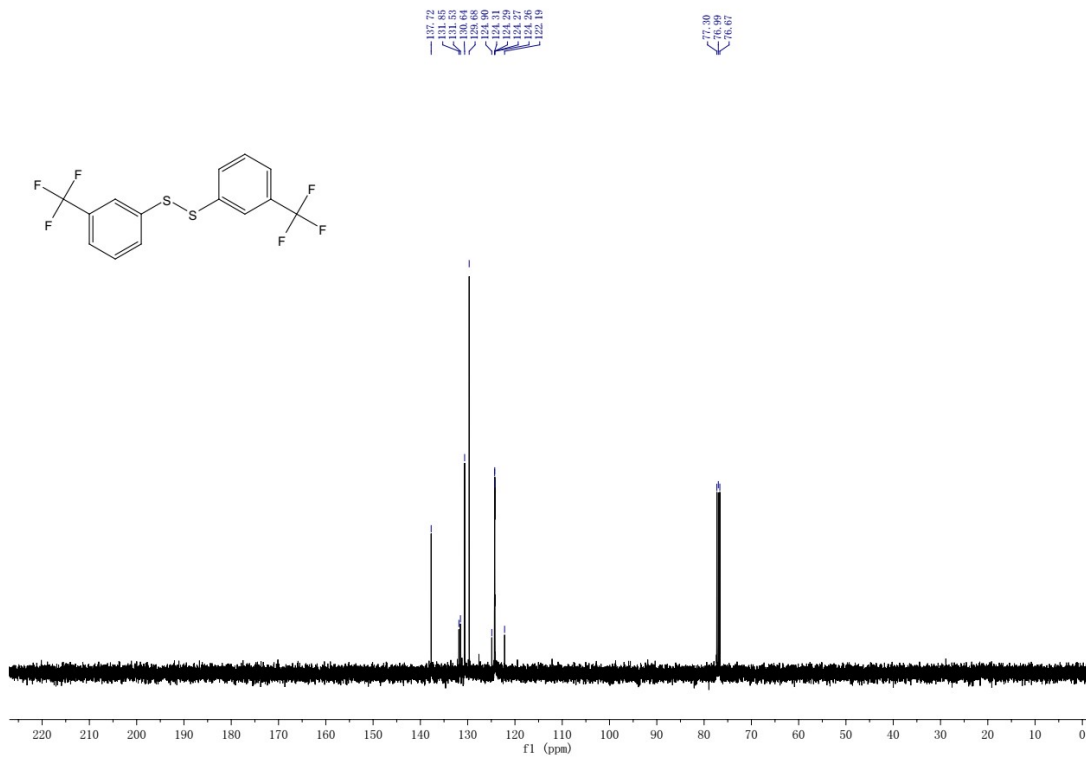

$^{19}\text{F}$  NMR spectrum for compound **3i** ( $\text{CDCl}_3$ , 376 MHz)

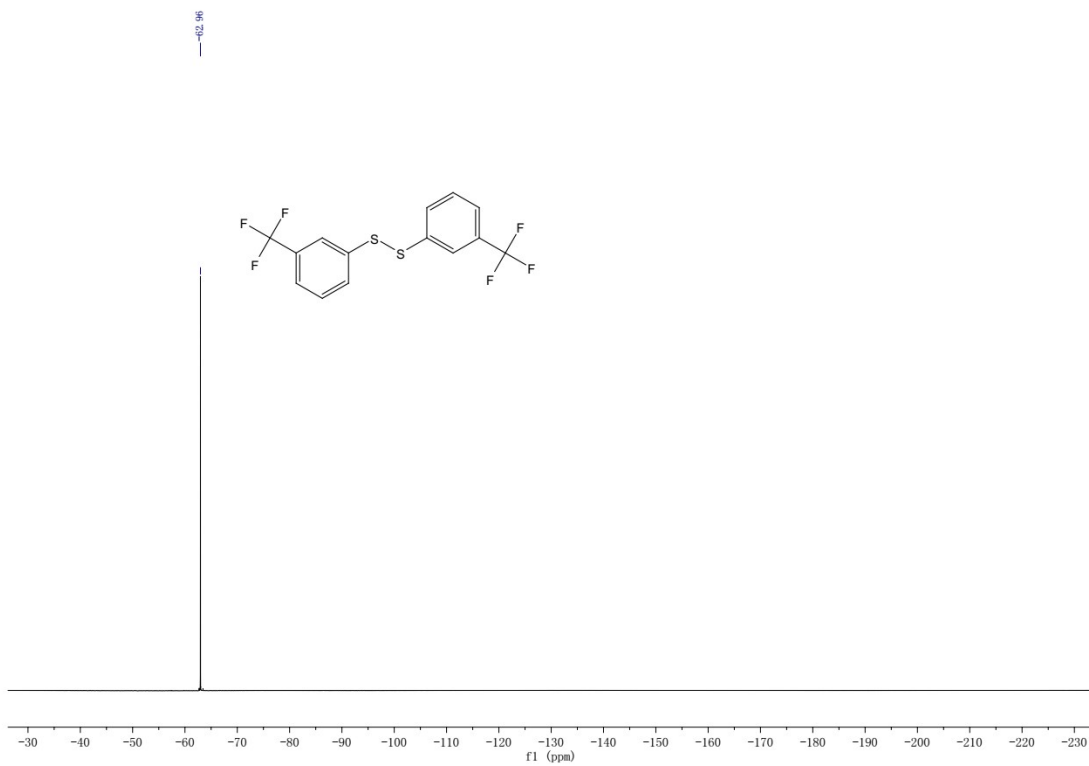

$^1\text{H}$  NMR spectrum for compound **3j** ( $\text{CDCl}_3$ , 400 MHz)

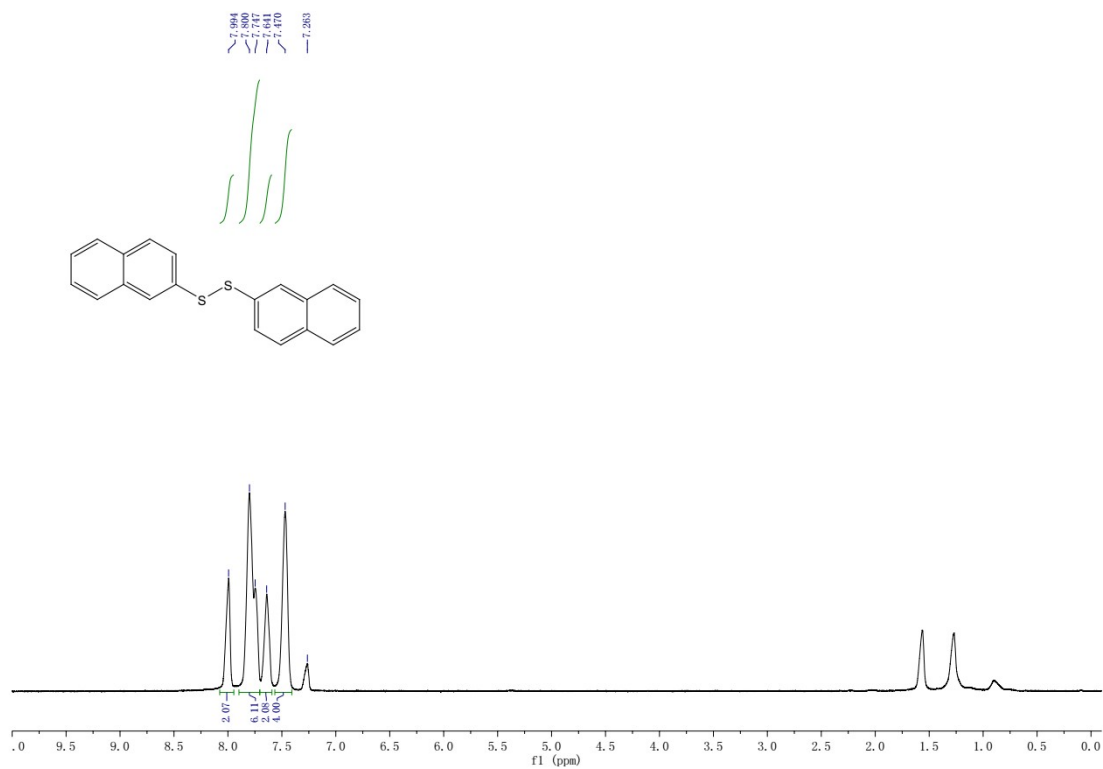

<sup>13</sup>C NMR spectrum for compound **3j** (CDCl<sub>3</sub>, 101 MHz)

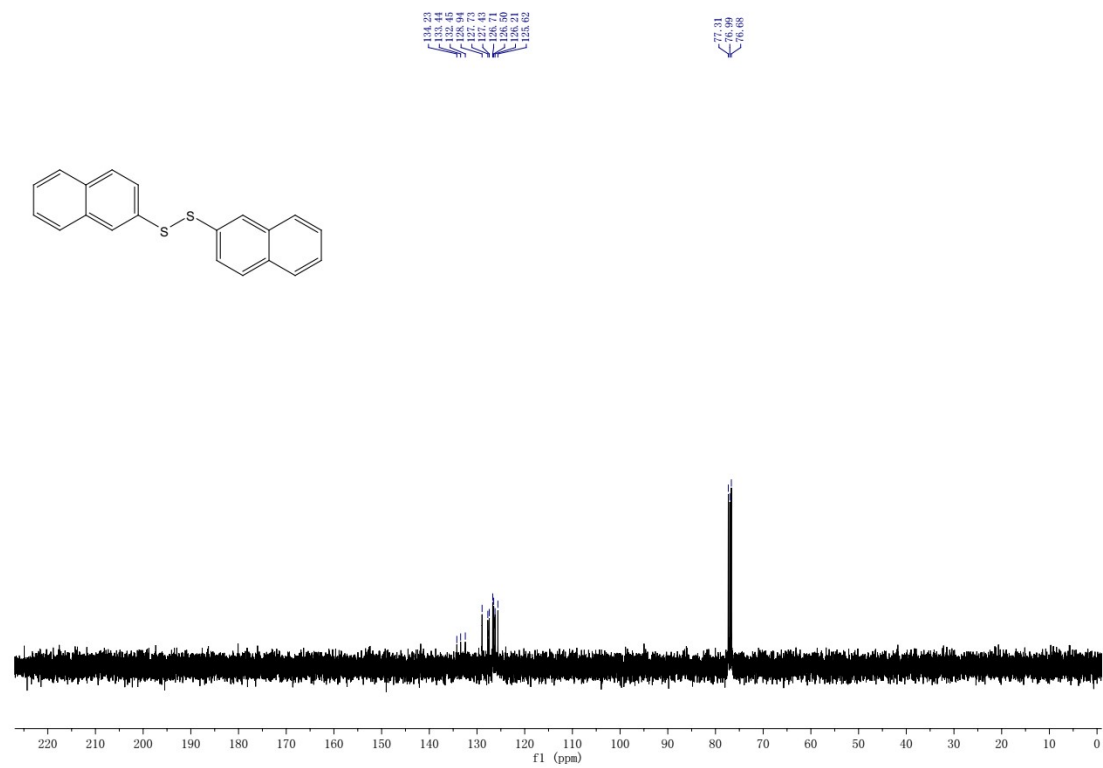

<sup>1</sup>H NMR spectrum for compound **3k** (CDCl<sub>3</sub>, 400 MHz)

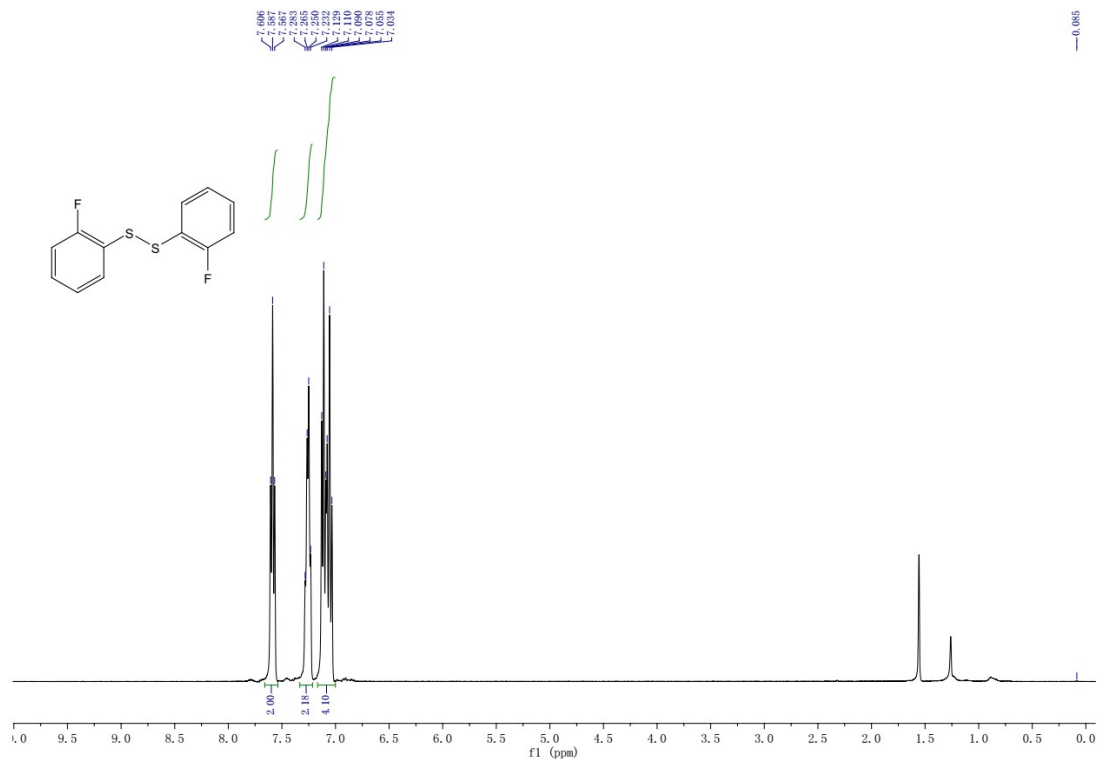

$^{13}\text{C}$  NMR spectrum for compound **3k** ( $\text{CDCl}_3$ , 101 MHz)

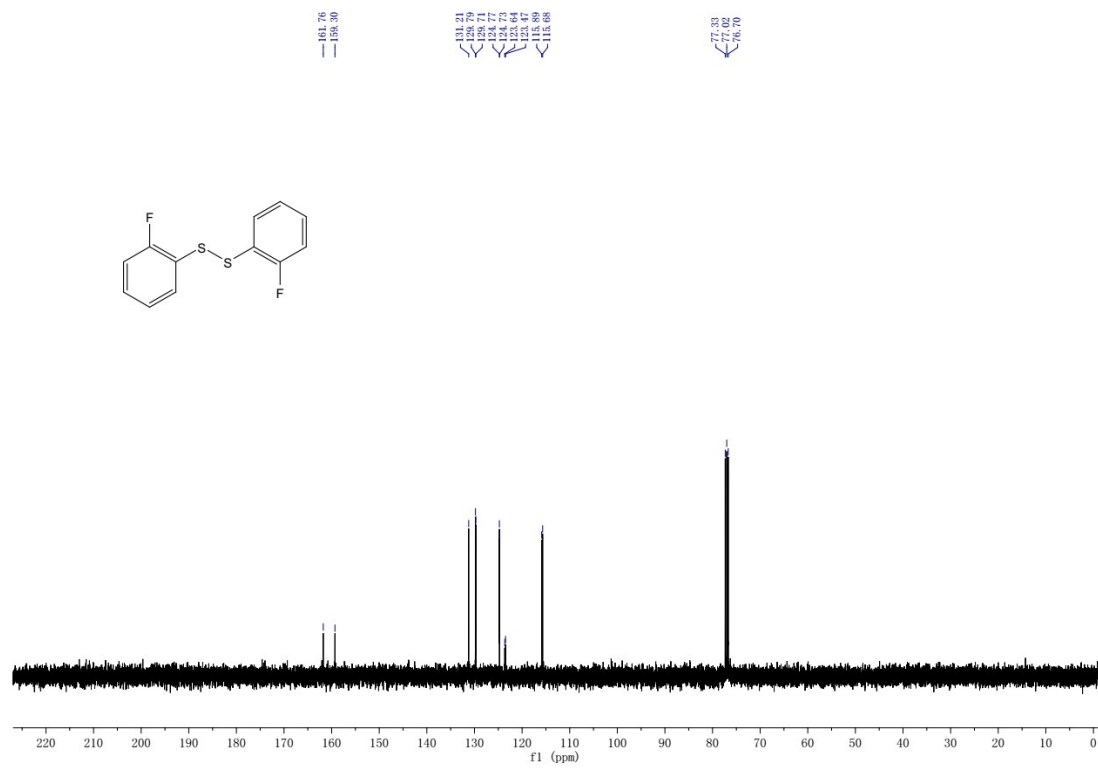

$^{19}\text{F}$  NMR spectrum for compound **3k** ( $\text{CDCl}_3$ , 376 MHz)



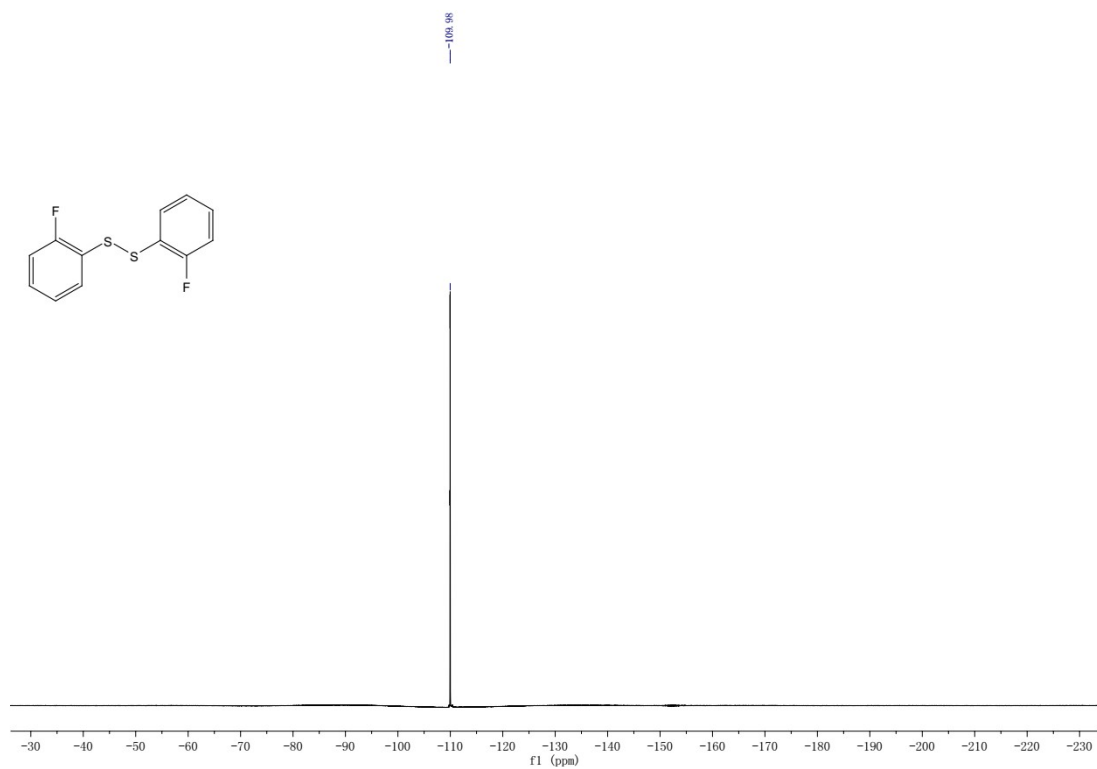

$^1\text{H}$  NMR spectrum for compound **31** ( $\text{CDCl}_3$ , 400 MHz)

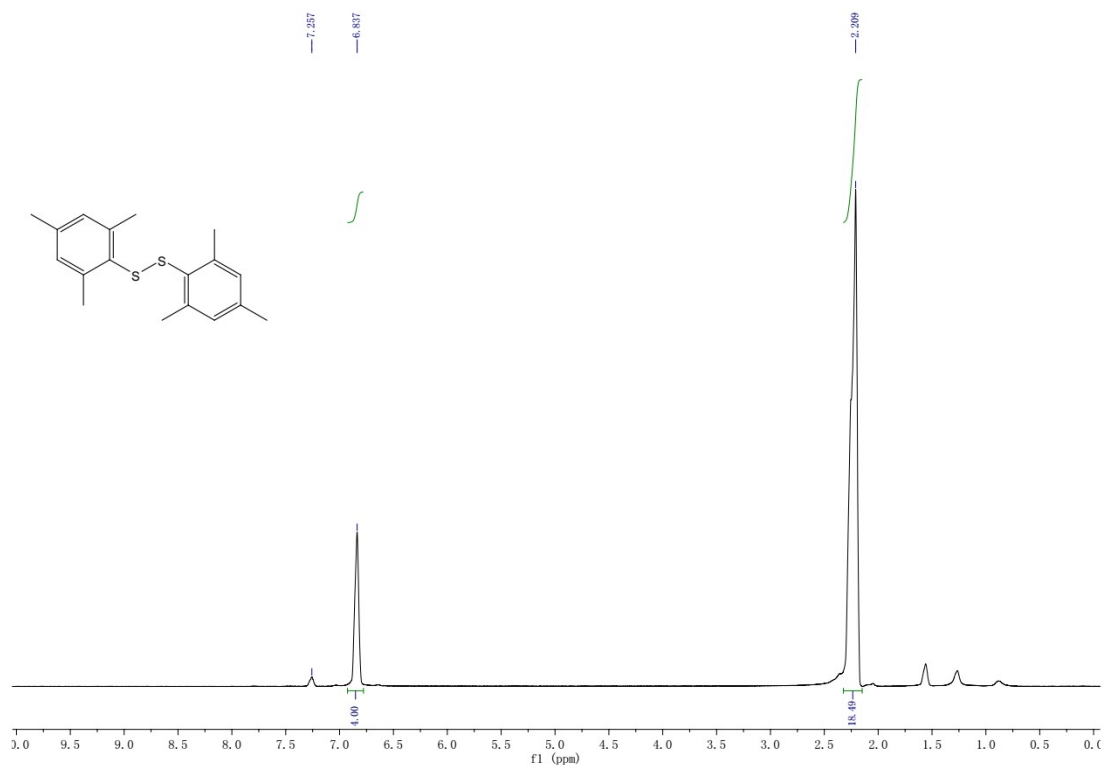

$^{13}\text{C}$  NMR spectrum for compound **31** ( $\text{CDCl}_3$ , 101 MHz)

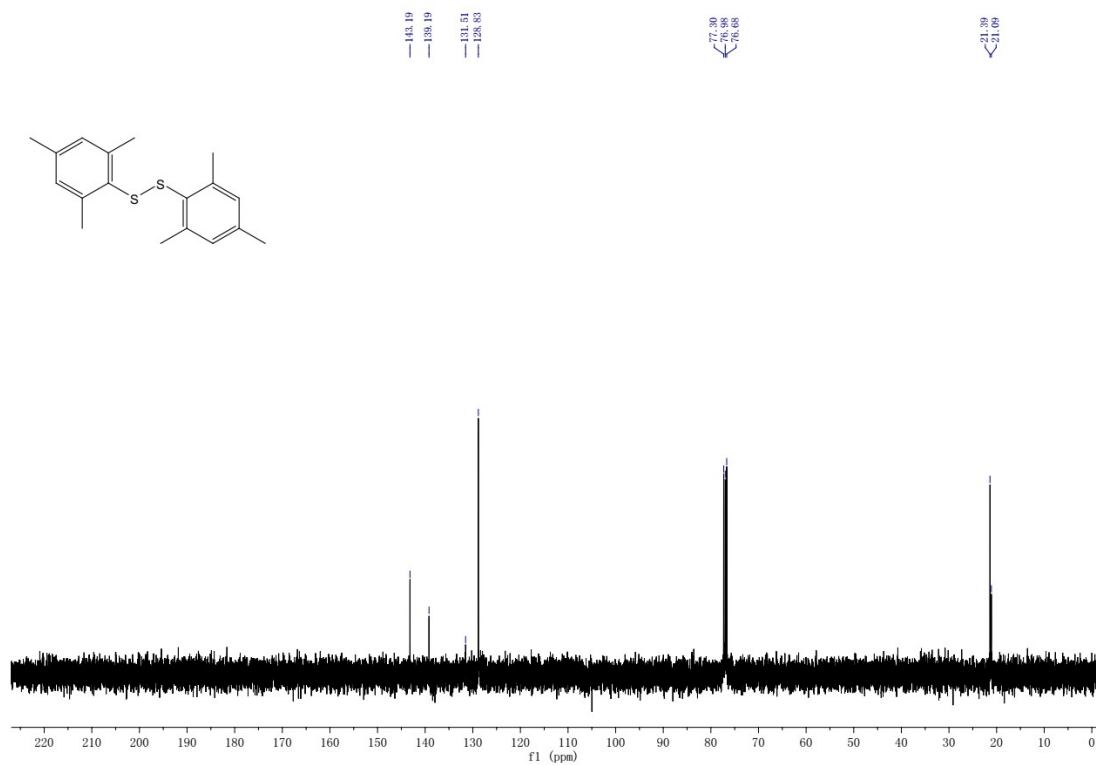

<sup>1</sup>H NMR spectrum for compound **3m** (CDCl<sub>3</sub>, 400 MHz)

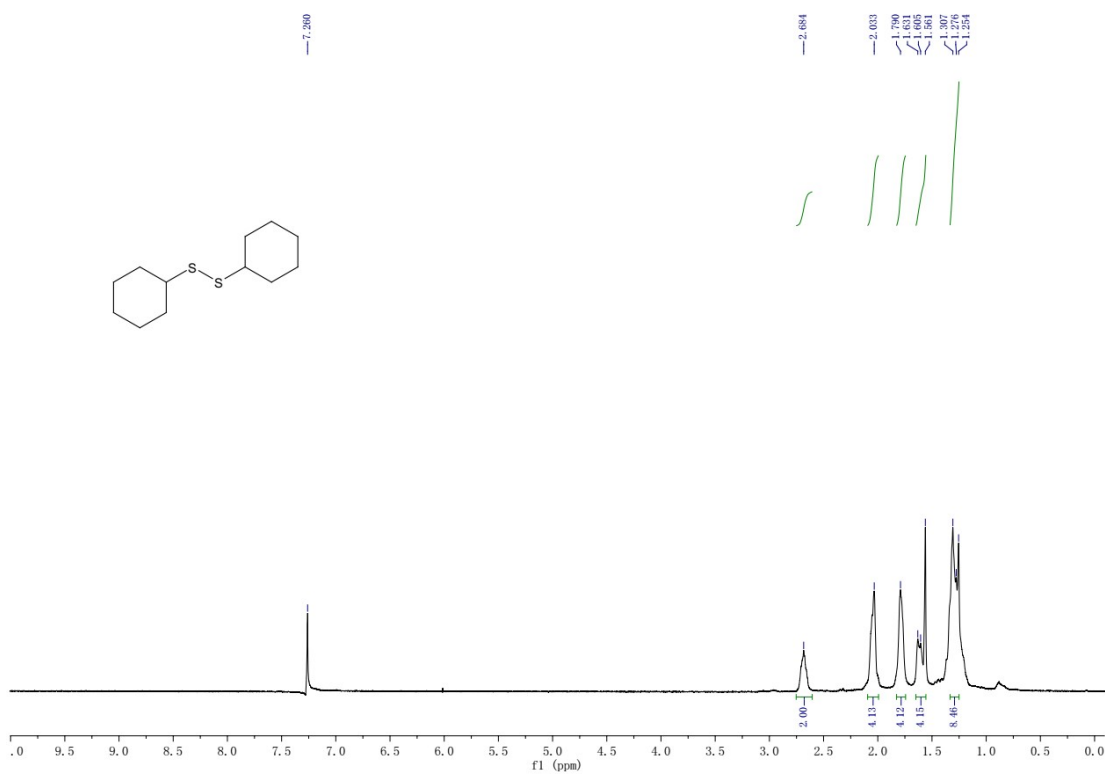

<sup>1</sup>H NMR spectrum for compound **3n** (CDCl<sub>3</sub>, 400 MHz)

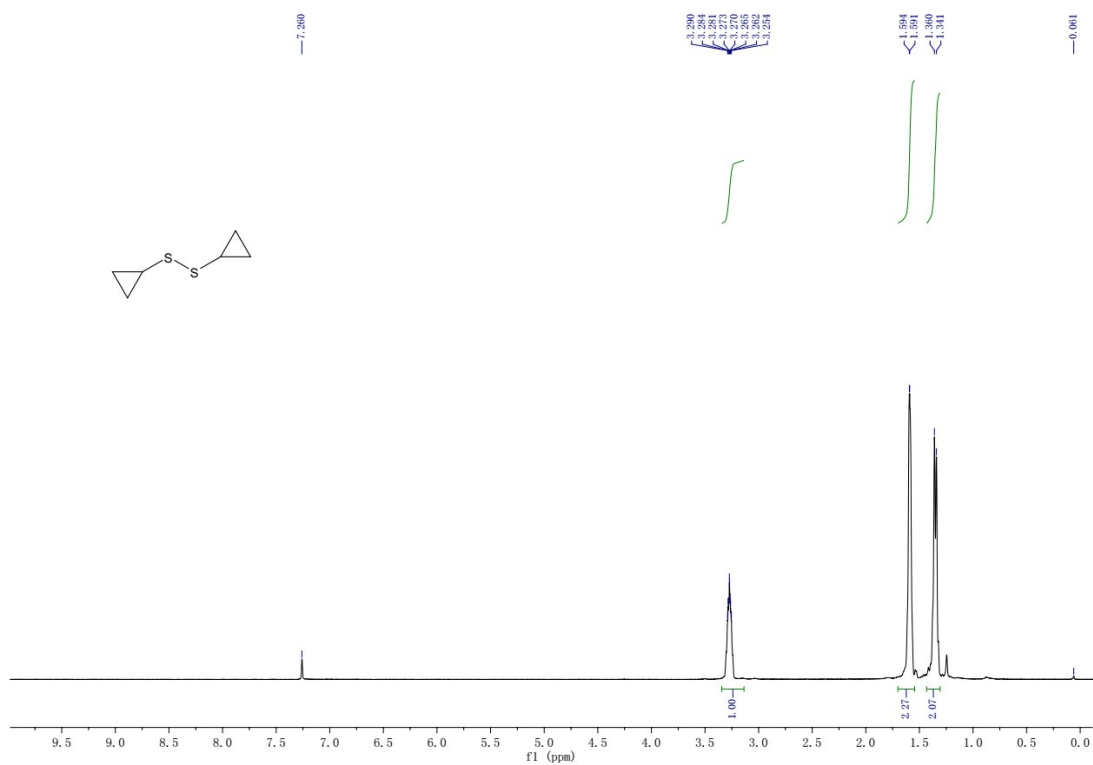

$^{13}\text{C}$  NMR spectrum for compound **3n** ( $\text{CDCl}_3$ , 101 MHz)

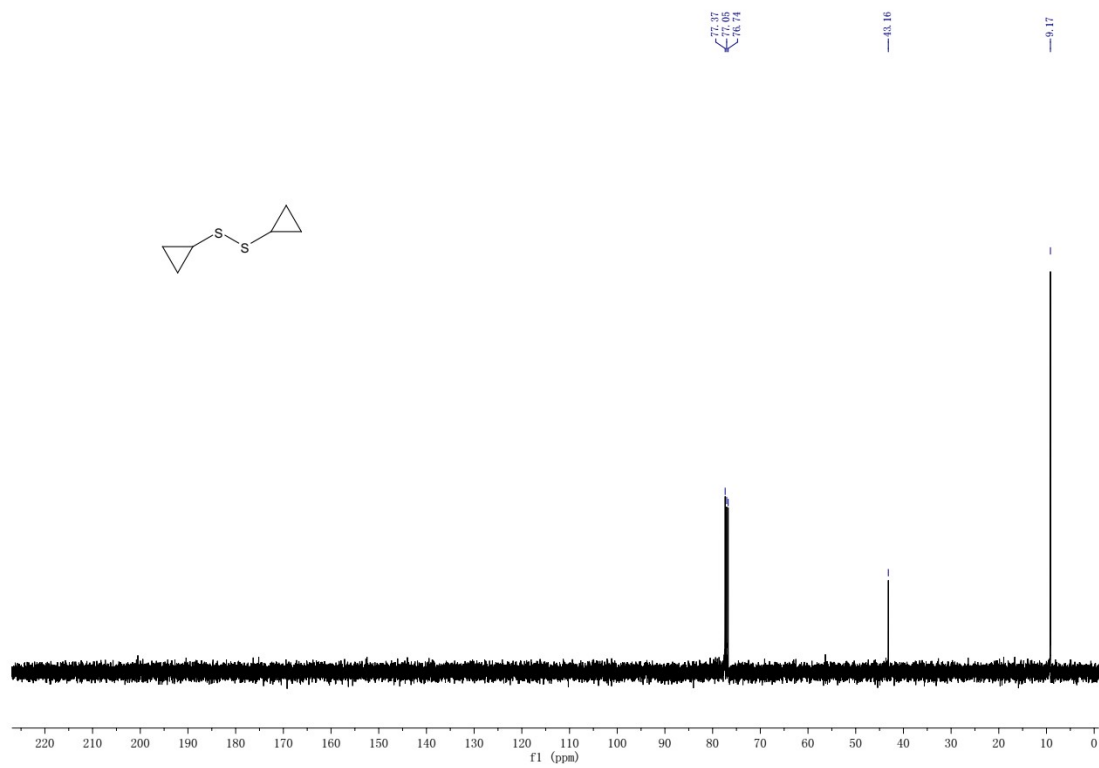

$^1\text{H}$  NMR spectrum for compound **3o** ( $\text{CDCl}_3$ , 400 MHz)

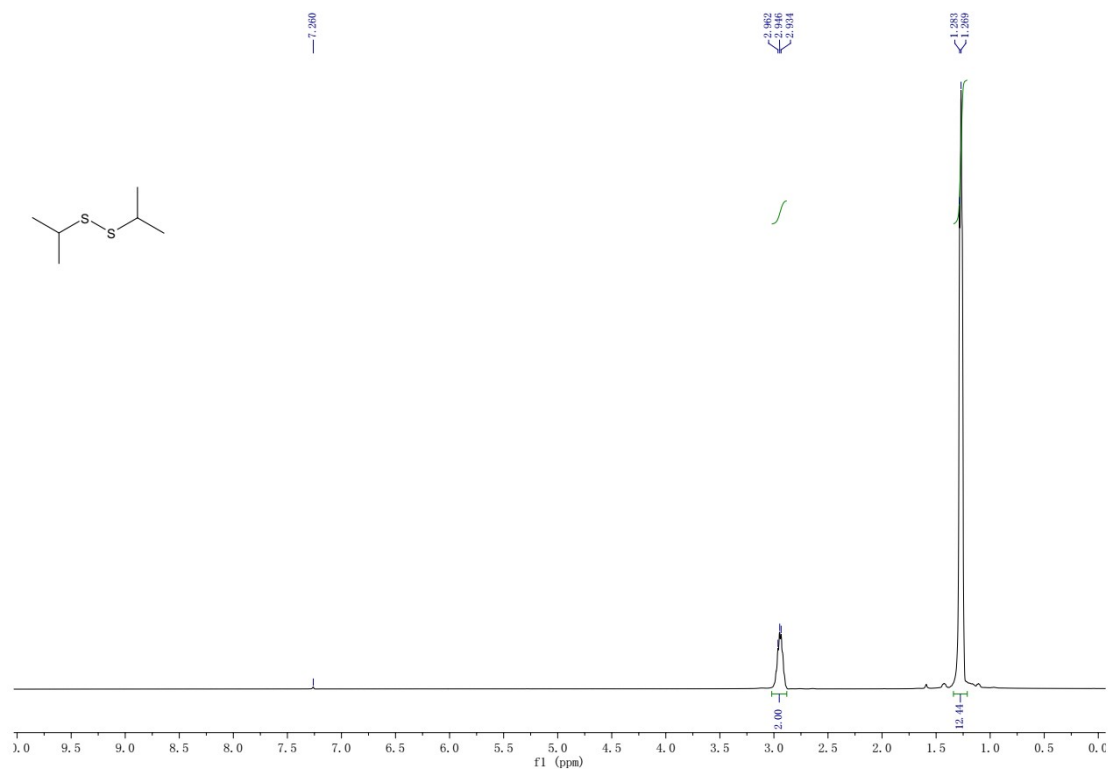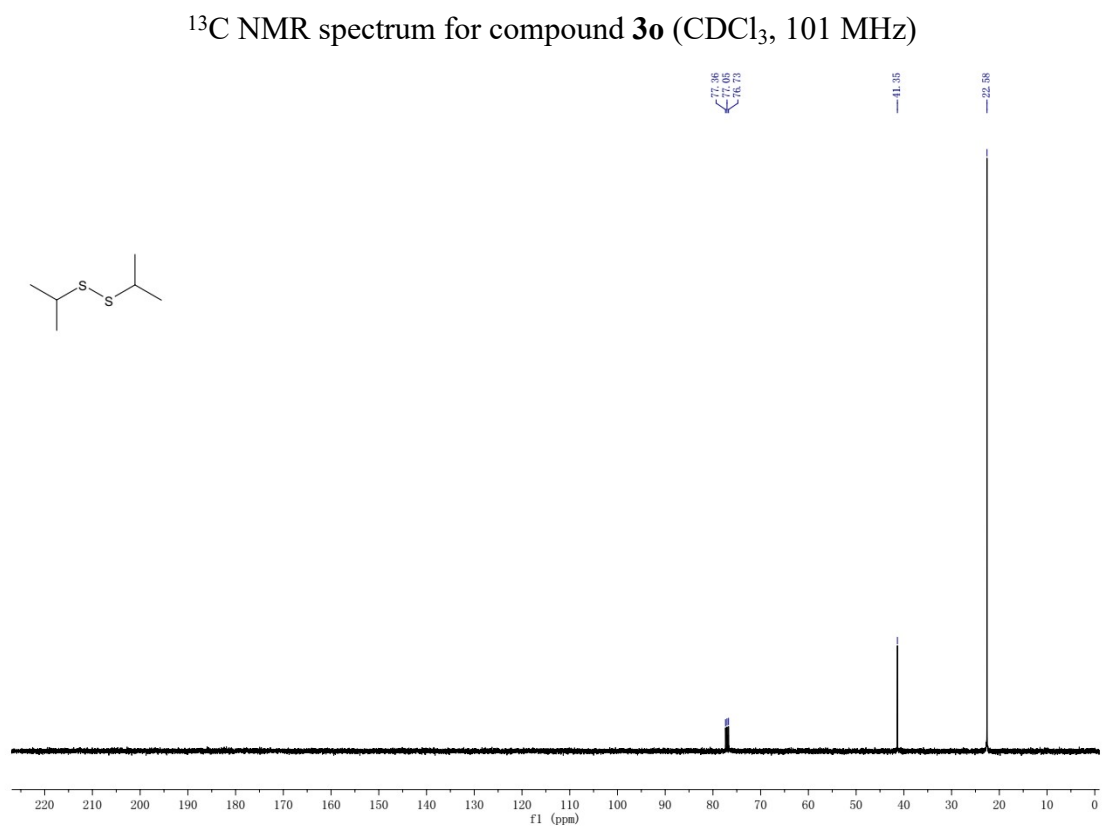

<sup>1</sup>H NMR spectrum for compound **3p** (D<sub>6</sub>-DMSO, 400 MHz)

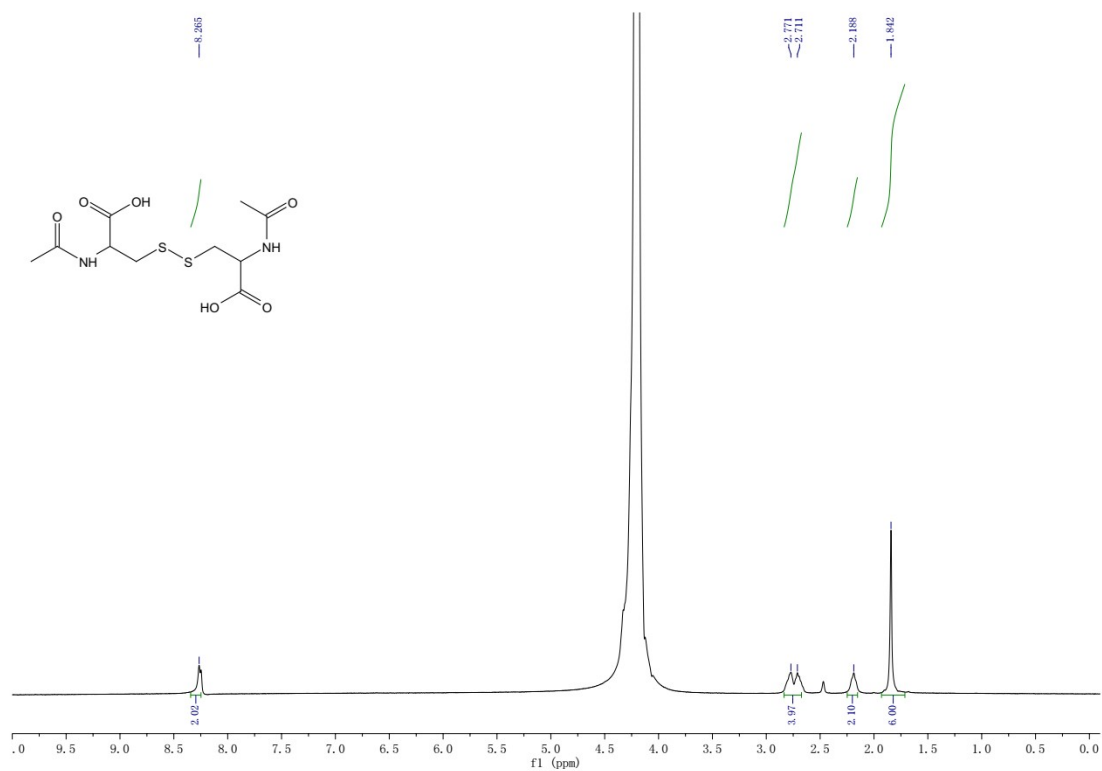

<sup>13</sup>C NMR spectrum for compound **3p** (D<sub>6</sub>-DMSO, 101 MHz)

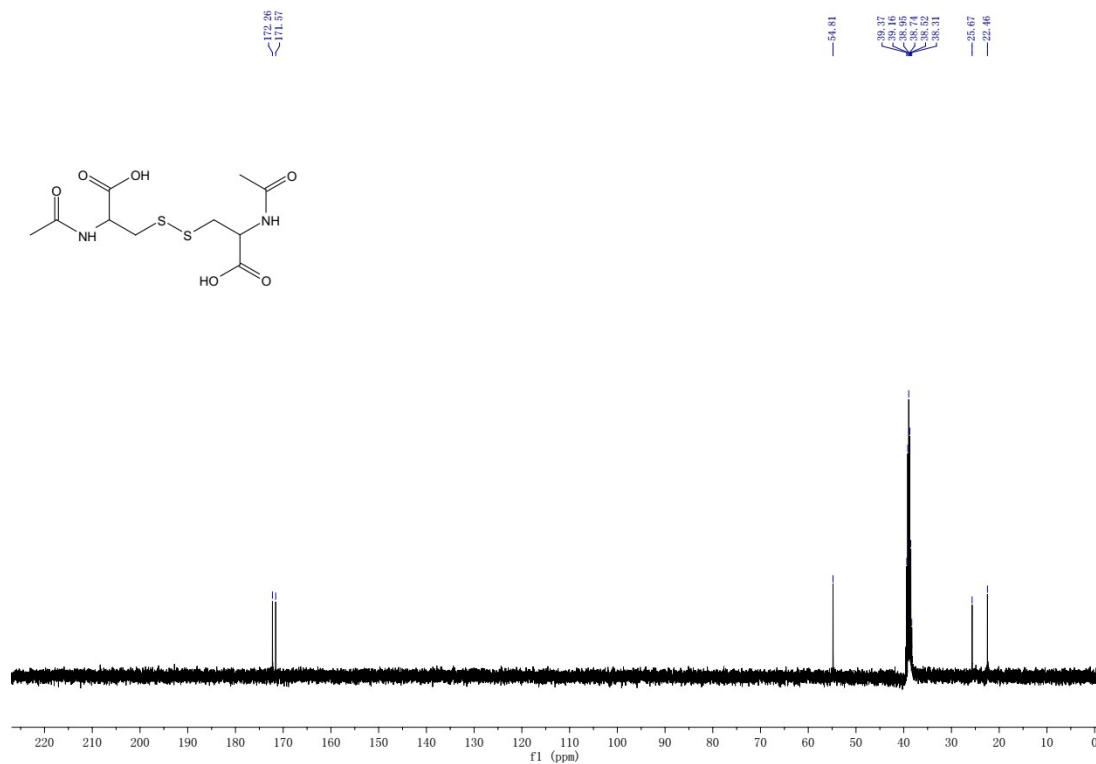

<sup>1</sup>H NMR spectrum for compound **3q** (CDCl<sub>3</sub>, 400 MHz)

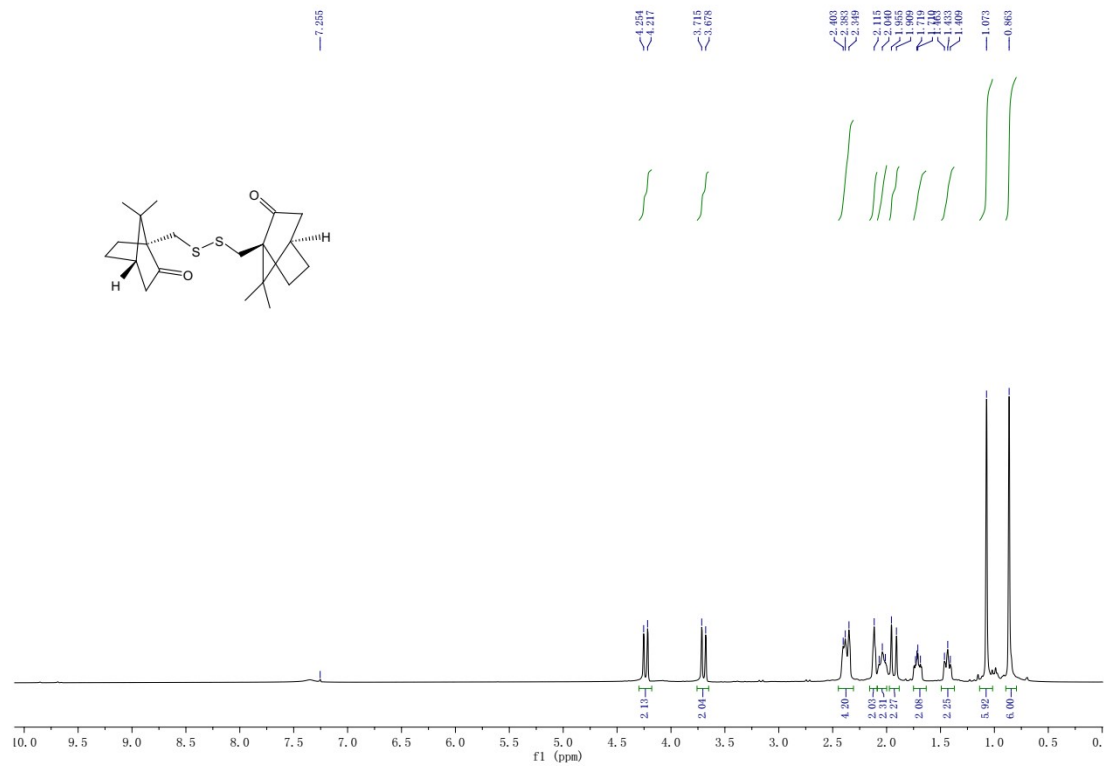

<sup>13</sup>C NMR spectrum for compound **3q** (CDCl<sub>3</sub>, 101 MHz)

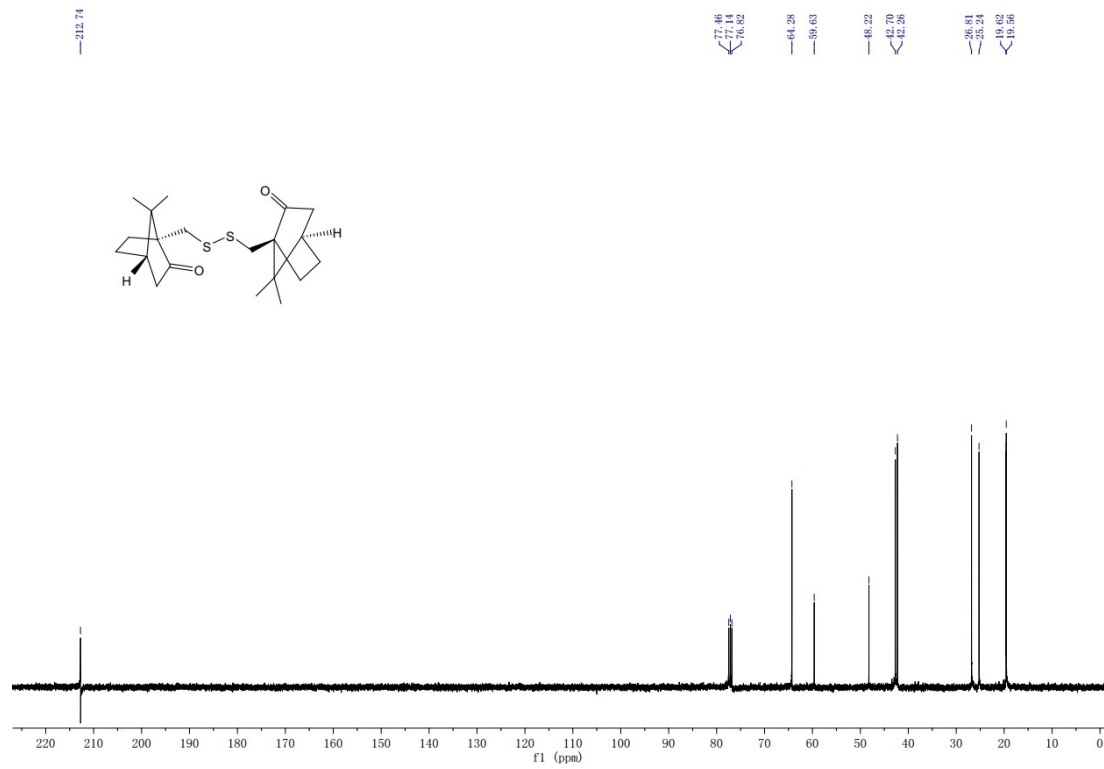

<sup>1</sup>H NMR spectrum for compound **3r** (CDCl<sub>3</sub>, 400 MHz)

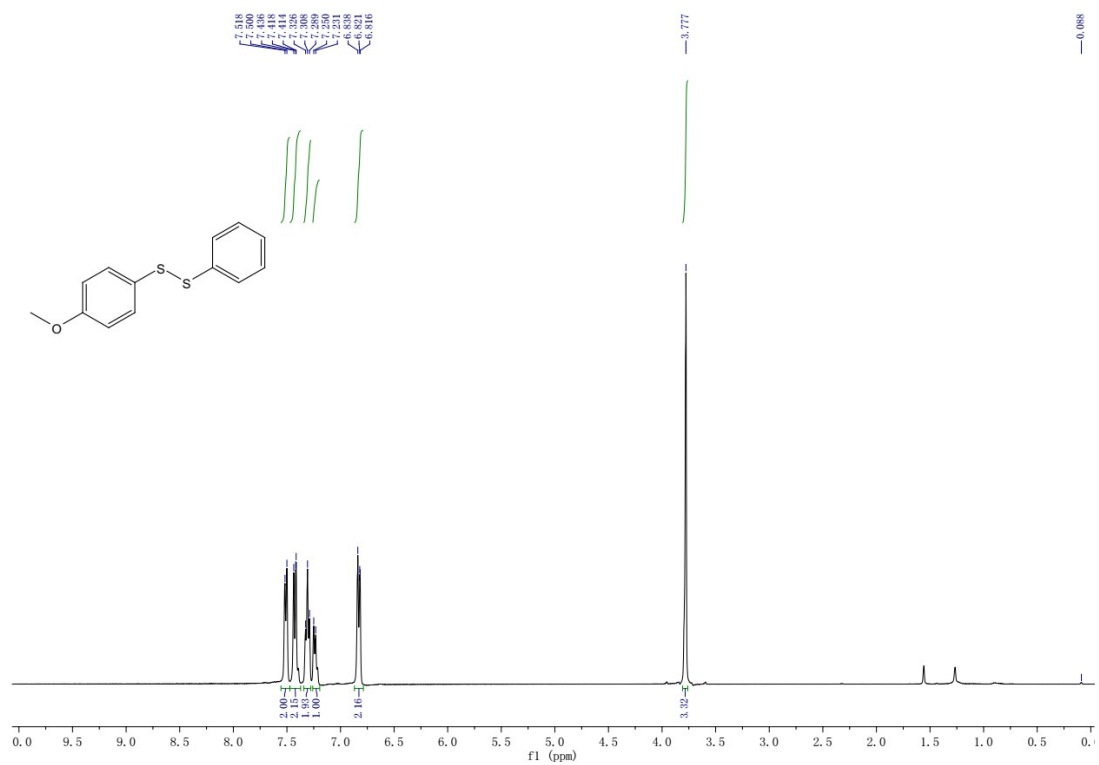

<sup>13</sup>C NMR spectrum for compound **3r** (CDCl<sub>3</sub>, 101 MHz)

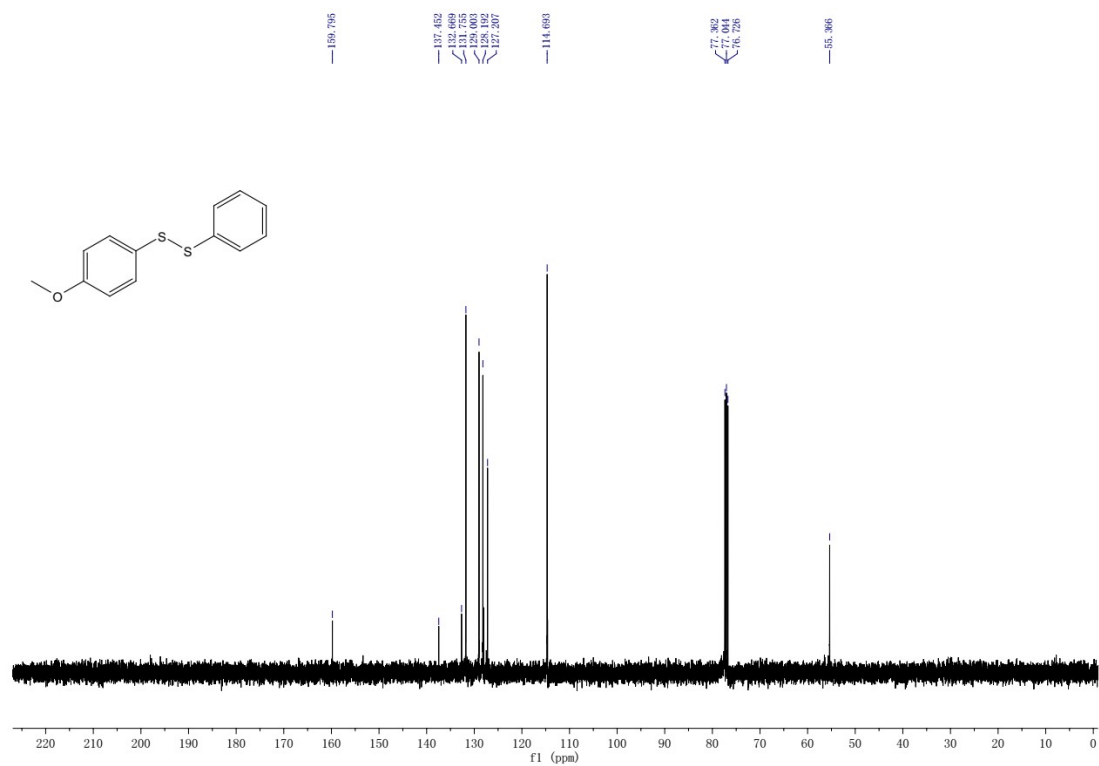

<sup>1</sup>H NMR spectrum for compound **3s** (CDCl<sub>3</sub>, 400 MHz)

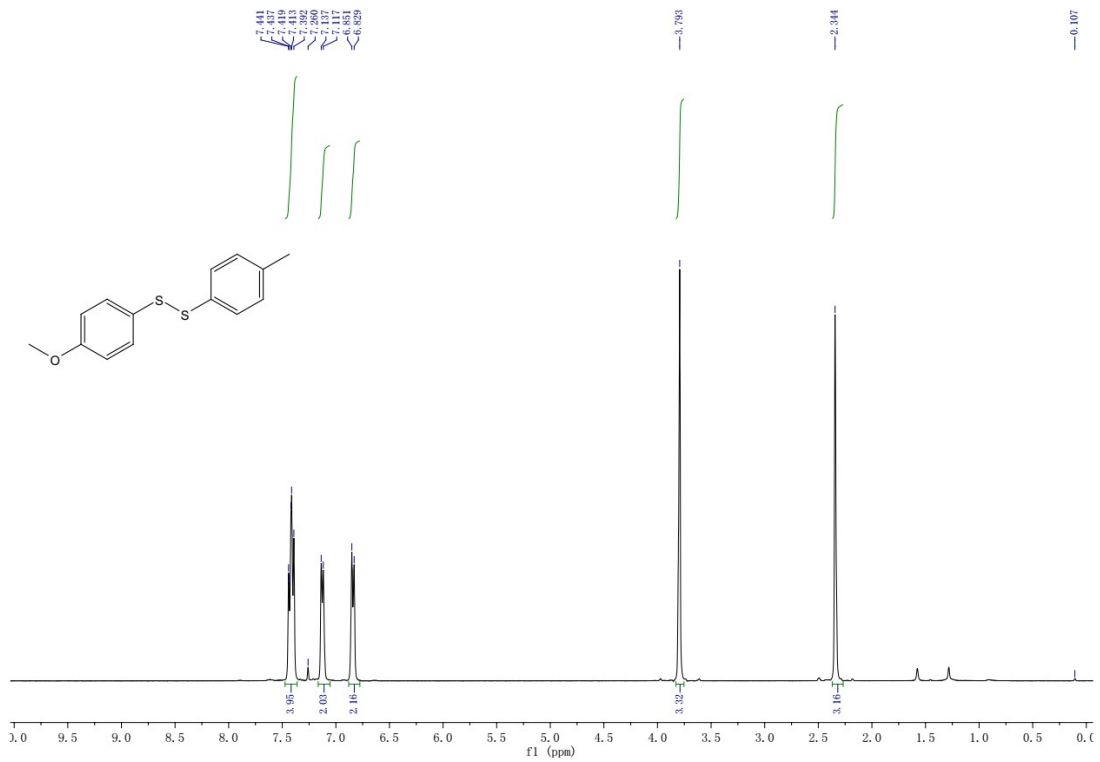

$^{13}\text{C}$  NMR spectrum for compound **3s** ( $\text{CDCl}_3$ , 101 MHz)

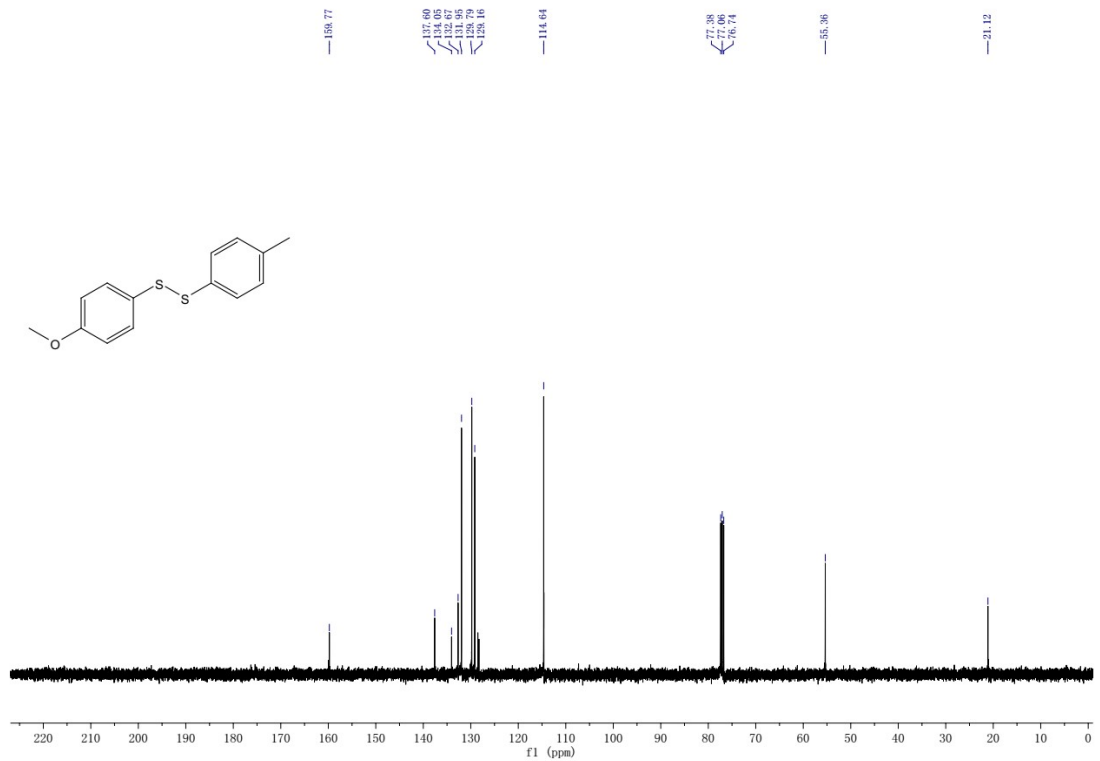

$^1\text{H}$  NMR spectrum for compound **3t** ( $\text{CDCl}_3$ , 400 MHz)



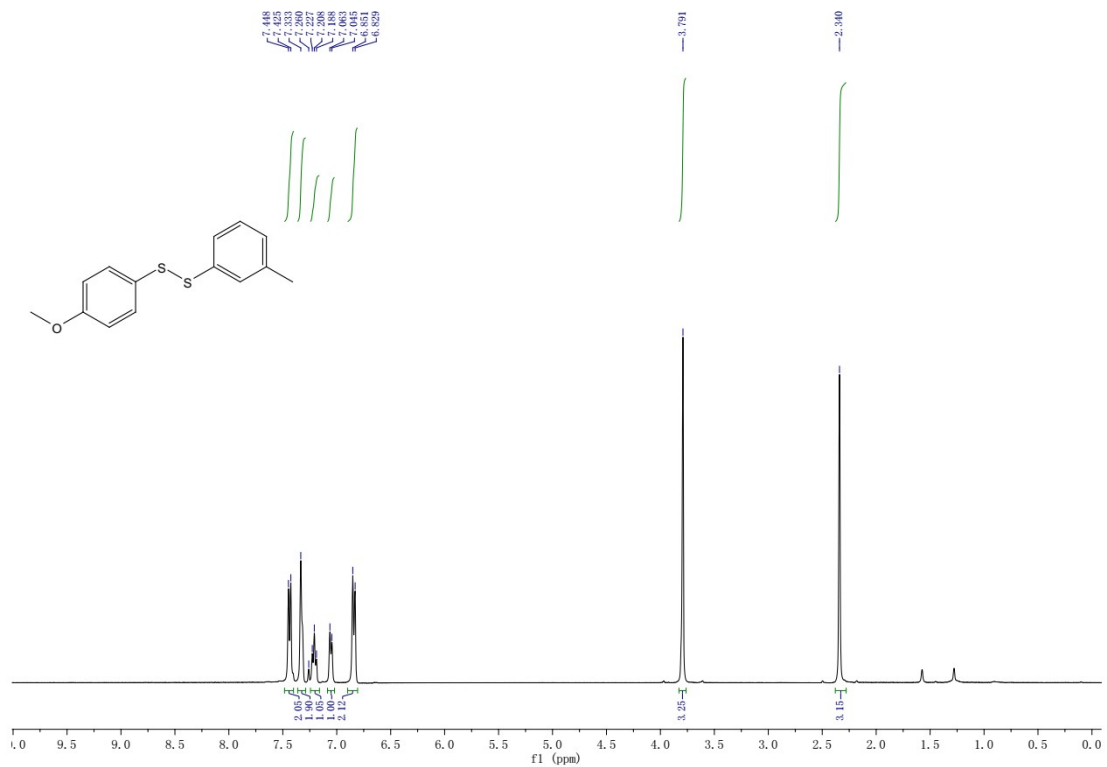

**<sup>13</sup>C NMR spectrum for compound 3t (CDCl<sub>3</sub>, 101 MHz)**

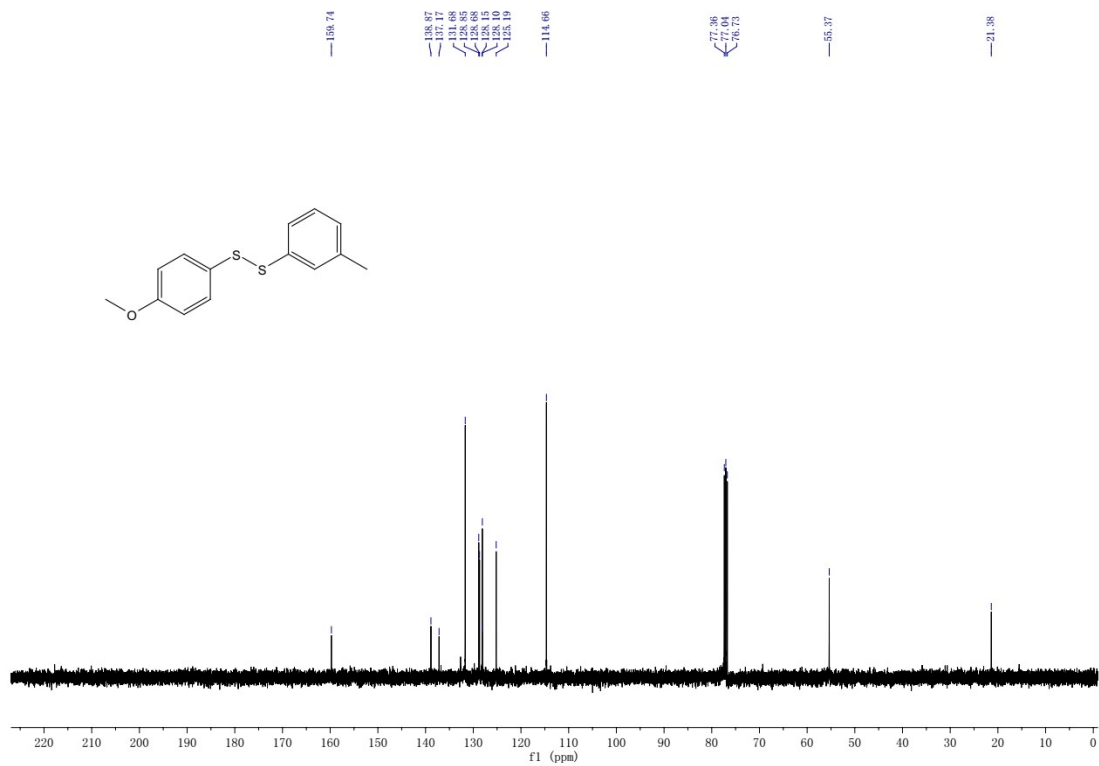

**<sup>1</sup>H NMR spectrum for compound 3u (CDCl<sub>3</sub>, 400 MHz)**

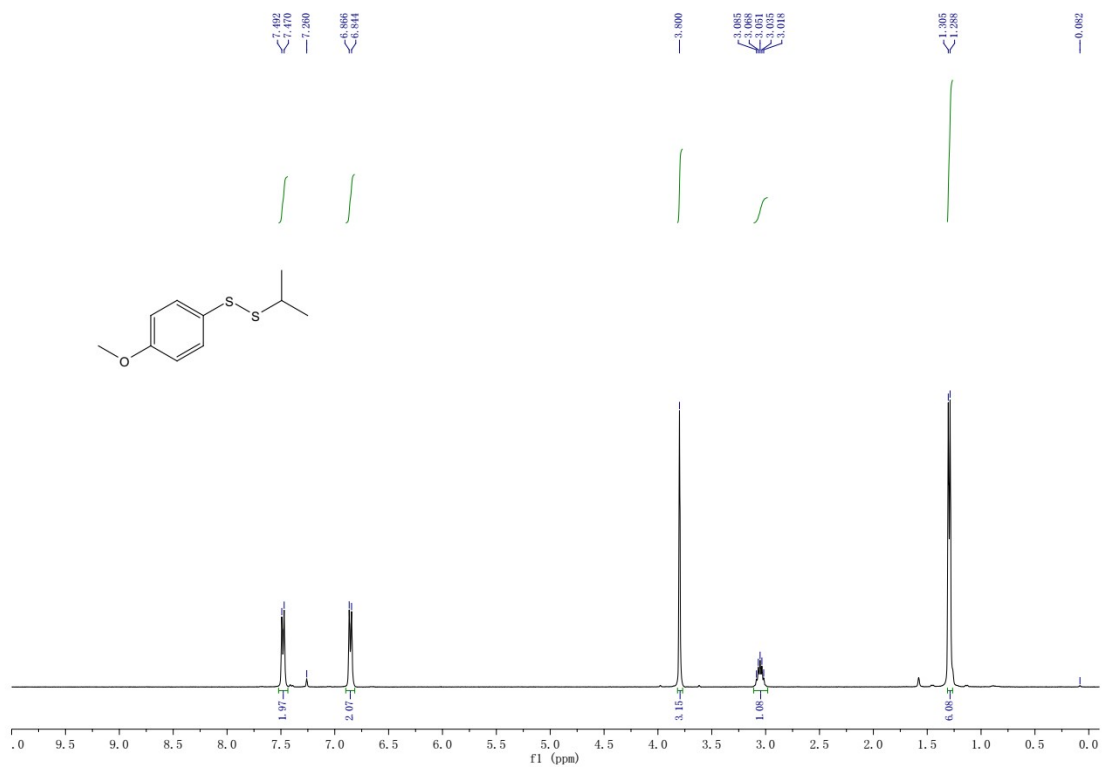

$^{13}\text{C}$  NMR spectrum for compound **3u** ( $\text{CDCl}_3$ , 101 MHz)

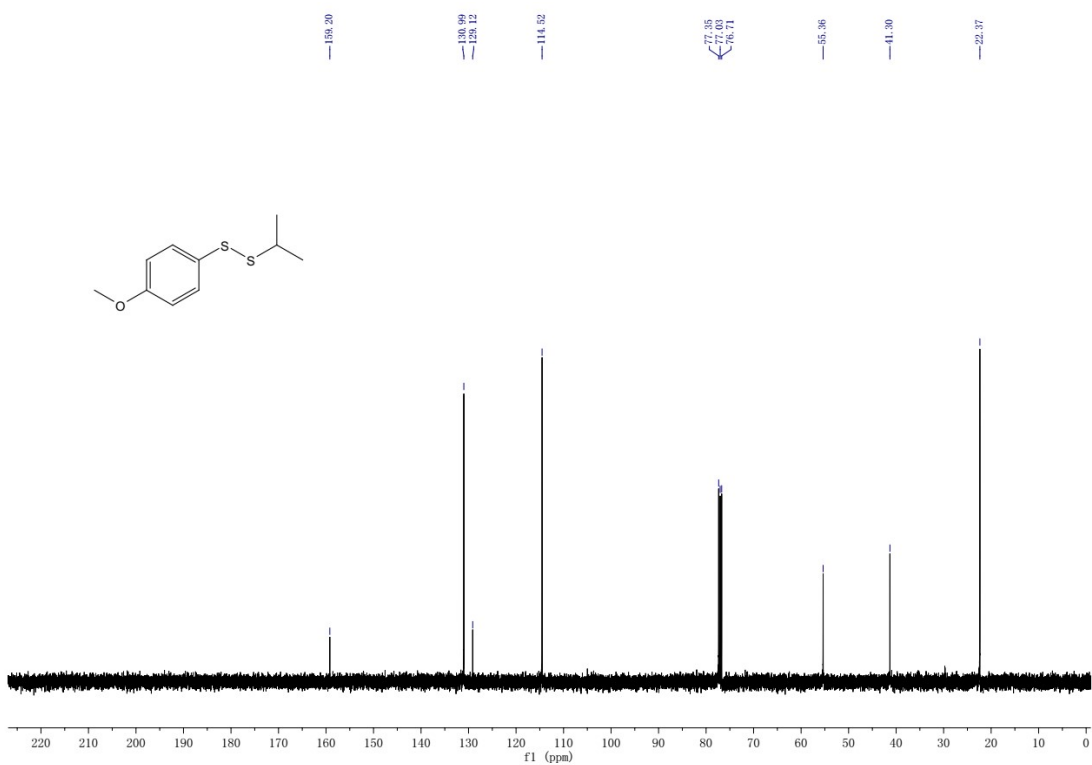

$^1\text{H}$  NMR spectrum for compound **4** ( $\text{CDCl}_3$ , 400 MHz)

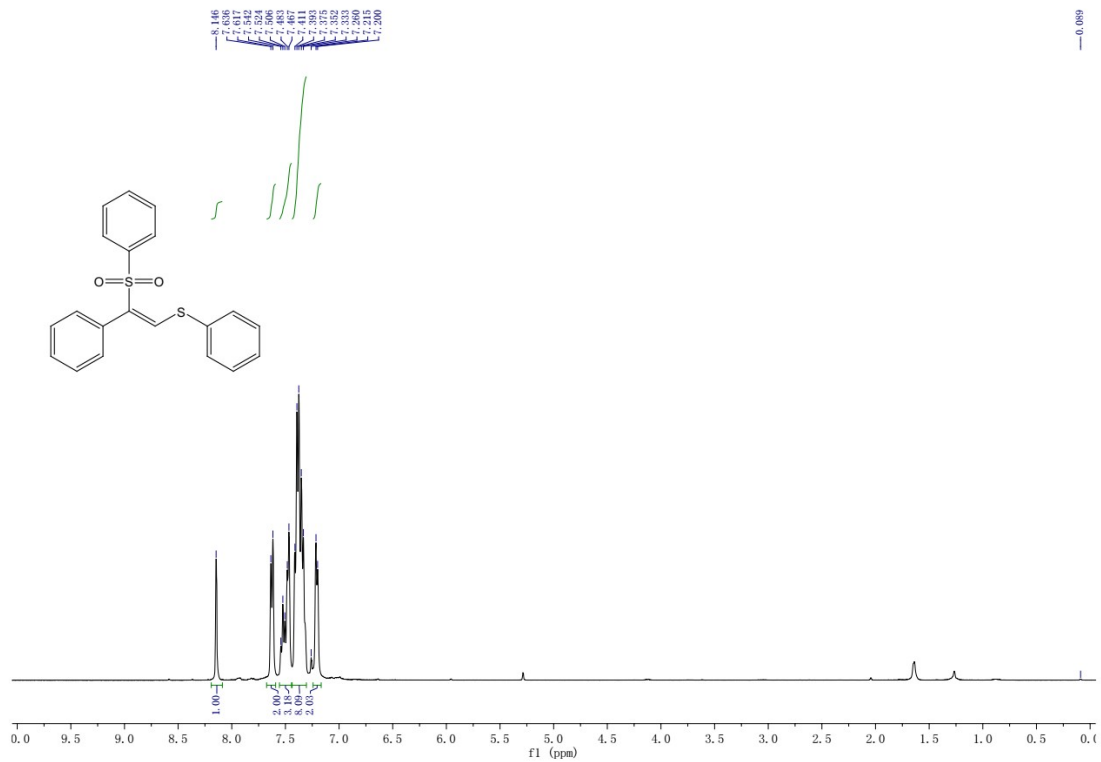

$^{13}\text{C}$  NMR spectrum for compound 4 ( $\text{CDCl}_3$ , 101 MHz)

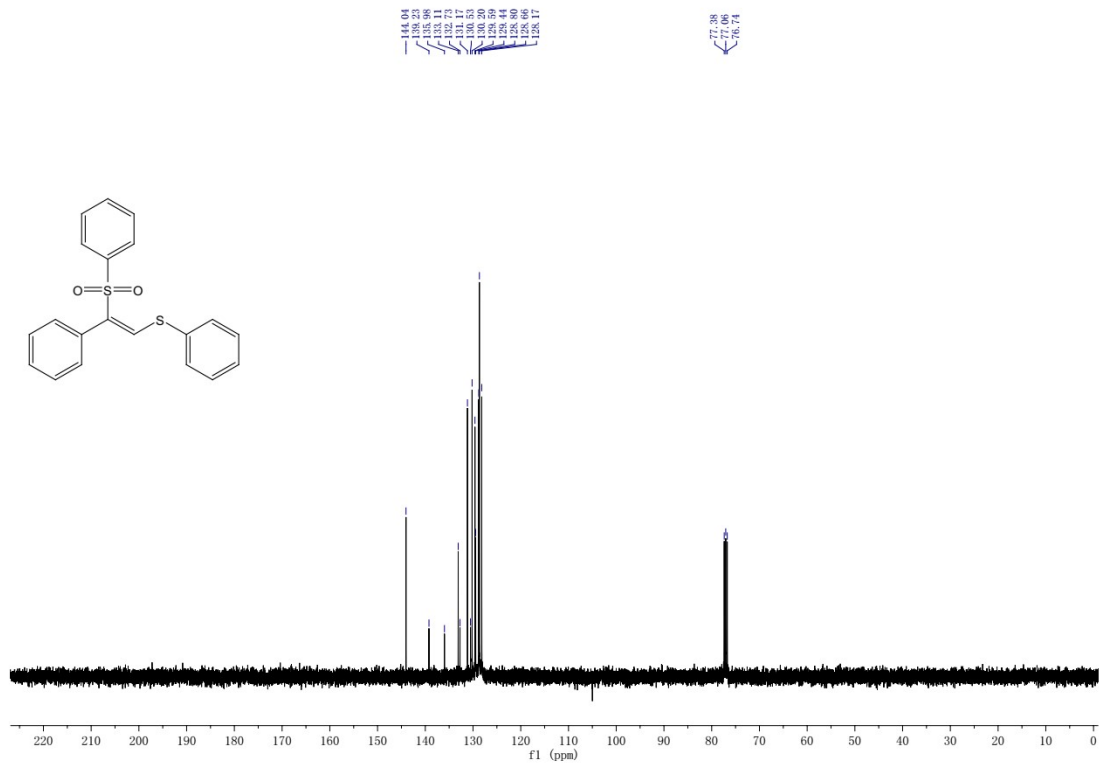

$^1\text{H}$  NMR spectrum for compound 5 ( $\text{CDCl}_3$ , 400 MHz)

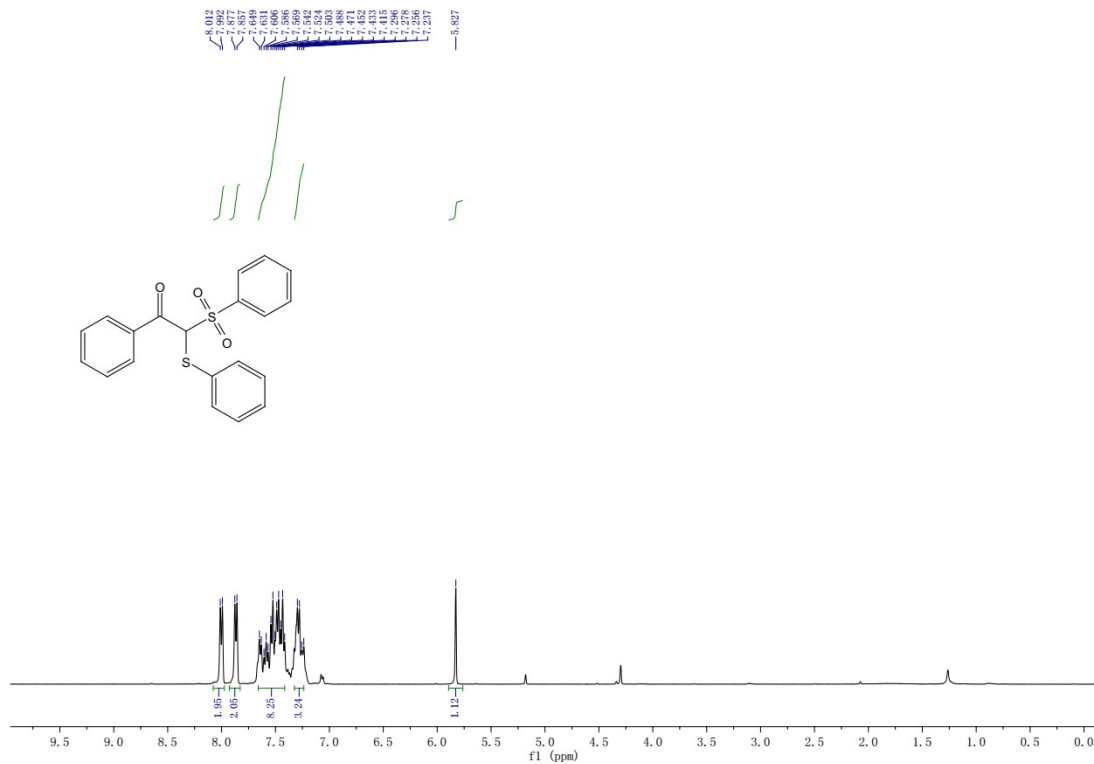

<sup>13</sup>C NMR spectrum for compound 5 (CDCl<sub>3</sub>, 101 MHz)

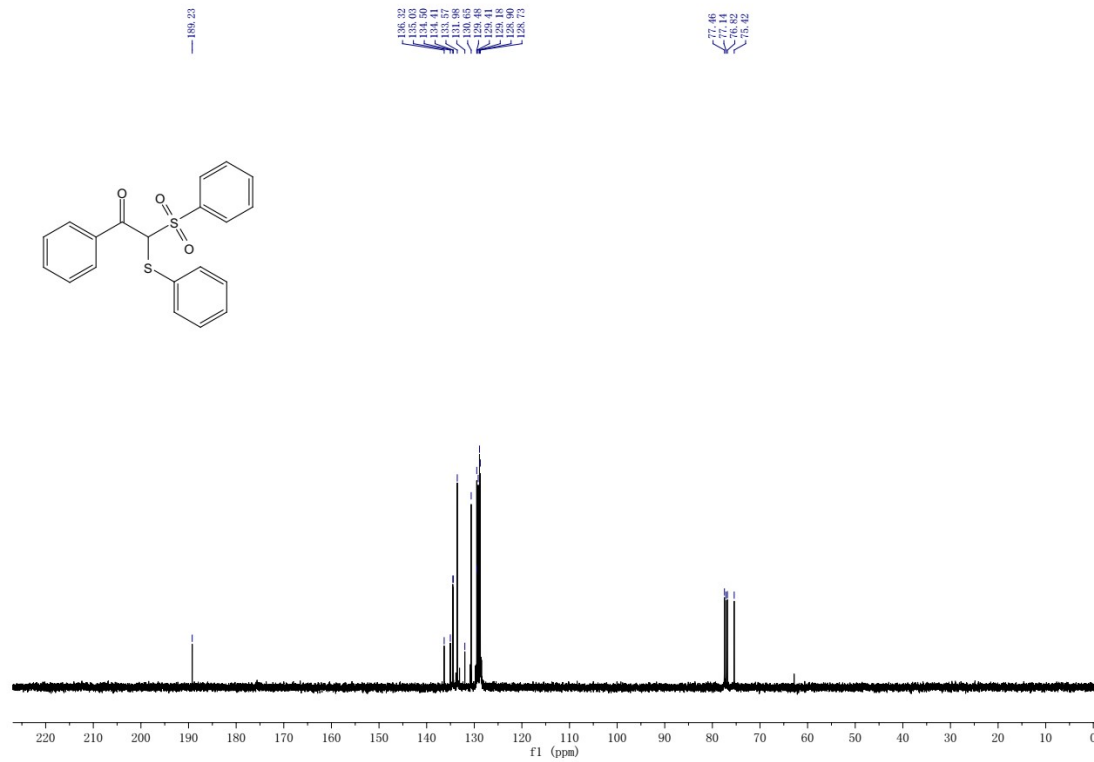

<sup>1</sup>H NMR spectrum for compound 6 (CDCl<sub>3</sub>, 400 MHz)

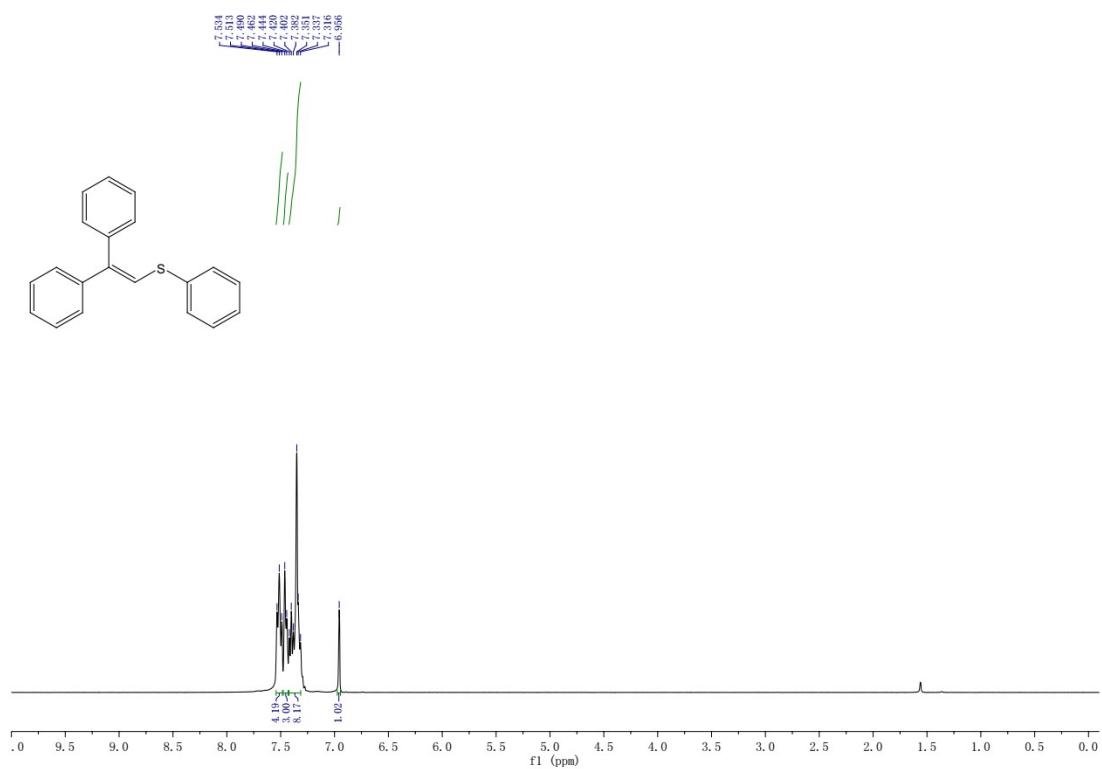

<sup>13</sup>C NMR spectrum for compound 6 (CDCl<sub>3</sub>, 101 MHz)

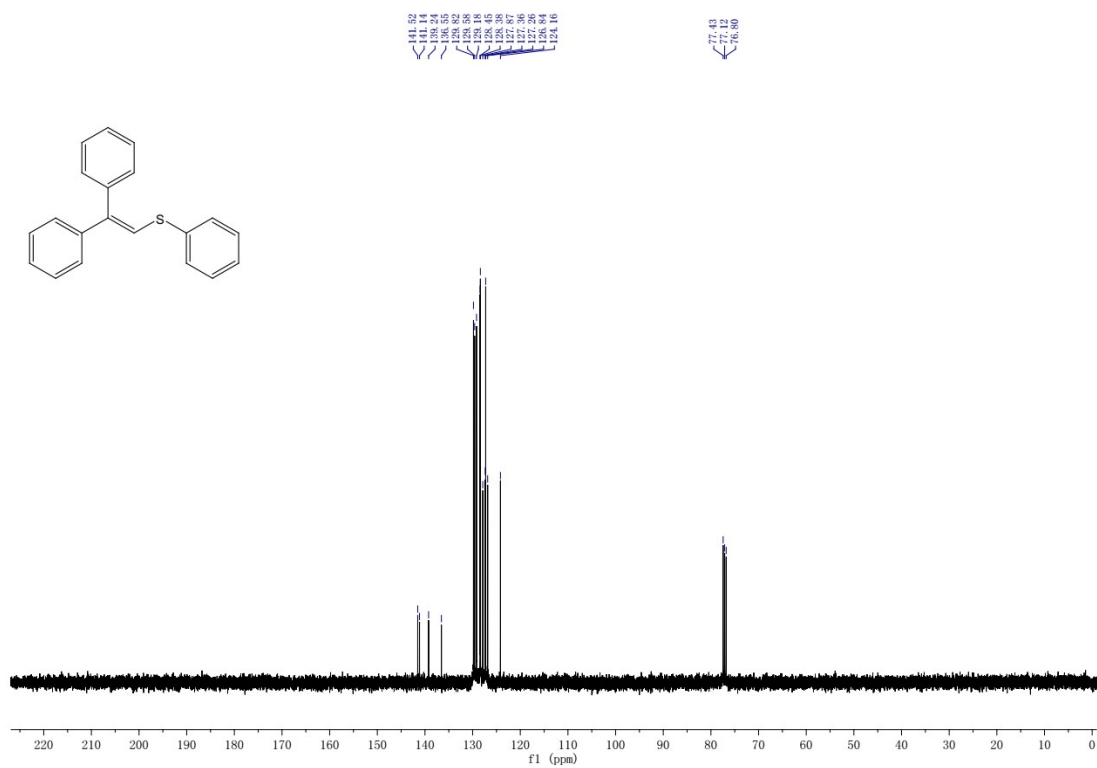

<sup>1</sup>H NMR spectrum for compound 7 (CDCl<sub>3</sub>, 400 MHz)

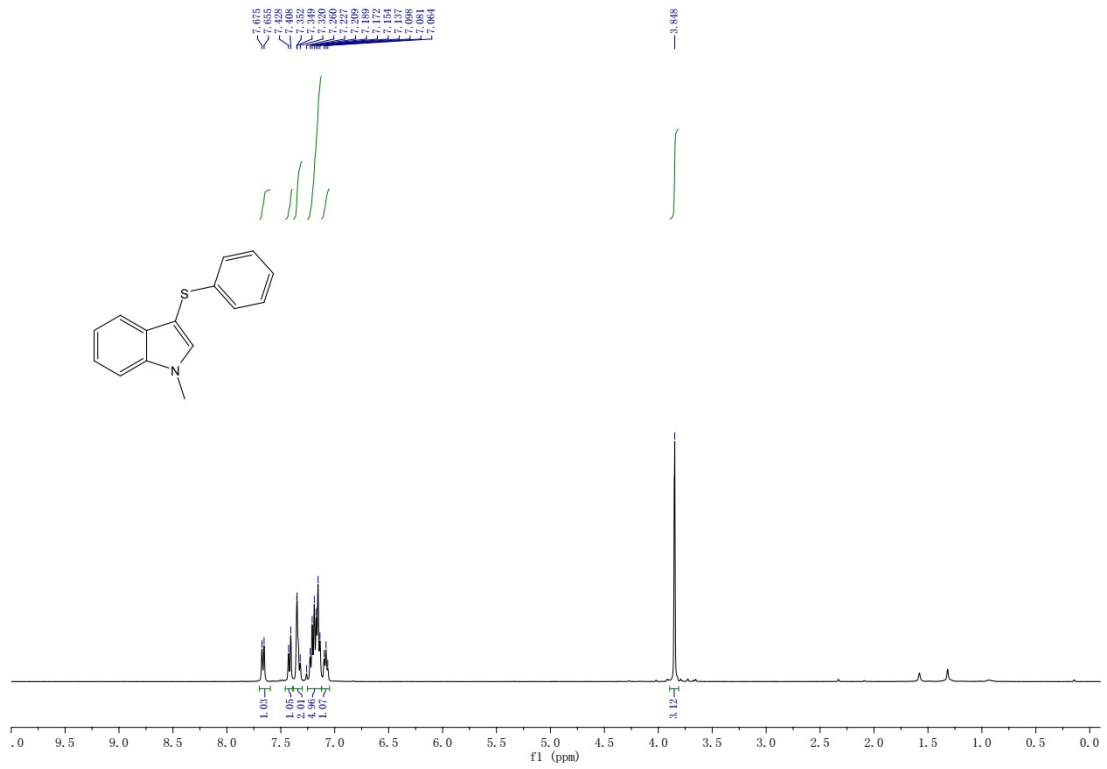

<sup>13</sup>C NMR spectrum for compound **7** (CDCl<sub>3</sub>, 101 MHz)

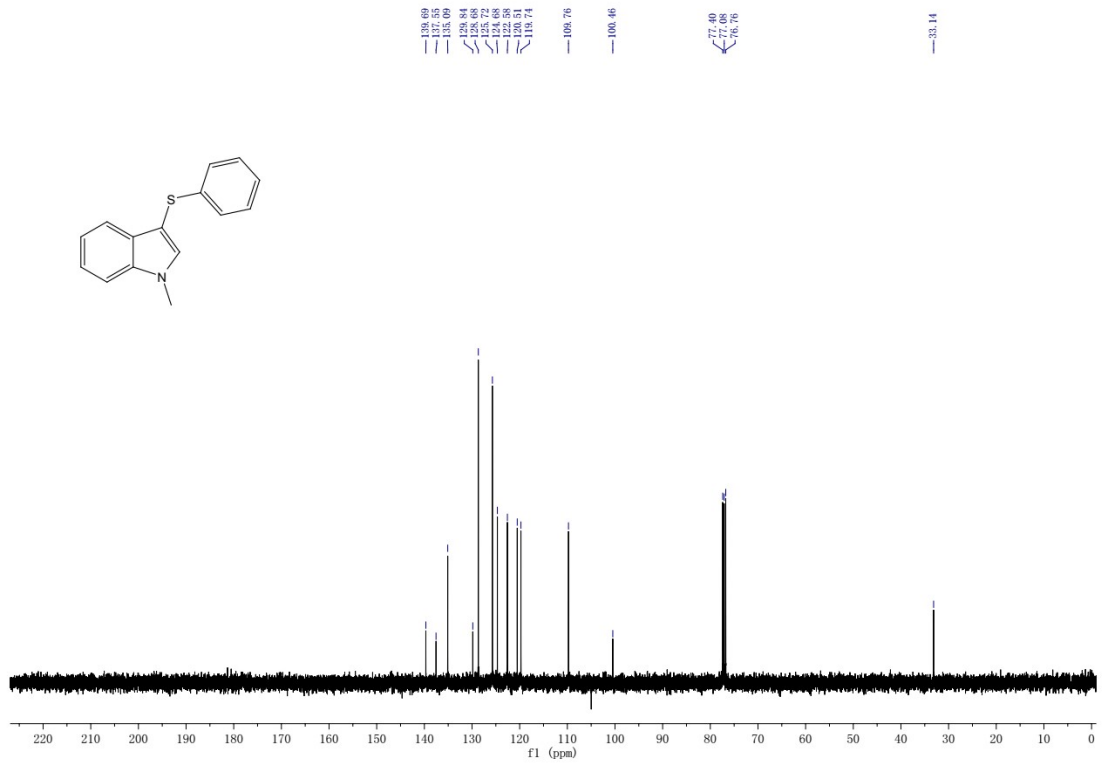

<sup>1</sup>H NMR(400 MHz, CDCl<sub>3</sub>) for compound **8**

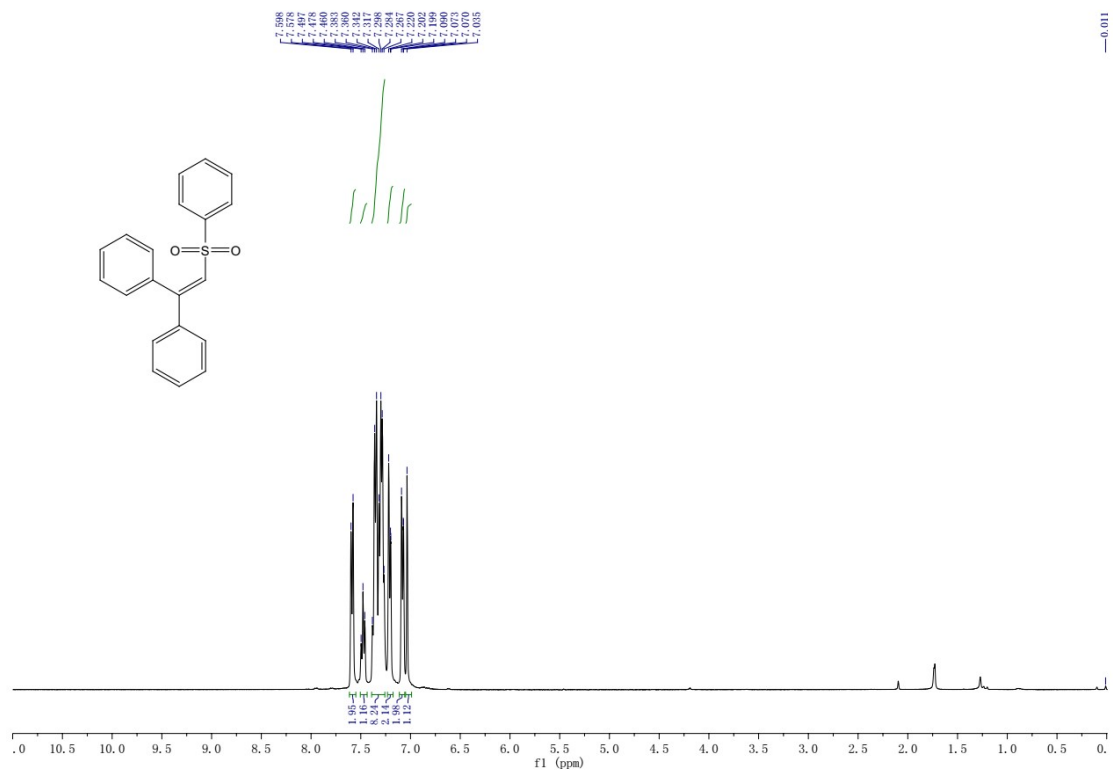

<sup>13</sup>C NMR(101 MHz, CDCl<sub>3</sub>) for compound 8

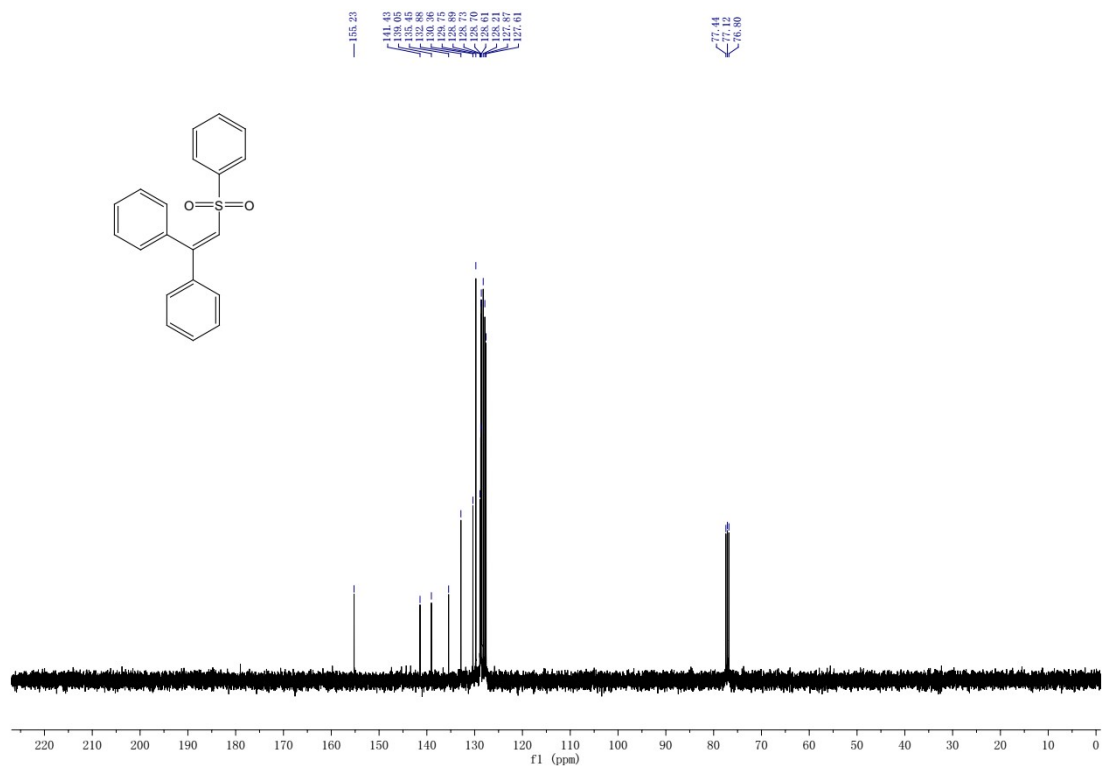

Supplement: d4gc00074a1.pdf [file d4gc00074a1.pdf]
